# Supplementary material for: A redox-neutral weak carbonyl chelation assisted C4–H allylation of indoles with vinylcyclopropanes
Source: Royal Society of Chemistry journal article supplement (doi:10.1039/d3cc03614f), 2023-01-01

Supporting Information

**A redox-neutral weak carbonyl chelation assisted C4-H allylation of indoles with  
vinylcyclopropanes**

**Table of Contents**

|    |                                                                           |        |
|----|---------------------------------------------------------------------------|--------|
| 1  | General Information                                                       | S2     |
| 2  | Representative Natural Products of C4-Allylated Indoles                   | S2     |
| 3  | Optimization Studies and Directing Groups Screening                       | S3-4   |
| 4  | General Procedure for the Preparation of Indole Substrates                | S4-5   |
| 5  | General Procedure for the Preparation of Vinylcyclopropanes               | S5-6   |
| 6  | General Procedure for the Synthesis of Vinylaziridine                     | S6     |
| 7  | General Procedure for Ru(II)-Catalyzed C4-Allylation of Indoles           | S6-7   |
| 8  | Scale-up Synthesis and Post-Synthetic Modifications                       | S7-8   |
| 9  | Characterization Data                                                     | S8-36  |
| 10 | Mechanistic Investigation                                                 | S37-38 |
| 11 | References                                                                | S38    |
| 12 | NMR ( <sup>1</sup> H, <sup>13</sup> C, <sup>19</sup> F and NOESY) Spectra | S39-99 |

**General Information.** Indoles, [Ru(*p*-cymene)Cl<sub>2</sub>]<sub>2</sub> (>97%), RuCl<sub>3</sub>·3H<sub>2</sub>O (>98%), MesCO<sub>2</sub>H (99%), 1-AdCO<sub>2</sub>H (99%), PivOH (99%), K<sub>3</sub>PO<sub>4</sub> (98%), CS<sub>2</sub>CO<sub>3</sub> (98%), K<sub>2</sub>CO<sub>3</sub> (≥98%), Na<sub>2</sub>CO<sub>3</sub> (99.5%), 3,4-dihydro-1(2*H*)-naphthalenone (97%), 3,4-epoxy-1-butene (98%), TFE and HFIP of Aldrich and TCI Chemicals were used as received. Methanol, tetrahydrofuran, 1,2-dichloroethane and chlorobenzene were dried prior as per the standard procedure. Merck silica gel G/GF254 plates were used for analytical thin-layer chromatography. Column chromatography was carried out using Rankem silica gel (60-120 mesh). Bruker Avance III 400, 500 and 600 MHz NMR spectrometers were used to record spectra using CDCl<sub>3</sub> as the solvent and tetramethylsilane (Me<sub>4</sub>Si) as an internal standard. Chemical shifts (δ) and spin-spin coupling constant (*J*) are reported in parts per million and hertz (Hz), respectively, and to describe peak patterns following abbreviations were used when appropriate: s = singlet, d = doublet, t = triplet, q = quartet, m = multiplet, dd = double doublet. Melting points were determined using a Büchi B-540 apparatus and are uncorrected. IR spectra were recorded on a PerkinElmer Fourier transform infrared spectrometer. Quadrupole time-of-flight electrospray ionization mass spectrometer (Agilent 6546) and Xevo XS mass spectrometer were used for recording HRMS.

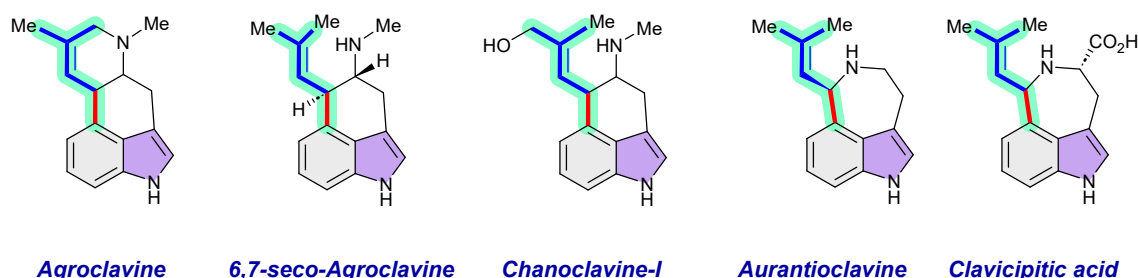

**Fig. S1 Representative Natural Products of C4-Allylated Indoles.**

**Table S1. Optimization of the Reaction Conditions<sup>a</sup>**

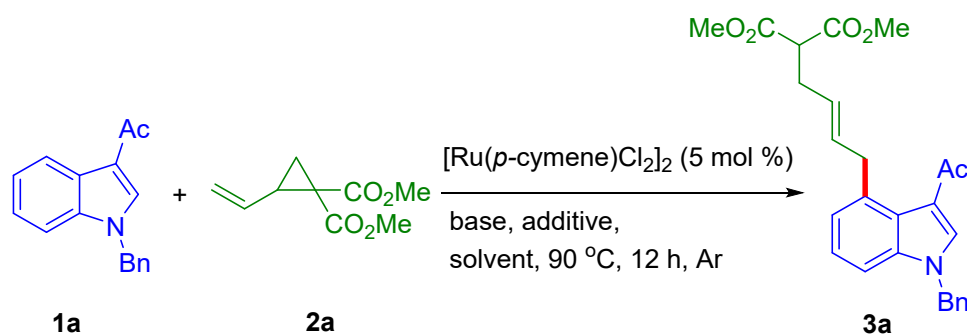

| Entry           | base                               | additive                  | solvent                           | yield (%) <sup>b</sup> | <i>E/Z</i> ratio <sup>c</sup> |
|-----------------|------------------------------------|---------------------------|-----------------------------------|------------------------|-------------------------------|
| 1               | K <sub>3</sub> PO <sub>4</sub>     | ---                       | HFIP                              | 32                     | 8:1                           |
| 2               | CS <sub>2</sub> CO <sub>3</sub>    | ---                       | HFIP                              | 41                     | 12:1                          |
| 3               | K <sub>2</sub> CO <sub>3</sub>     | ---                       | HFIP                              | 65                     | 14:1                          |
| 4               | Na <sub>2</sub> CO <sub>3</sub>    | ---                       | HFIP                              | 50                     | 10:1                          |
| <b>5</b>        | <b>K<sub>2</sub>CO<sub>3</sub></b> | <b>MesCO<sub>2</sub>H</b> | <b>HFIP</b>                       | <b>79</b>              | <b>25:1</b>                   |
| 6               | K <sub>2</sub> CO <sub>3</sub>     | 1-AdCO <sub>2</sub> H     | HFIP                              | 68                     | 18:1                          |
| 7               | K <sub>2</sub> CO <sub>3</sub>     | PivOH                     | HFIP                              | 64                     | 16:1                          |
| 8               | K <sub>2</sub> CO <sub>3</sub>     | TsOH                      | HFIP                              | 61                     | 13:1                          |
| 9               | K <sub>2</sub> CO <sub>3</sub>     | (PhO) <sub>2</sub> POOH   | HFIP                              | 52                     | 10:1                          |
| 10              | K <sub>2</sub> CO <sub>3</sub>     | MesCO <sub>2</sub> H      | TFE                               | 25                     | 7:1                           |
| 11              | K <sub>2</sub> CO <sub>3</sub>     | MesCO <sub>2</sub> H      | MeOH                              | trace                  | ---                           |
| 12              | K <sub>2</sub> CO <sub>3</sub>     | MesCO <sub>2</sub> H      | H <sub>2</sub> O                  | n.d.                   | ---                           |
| 13              | K <sub>2</sub> CO <sub>3</sub>     | MesCO <sub>2</sub> H      | (CH <sub>2</sub> Cl) <sub>2</sub> | 45                     | 5:1                           |
| 14              | K <sub>2</sub> CO <sub>3</sub>     | MesCO <sub>2</sub> H      | THF                               | trace                  | ---                           |
| 15              | K <sub>2</sub> CO <sub>3</sub>     | MesCO <sub>2</sub> H      | PhCl                              | n.d.                   | ---                           |
| 16              | ---                                | MesCO <sub>2</sub> H      | HFIP                              | n.d.                   | ---                           |
| 17 <sup>d</sup> | K <sub>2</sub> CO <sub>3</sub>     | MesCO <sub>2</sub> H      | HFIP                              | 41                     | 25:1                          |
| 18 <sup>e</sup> | K <sub>2</sub> CO <sub>3</sub>     | MesCO <sub>2</sub> H      | HFIP                              | 23                     | 25:1                          |
| 19 <sup>f</sup> | K <sub>2</sub> CO <sub>3</sub>     | MesCO <sub>2</sub> H      | HFIP                              | n.d.                   | ---                           |
| 20 <sup>g</sup> | K <sub>2</sub> CO <sub>3</sub>     | MesCO <sub>2</sub> H      | HFIP                              | n.d.                   | ---                           |
| 21 <sup>h</sup> | K <sub>2</sub> CO <sub>3</sub>     | MesCO <sub>2</sub> H      | HFIP                              | 55                     | 25:1                          |

<sup>a</sup>Reaction conditions: **1a** (0.1 mmol), **2a** (0.2 mmol) [Ru(*p*-cymene)Cl<sub>2</sub>]<sub>2</sub> (5 mol %), base (0.2 mmol), additive (30 mol %), solvent (1 mL), 90 °C, 12 h, Ar, pressure tube. <sup>b</sup> Isolated yield. <sup>c</sup>

Determined by  $^1\text{H NMR}$ . <sup>d</sup> 1.0 equiv base used. <sup>e</sup> Reaction at 25 °C. <sup>f</sup> Without [Ru]-catalyst. <sup>g</sup> 5 mol %  $\text{RuCl}_3 \cdot 3\text{H}_2\text{O}$  used. <sup>h</sup> Under air. n.d. = not detected

### Scheme S1. Directing Groups Screening<sup>a,b</sup>

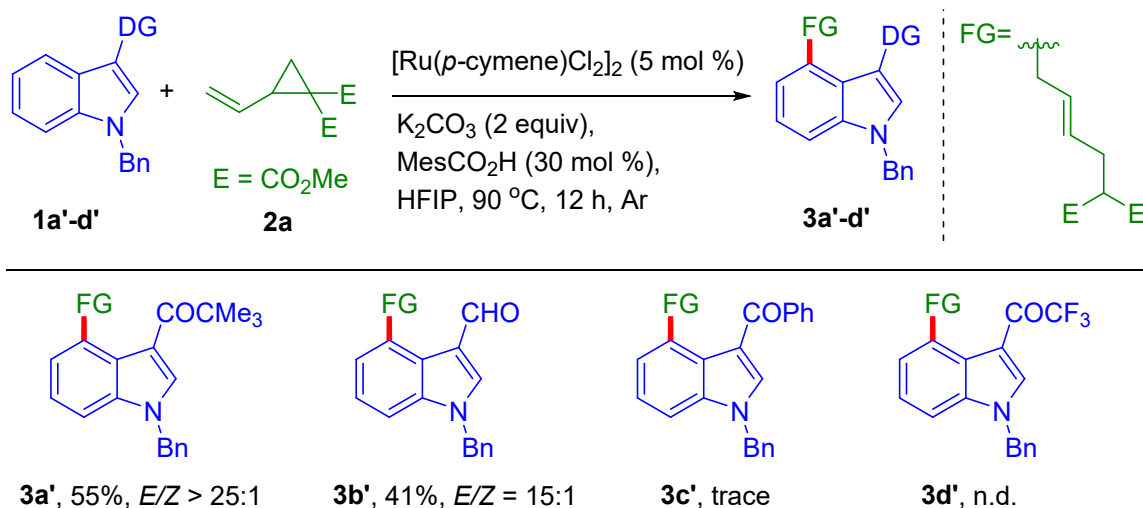

<sup>a</sup>Reaction conditions: **1a'-d'** (0.1 mmol), **2a** (0.2 mmol),  $[\text{Ru}(p\text{-cymene})\text{Cl}_2]_2$  (5 mol %),  $\text{K}_2\text{CO}_3$  (0.2 mmol),  $\text{MesCO}_2\text{H}$  (30 mol %), HFIP (1 mL), 90 °C, 12 h, Ar, pressure tube .

<sup>b</sup>Isolated yield.

**General Procedure for the Preparation of Indole Substrates 1.**<sup>1</sup> To a stirred solution of indole (2 mmol) in  $\text{CH}_2\text{Cl}_2$  (10 mL),  $\text{Et}_2\text{AlCl}$  (1.5 mL, 3 mmol, 2 mol/L in hexane) was added dropwise under argon atmosphere at 0 °C. The resulting solution was allowed to stir for 30 min at 0 °C. Then, the solution of corresponding acid chloride (3 mmol) in  $\text{CH}_2\text{Cl}_2$  (5 mL) was added dropwise at 0 °C and was further stirred at the same temperature for an appropriate time (2-4 h). The progress of the reaction was monitored by TLC. Upon completion, the reaction mixture was quenched with aqueous buffer (pH 7) and extracted with  $\text{CH}_2\text{Cl}_2$  (2 x 20 mL). The combined organic layer was washed with brine (2 x 10 mL) and water (1 x 10 mL). Drying over  $\text{Na}_2\text{SO}_4$  and evaporation of the solvent gave a residue that was purified on silica gel column chromatography using *n*-hexane and ethyl acetate as an eluent to afford 3-acyl indoles.

Next, to a stirred suspension of NaH (1.05 mmol, 60 % dispersion in mineral oil) in THF (5 mL) at 0 °C, 3-acyl indole (1 mmol) was added and stirred for 15 minutes. Then, corresponding

alkyl bromide (1.1 mmol) was added slowly to the reaction mixture and allowed to warm at room temperature and stirred for the appropriate time. Upon completion (as monitored by TLC), the reaction mixture was quenched with water and extracted with EtOAc (3 x 10 mL). The combined solution was washed with brine (2 x 10 mL) and water (1 x 10 mL). Drying over Na<sub>2</sub>SO<sub>4</sub> and evaporation of the solvent gave a residue that was purified on silica gel column chromatography using ethyl acetate and *n*-hexane as an eluent to give *N*-alkyl 3-acyl indole **1**.

Substrate **1k** is new, the complete characterization data are provided, whereas **1a-j**, **1l-u**, **1a'-d'**, **1A-C** and **1E** are known, synthesized according to the reported procedure and <sup>1</sup>H NMR are given to show the purity.

### General Procedure for the Synthesis of Vinylcyclopropanes **2**.<sup>2</sup>

**Preparation of 2a:**<sup>2d</sup> To an oven-dried round bottom flask, Na-metal (10.3 mmol, 240 mg) was added portion-wise in dry MeOH (10 mL) and stirred at room temperature until complete dissolution. The resulting solution was added dropwise to a stirring solution of (*E*)-1,4-dibromobut-2-ene (4.7 mmol, 1g) and dimethyl malonate (5.1 mmol, 0.59 mL) in dry MeOH (5 mL) at room temperature under argon atmosphere and allowed to stir for 16 h. Upon completion (monitored by TLC), the reaction mixture was quenched with water (20 mL) and extracted with EtOAc (3 x 20 mL). The combined solution was washed with brine (1 x 10 mL) and water (1 x 10 mL). Drying over Na<sub>2</sub>SO<sub>4</sub> and evaporation of the solvent gave a residue that was purified on silica gel column chromatography using ethyl acetate and *n*-hexane (10/90, v/v) as an eluent to give vinylcyclopropane **2a** in 80% (691 mg) yield.

**Preparation of 2b-i:**<sup>2b</sup> To a stirred solution of (*E*)-1,4-dibromobut-2-ene (2.5 mmol, 535 mg) and corresponding malonate (2.5 mmol) in dry THF (15 mL), Cs<sub>2</sub>CO<sub>3</sub> (6.25 mmol, 2 g) was added and allowed to stir at 60 °C for an appropriate time (24-48 h). Upon completion, monitored by TLC, the reaction mixture was cooled to room temperature, diluted with diethyl ether (20 mL) and passed through a short pad of celite. The organic part was washed with saturated aq. NaHCO<sub>3</sub> solution (5 mL) and brine (5 mL). Drying over Na<sub>2</sub>SO<sub>4</sub> and evaporation of the solvent gave a residue that was purified on silica gel column chromatography using ethyl acetate and *n*-hexane (20/80, v/v) as an eluent to give VCPs **2b-i**.

### Preparation of 2k:<sup>2a,e</sup>

To a stirred solution of dimethyl 2-vinylcyclopropane-1,1-dicarboxylate **2a** (5.88 mmol, 1.08 g) in MeOH (5 mL) at room temperature, 1.7N NaOH solution (7 mmol, 5 mL) was added and

allowed the solution to stir for 1.5 h. Upon completion, the reaction mixture was diluted with EtOAc (10 mL) and water (5 mL) to get two separate layers. Then, the aqueous part was acidified with 5% HCl solution as monitored by pH paper. The organic layer was extracted with EtOAc (3 x 10 mL) and washed with brine (10 mL). Drying over Na<sub>2</sub>SO<sub>4</sub> and evaporation of the solvent gave a residue that was concentrated under vacuum to get the mono-saponified VCP and used for the next step without purification.

Next, to a stirred solution of 1-(methoxycarbonyl)-2-vinylcyclopropane-1-carboxylic acid (1.1 mmol, 190 mg) in dry CH<sub>2</sub>Cl<sub>2</sub> (5 mL), *vitamin E* (1 mmol, 430 mg), DMAP (0.2 mmol, 25 mg) and DCC (1.3 mmol, 268 mg) were added in a sequence at 0 °C. Then, the reaction mixture was allowed to cool to room temperature and stirred for 12 h at the same temperature. Upon completion, monitored by TLC, the reaction mixture was diluted with CH<sub>2</sub>Cl<sub>2</sub> (10 mL) and passed through a short pad of celite. Evaporation of the solvent gave a residue which was purified on silica gel column chromatography using ethyl acetate and *n*-hexane (10/90, v/v) as an eluent to give VCP **2k**.

Substrate **2k** is new whose characterization data are provided whereas **2a-j** are known and prepared according to the reported procedure whose <sup>1</sup>H NMR are given to show the purity.

**General Procedure for the Synthesis of Vinylaziridine 2A.**<sup>3</sup> To a stirred solution of buta-1,3-diene (5 mmol, 0.44 mL) and Chloramine-T trihydrate (5.5 mmol, 1.55 g) in dry CH<sub>3</sub>CN (25 mL), pyridinium hydrobromide perbromide (0.5 mmol, 160 mg) was added and allowed to stir at room temperature for 12 h under argon atmosphere. Upon completion, monitored by TLC, the reaction mixture was quenched with water (20 mL) and extracted with EtOAc (3 x 20 mL). The combined organic solution was washed with brine (1 x 10 mL) and water (1 x 10 mL). Drying over Na<sub>2</sub>SO<sub>4</sub> and evaporation of the solvent gave a residue that was purified on silica gel column chromatography using *n*-hexane and ethyl acetate (90/10, v/v) as an eluent to give vinylaziridine **2A** in 52% (557 mg) yield.

**General Procedure for Ru(II)-Catalyzed C4-Allylation of Indoles.** In an oven-dried pressure tube, a mixture of indole **1** (0.1 mmol), vinylcyclopropane **2** (0.2 mmol), [Ru(*p*-cymene)Cl<sub>2</sub>]<sub>2</sub> (5 mol %, 0.005 mmol, 3 mg), K<sub>2</sub>CO<sub>3</sub> (0.2 mmol, 28 mg) and MesCO<sub>2</sub>H (0.03 mmol, 5 mg) were stirred in HFIP (1 mL) at 90 °C in a preheated oil bath for 12 h under Ar atmosphere. The reaction progress was monitored by TLC using ethyl acetate and hexane as an eluent. Upon completion, the reaction mixture was allowed to cool to room temperature and was diluted with EtOAc and passed through a celite pad. The filtrate was concentrated under

reduced pressure and the residue was purified on silica gel column chromatography using *n*-hexane and ethyl acetate as an eluent to afford C4-allylated indole **3** in moderate to good yields.

**Scale-up Synthesis of 3a.** In an oven-dried pressure tube, a mixture of 1-(1-benzyl-1*H*-indol-3-yl)ethan-1-one **1a** (2 mmol, 498 mg), dimethyl 2-vinylcyclopropane-1,1-dicarboxylate **2a** (4 mmol, 736 mg), [Ru(*p*-cymene)Cl<sub>2</sub>]<sub>2</sub> (5 mol%, 0.1 mmol, 61 mg), K<sub>2</sub>CO<sub>3</sub> (4 mmol, 552 mg), MesCO<sub>2</sub>H (0.6 mmol, 98 mg) and HFIP (15 mL) were subjected to the aforementioned general procedure. Upon completion, monitored by TLC, the reaction mixture was cooled to room temperature and was diluted with EtOAc and passed through a short pad of celite. Evaporation of the solvent gave a residue that was purified on silica gel column chromatography using *n*-hexane and ethyl acetate as an eluent (85/15, v/v) to afford **3a** in 65% (0.56 g) yield.

### Procedures for the Post-Synthetic Modifications

**Removal of Acetyl Directing Group.**<sup>1a</sup> In an oven-dried round bottom flask, a mixture of dimethyl (*E*)-2-(4-(3-acetyl-1-benzyl-1*H*-indol-4-yl)but-2-en-1-yl)malonate **3a** (0.1 mmol, 43 mg), ethylene glycol (0.1 mL) and *p*-toluenesulfonic acid monohydrate (0.1 mmol, 21 mg) was refluxed in benzene (2 mL) for 3 h. After completion, monitored by TLC, the reaction mixture was cooled to room temperature, washed with saturated NaHCO<sub>3</sub> solution (5 mL) and extracted using EtOAc (3 x 10 mL). Drying over Na<sub>2</sub>SO<sub>4</sub> and evaporation of the solvent under reduced pressure gave a residue that was purified on silica gel column chromatography using *n*-hexane and ethyl acetate (97/3, v/v) as an eluent to afford **5** in 73 % (28.5 mg) yield.

**Synthesis of 6.**<sup>4</sup> In an oven-dried round bottom flask, a mixture of dimethyl (*E*)-2-(4-(3-acetyl-1-benzyl-1*H*-indol-4-yl)but-2-en-1-yl)malonate **3a** (0.1 mmol, 43 mg) and LiCl (0.5 mmol, 21 mg) in DMSO (1 mL) and H<sub>2</sub>O (0.5 mmol, 10 μL) was stirred at 150 °C for 12 h under argon atmosphere. Upon completion, the reaction mixture was cooled to room temperature and extracted with EtOAc (3 x 10 mL). The organic layer was washed with brine (1 x 10 mL) and water (1 x 10 mL). Drying over Na<sub>2</sub>SO<sub>4</sub> and evaporation of the solvent gave a residue that was purified on silica gel column chromatography using *n*-hexane and ethyl acetate (90/10, v/v) as an eluent to afford **6** in 70 % (26.2 mg) yield.

**Synthesis of 7.**<sup>5</sup> To a stirred solution of dimethyl (*E*)-2-(4-(3-acetyl-1-benzyl-1*H*-indol-4-yl)but-2-en-1-yl)malonate **3a** (0.1 mmol, 43 mg) and a suspension of NaH (0.11 mmol, 4.5 mg, 60 % dispersion in mineral oil) in THF (2 mL) at 0 °C for 20 min, allyl bromide (0.1 mmol, 9 μL) was added and the stirring was continued for 3 h at room temperature. Upon completion, monitored by TLC, the reaction mixture was quenched with saturated aq. NH<sub>4</sub>Cl solution (1

mL) and diluted with EtOAc (5 mL) and water (5 mL), The organic layer was extracted using EtOAc (2 x 10 mL), dried over Na<sub>2</sub>SO<sub>4</sub> and evaporation of the solvent under reduced pressure gave a residue that was purified on silica gel column chromatography using *n*-hexane and ethyl acetate (90/10, v/v) as an eluent to afford **7** in 66 % (31.2 mg) yield.

### Characterization Data of the Indole Substrates

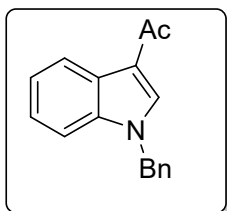

**1-(1-Benzyl-1*H*-indol-3-yl)ethan-1-one 1a.** Colorless solid; <sup>1</sup>H NMR (600 MHz, CDCl<sub>3</sub>) δ 8.41-8.39 (m, 1H), 7.75 (s, 1H), 7.35-7.27 (m, 5H), 7.16-7.15 (m, 2H), 5.35 (s, 2H), 2.52 (s, 3H).

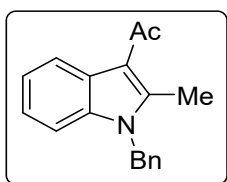

**1-(1-Benzyl-2-methyl-1*H*-indol-3-yl)ethan-1-one 1b.** Colorless solid; <sup>1</sup>H NMR (600 MHz, CDCl<sub>3</sub>) δ 8.02 (d, *J* = 8.4 Hz, 1H), 7.29-7.25 (m, 5H), 7.22-7.19 (m, 1H), 6.99 (d, *J* = 7.2 Hz, 2H), 5.38 (s, 2H), 2.74 (s, 3H), 2.71 (s, 3H).

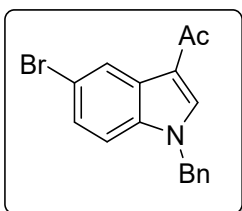

**1-(1-Benzyl-5-bromo-1*H*-indol-3-yl)ethan-1-one 1c.** Light yellow solid; <sup>1</sup>H NMR (400 MHz, CDCl<sub>3</sub>) δ 8.57-8.56 (m, 1H), 7.72 (s, 1H), 7.37-7.32 (m, 4H), 7.15-7.12 (m, 3H), 5.32 (s, 2H), 2.49 (s, 3H).

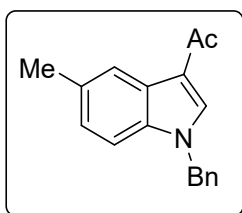

**1-(1-Benzyl-5-methyl-1*H*-indol-3-yl)ethan-1-one 1d.** Colorless solid; <sup>1</sup>H NMR (400 MHz, CDCl<sub>3</sub>) δ 8.20 (s, 1H), 7.71 (s, 1H), 7.35-7.30 (m, 3H), 7.18-7.13 (m, 3H), 7.09-7.06 (m, 1H), 5.32 (s, 2H), 2.50 (s, 3H), 2.47 (s, 3H).



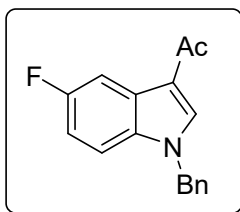

**1-(1-Benzyl-5-fluoro-1H-indol-3-yl)ethan-1-one 1e.** Light brown solid;  
 $^1\text{H}$  NMR (400 MHz,  $\text{CDCl}_3$ )  $\delta$  8.09 (dd,  $J = 9.6, 2.4$  Hz, 1H), 7.76 (s, 1H), 7.37-7.31 (m, 3H), 7.19-7.13 (m, 3H), 6.99-6.94 (m, 1H), 5.32 (s, 2H), 2.48 (s, 3H).

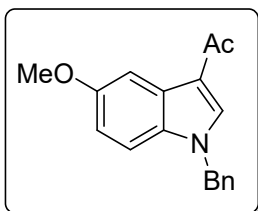

**1-(1-Benzyl-5-methoxy-1H-indol-3-yl)ethan-1-one 1f.** Brown solid;  
 $^1\text{H}$  NMR (600 MHz,  $\text{CDCl}_3$ )  $\delta$  7.92-7.91 (m, 1H), 7.70 (s, 1H), 7.33-7.29 (m, 3H), 7.15-7.12 (m, 3H), 6.88-6.87 (m, 1H), 5.28 (s, 2H), 3.87 (s, 3H), 2.48 (s, 3H).

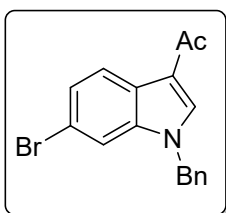

**1-(1-Benzyl-6-bromo-1H-indol-3-yl)ethan-1-one 1g.** Light yellow solid;  
 $^1\text{H}$  NMR (400 MHz,  $\text{CDCl}_3$ )  $\delta$  8.28 (d,  $J = 8.4$  Hz, 1H), 7.69 (s, 1H), 7.46-7.45 (m, 1H), 7.40-7.33 (m, 4H), 7.15-7.13 (m, 2H), 5.30 (s, 2H), 2.49 (s, 3H).

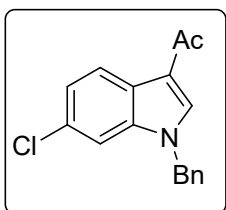

**1-(1-Benzyl-6-chloro-1H-indol-3-yl)ethan-1-one 1h.** Light brown solid;  
 $^1\text{H}$  NMR (400 MHz,  $\text{CDCl}_3$ )  $\delta$  8.32 (d,  $J = 8.8$  Hz, 1H), 7.69 (s, 1H), 7.37-7.32 (m, 3H), 7.27-7.22 (m, 2H), 7.14-7.12 (m, 2H), 5.27 (s, 2H), 2.47 (s, 3H).

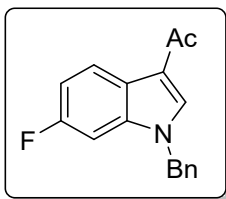

**1-(1-Benzyl-6-fluoro-1H-indol-3-yl)ethan-1-one 1i.** Colorless solid;  $^1\text{H}$  NMR (600 MHz,  $\text{CDCl}_3$ )  $\delta$  8.26-8.23 (m, 1H), 7.62 (s, 1H), 7.26-7.21 (m, 3H), 7.05-7.04 (m, 2H), 6.94-6.91 (m, 1H), 6.85-6.83 (m, 1H), 5.17 (s, 2H), 2.38 (s, 3H).

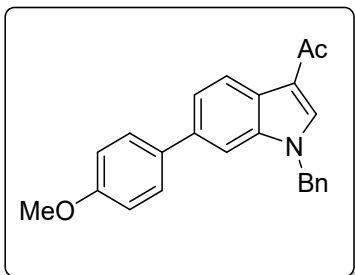

**1-(1-Benzyl-6-(4-methoxyphenyl)-1H-indol-3-yl)ethan-1-one 1j.** Colorless solid;  $^1\text{H}$  NMR (500 MHz,  $\text{CDCl}_3$ )  $\delta$  8.32 (d,  $J = 8.5$  Hz, 1H), 7.62 (s, 1H), 7.41-7.39 (m, 3H), 7.31 (s, 1H), 7.25-7.18 (m, 3H), 7.07-7.06 (m, 2H), 6.87 (d,  $J = 9.0$  Hz, 2H), 5.24 (s, 2H), 3.73 (s, 3H), 2.40 (s, 3H).

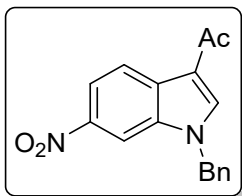

**1-(1-Benzyl-6-nitro-1H-indol-3-yl)ethan-1-one 1k.** Analytical TLC on silica gel, 1:5 ethyl acetate/hexane  $R_f = 0.43$ ; yellow solid; mp 145-146 °C; yield 84% (246.9 mg);  $^1\text{H}$  NMR (600 MHz,  $\text{CDCl}_3$ )  $\delta$  8.51 (d,  $J = 8.4$  Hz, 1H), 8.29-8.28 (m, 1H), 8.18-8.17 (m, 1H), 7.95 (s, 1H), 7.40-7.36 (m, 3H), 7.20-7.18 (m, 2H), 5.44 (s, 2H), 2.53 (s, 3H).  $^{13}\text{C}$  NMR (150 MHz,  $\text{CDCl}_3$ )  $\delta$  192.6, 144.5, 138.8, 136.0, 134.7, 131.2, 129.5, 128.9, 127.2, 123.2, 118.0, 117.9, 107.0, 51.3, 27.8; FT-IR (KBr) 2925, 1653, 1515, 1388, 1336, 1177, 749  $\text{cm}^{-1}$ ; HRMS (ESI)  $m/z$   $[\text{M}+\text{H}]^+$  calcd for  $\text{C}_{17}\text{H}_{15}\text{N}_2\text{O}_3$ : 295.1077, found 295.1073.

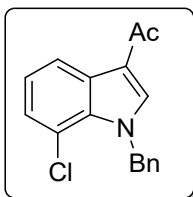

**1-(1-Benzyl-7-chloro-1H-indol-3-yl)ethan-1-one 1l.** Colorless solid;  $^1\text{H}$  NMR (600 MHz,  $\text{CDCl}_3$ )  $\delta$  8.31-8.29 (m, 1H), 7.59 (s, 1H), 7.24-7.18 (m, 3H), 7.13-7.08 (m, 2H), 6.97-6.95 (m, 2H), 5.69 (s, 2H), 2.39 (s, 3H).

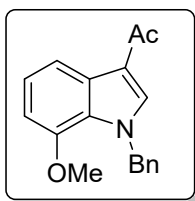

**1-(1-Benzyl-7-methoxy-1H-indol-3-yl)ethan-1-one 1m.** Yellow solid;  $^1\text{H}$  NMR (600 MHz,  $\text{CDCl}_3$ )  $\delta$  8.00 (d,  $J = 8.4$  Hz, 1H), 7.64 (s, 1H), 7.32-7.30 (m, 2H), 7.28-7.27 (m, 1H), 7.18 (t,  $J = 7.8$  Hz, 1H), 7.13-7.12 (m, 2H), 6.72 (d,  $J = 7.8$  Hz, 1H), 5.65 (s, 2H), 3.82 (s, 3H), 2.49 (s, 3H).

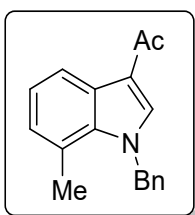

**1-(1-Benzyl-7-methyl-1H-indol-3-yl)ethan-1-one 1n.** Colorless solid;  $^1\text{H}$  NMR (400 MHz,  $\text{CDCl}_3$ )  $\delta$  8.27 (d,  $J = 8.0$  Hz, 1H), 7.61 (s, 1H), 7.25-7.18 (m, 3H), 7.10 (t,  $J = 7.6$  Hz, 1H), 6.91-6.87 (m, 3H), 5.53 (s, 2H), 2.44-2.43 (m, 6H).

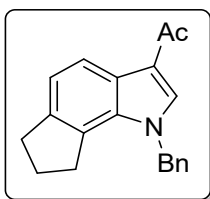

**1-(1-Benzyl-1,6,7,8-tetrahydrocyclopenta[g]indol-3-yl)ethan-1-one 1o.** Colorless solid;  $^1\text{H}$  NMR (600 MHz,  $\text{CDCl}_3$ )  $\delta$  8.17 (d,  $J = 7.8$  Hz, 1H), 7.54 (s, 1H), 7.23-7.18 (m, 3H), 7.11 (d,  $J = 8.4$  Hz, 1H), 6.93-6.91 (m, 2H), 5.39 (s, 2H), 2.97 (t,  $J = 7.2$  Hz, 2H), 2.88 (t,  $J = 7.8$  Hz, 2H), 2.39 (s, 3H), 2.00-1.96 (m, 2H).

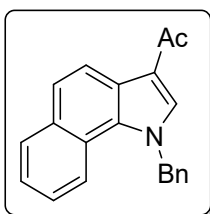

**1-(1-Benzyl-1H-benzo[g]indol-3-yl)ethan-1-one 1p.** Colorless solid;  $^1\text{H}$  NMR (600 MHz,  $\text{CDCl}_3$ )  $\delta$  8.50 (d,  $J = 8.4$  Hz, 1H), 7.93 (d,  $J = 8.4$  Hz, 1H), 7.85 (d,  $J = 7.8$  Hz, 1H), 7.62-7.58 (m, 2H), 7.32-7.29 (m, 1H), 7.27-7.17 (m, 4H), 6.98-6.97 (m, 2H), 5.66 (s, 2H), 2.43 (s, 3H).

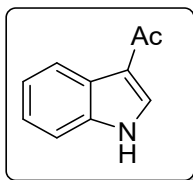

**1-(1*H*-indol-3-yl)ethan-1-one 1q.** Grey solid;  $^1\text{H}$  NMR (400 MHz,  $\text{CDCl}_3$ )  $\delta$  8.79 (s, 1H), 8.40-8.38 (m, 1H), 7.86-7.85 (m, 1H), 7.42-7.40 (m, 1H), 7.31-7.28 (m, 2H), 2.55 (s, 3H).

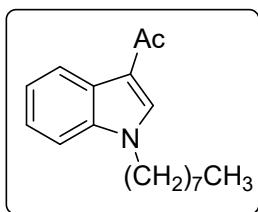

**1-(1-Octyl-1*H*-indol-3-yl)ethan-1-one 1r.** Light brown liquid;  $^1\text{H}$  NMR (600 MHz,  $\text{CDCl}_3$ )  $\delta$  8.38-8.36 (m, 1H), 7.74 (s, 1H), 7.37-7.34 (m, 1H), 7.31-7.28 (m, 2H), 4.14 (t,  $J = 7.2$  Hz, 2H), 2.53 (s, 3H), 1.90-1.86 (m, 2H), 1.60-1.58 (m, 2H), 1.35-1.31 (m, 2H), 1.30-1.23 (m, 6H), 0.87 (t,  $J = 7.2$  Hz, 3H).

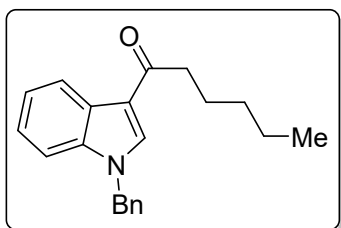

**1-(1-Benzyl-1*H*-indol-3-yl)hexan-1-one 1s.** Colorless liquid;  $^1\text{H}$  NMR (400 MHz,  $\text{CDCl}_3$ )  $\delta$  8.44 (d,  $J = 8.0$  Hz, 1H), 7.71 (s, 1H), 7.29-7.19 (m, 6H), 7.10-7.08 (m, 2H), 5.23 (s, 2H), 2.78 (t,  $J = 7.6$  Hz, 2H), 1.78-1.71 (m, 2H), 1.36-1.32 (m, 4H), 0.90-0.86 (m, 3H).

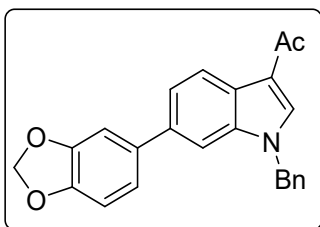

**1-(6-(Benzo[*d*][1,3]dioxol-5-yl)-1-benzyl-1*H*-indol-3-yl)ethan-1-one 1t.** Light brown solid;  $^1\text{H}$  NMR (600 MHz,  $\text{CDCl}_3$ )  $\delta$  8.40 (d,  $J = 7.8$  Hz, 1H), 7.76 (s, 1H), 7.48-7.46 (m, 1H), 7.39 (s, 1H), 7.36-7.32 (m, 3H), 7.19-7.18 (m, 2H), 7.05-7.04 (m, 2H), 6.87 (d,  $J = 7.8$  Hz, 1H), 5.99 (s, 2H), 5.38 (s, 2H), 2.53 (s, 3H).

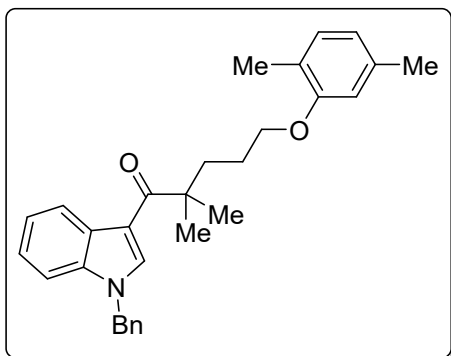

**1-(1-Benzyl-1*H*-indol-3-yl)-5-(2,5-dimethylphenoxy)-**

**2,2-dimethylpentan-1-one 1u.** Brown sticky liquid;  $^1\text{H NMR}$  (600 MHz,  $\text{CDCl}_3$ )  $\delta$  8.46 (d,  $J = 7.8$  Hz, 1H), 7.79 (s, 1H), 7.22-7.15 (m, 6H), 7.03-7.02 (m, 2H), 6.89 (d,  $J = 7.8$  Hz, 1H), 6.55 (d,  $J = 7.8$  Hz, 1H), 6.42 (s, 1H), 5.24 (s, 2H), 3.76 (t,  $J = 6.0$  Hz, 2H), 2.16 (s, 3H), 2.02 (s, 3H), 1.93-1.91 (m, 2H), 1.70-1.67 (m, 2H), 1.33 (s, 6H).

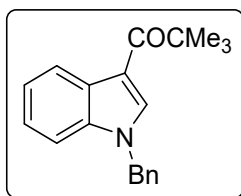

**1-(1-benzyl-1*H*-indol-3-yl)-2,2-dimethylpropan-1-one 1a'.** Colorless

solid;  $^1\text{H NMR}$  (600 MHz,  $\text{CDCl}_3$ )  $\delta$  8.53 (d,  $J = 8.4$  Hz, 1H), 7.84 (s, 1H), 7.34-7.22 (m, 6H), 7.13-7.12 (m, 2H), 5.36 (s, 2H), 1.40 (s, 9H).

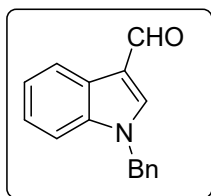

**1-Benzyl-1*H*-indole-3-carbaldehyde 1b'.** Yellow solid;  $^1\text{H NMR}$  (600

MHz,  $\text{CDCl}_3$ )  $\delta$  9.98 (s, 1H), 8.35 (d,  $J = 7.8$  Hz, 1H), 7.69 (s, 1H), 7.36-7.29 (m, 6H), 7.18-7.17 (m, 2H), 5.33 (s, 2H).

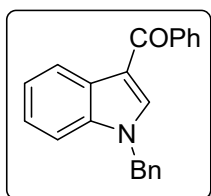

**(1-Benzyl-1*H*-indol-3-yl)(phenyl)methanone 1c'.** Brown solid;  $^1\text{H NMR}$

(600 MHz,  $\text{CDCl}_3$ )  $\delta$  8.37 (d,  $J = 7.8$  Hz, 1H), 7.74-7.73 (m, 2H), 7.54 (s, 1H), 7.46-7.44 (m, 1H), 7.40-7.37 (t,  $J = 7.5$  Hz, 2H), 7.25-7.19 (m, 6H), 7.05-7.04 (m, 2H), 5.27 (s, 2H).

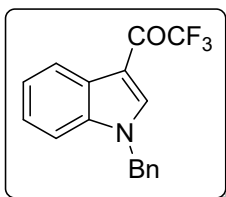

**1-(1-Benzyl-1*H*-indol-3-yl)-2,2,2-trifluoroethan-1-one 1d'**. Colorless solid;  $^1\text{H}$  NMR (600 MHz,  $\text{CDCl}_3$ )  $\delta$  8.43 (d,  $J = 7.8$  Hz, 1H), 7.98 (s, 1H), 7.39-7.33 (m, 6H), 7.18-7.17 (m, 2H), 5.41 (s, 2H).

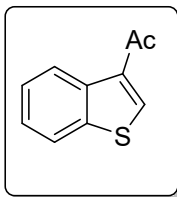

**1-(Benzo[*b*]thiophen-3-yl)ethan-1-one 1A**. Brown liquid;  $^1\text{H}$  NMR (600 MHz,  $\text{CDCl}_3$ )  $\delta$  8.77 (d,  $J = 8.4$  Hz, 1H), 8.26 (s, 1H), 7.86 (d,  $J = 8.4$  Hz, 1H), 7.50-7.47 (m, 1H), 7.43-7.40 (m, 1H), 2.64 (s, 3H).

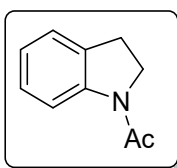

**1-(Indolin-1-yl)ethan-1-one 1B**. Light yellow solid;  $^1\text{H}$  NMR (600 MHz,  $\text{CDCl}_3$ )  $\delta$  8.21 (d,  $J = 8.4$  Hz, 1H), 7.19-7.16 (m, 2H), 7.00 (t,  $J = 7.2$  Hz, 1H), 4.03 (t,  $J = 9.0$  Hz, 2H), 3.18 (t,  $J = 8.4$  Hz, 2H), 2.21 (s, 3H).

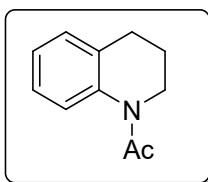

**1-(3,4-Dihydroquinolin-1(2*H*)-yl)ethan-1-one 1C**. Yellow liquid;  $^1\text{H}$  NMR (600 MHz,  $\text{CDCl}_3$ )  $\delta$  7.19-7.10 (m, 4H), 3.79-3.77 (m, 2H), 2.72-2.70 (m, 2H), 2.22 (s, 3H), 1.97-1.93 (m, 2H).

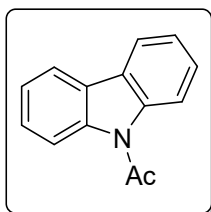

**1-(9H-carbazol-9-yl)ethan-1-one 1E.** Colorless solid;  $^1\text{H}$  NMR (600 MHz,  $\text{CDCl}_3$ )  $\delta$  8.21 (d,  $J = 8.4$  Hz, 2H), 7.99 (d,  $J = 7.8$  Hz, 2H), 7.49-7.46 (m, 2H), 7.40-7.37 (m, 2H), 2.87 (s, 3H).

### Characterization Data of the Vinylcyclopropanes and Vinylaziridine

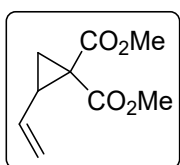

**Dimethyl 2-vinylcyclopropane-1,1-dicarboxylate 2a.** Colorless liquid;  $^1\text{H}$  NMR (500 MHz,  $\text{CDCl}_3$ )  $\delta$  5.45-5.38 (m, 1H), 5.29-5.26 (m, 1H), 5.13-5.11 (m, 1H), 3.72 (s, 6H), 2.57 (q,  $J = 8.5$  Hz, 1H), 1.72-1.69 (m, 1H), 1.58-1.55 (m, 1H).

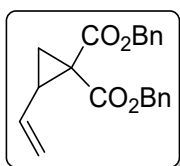

**Dibenzyl 2-vinylcyclopropane-1,1-dicarboxylate 2b.** Colorless liquid;  $^1\text{H}$  NMR (600 MHz,  $\text{CDCl}_3$ )  $\delta$  7.34-7.29 (m, 10H), 5.46-5.39 (m, 1H), 5.31-5.28 (m, 1H), 5.22-5.11 (m, 5H), 2.66 (q,  $J = 8.4$  Hz, 1H), 1.79-1.77 (m, 1H), 1.64-1.61 (m, 1H).

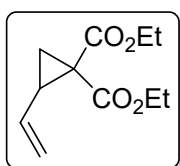

**Diethyl 2-vinylcyclopropane-1,1-dicarboxylate 2c.** Colorless liquid;  $^1\text{H}$  NMR (600 MHz,  $\text{CDCl}_3$ )  $\delta$  5.41-5.37 (m, 1H), 5.25-5.22 (m, 1H), 5.09-5.07 (m, 1H), 4.20-4.09 (m, 4H), 2.54-2.49 (m, 1H), 1.64-1.62 (m, 1H), 1.51-1.48 (m, 1H), 1.23-1.20 (m, 6H).

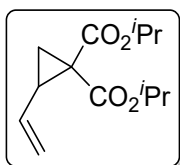

**Diisopropyl 2-vinylcyclopropane-1,1-dicarboxylate 2d.** Colorless liquid;  $^1\text{H}$  NMR (500 MHz,  $\text{CDCl}_3$ )  $\delta$  5.43-5.36 (m, 1H), 5.27-5.23 (d,  $J = 17.0$  Hz, 1H), 5.10-5.08 (m,

1H), 5.06-5.00 (m, 2H), 2.52 (q,  $J = 8.5$  Hz, 1H), 1.62-1.59 (m, 1H), 1.47-1.44 (m, 1H), 1.25-1.17 (m, 12H).

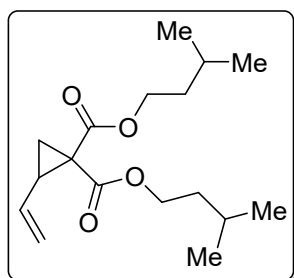

**Diisopentyl 2-vinylcyclopropane-1,1-dicarboxylate 2e.** Colorless

liquid;  $^1\text{H}$  NMR (600 MHz,  $\text{CDCl}_3$ )  $\delta$  5.44-5.38 (m, 1H), 5.28-5.26 (m, 1H), 5.12-5.10 (m, 1H), 4.19-4.09 (m, 4H), 2.55 (q,  $J = 9.0$  Hz, 1H), 1.70-1.65 (m, 4H), 1.53-1.48 (m, 4H), 0.90-0.88 (m, 12H).

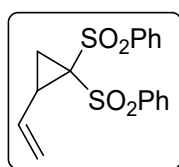

**(2-vinylcyclopropane-1,1-disulfonyl)dibenzene 2f.** Colorless solid;  $^1\text{H}$  NMR

(500 MHz,  $\text{CDCl}_3$ )  $\delta$  8.04 (d,  $J = 7.5$  Hz, 2H), 7.96 (d,  $J = 7.5$  Hz, 2H), 7.70-7.64 (m, 2H), 7.58-7.52 (m, 4H), 6.07-5.99 (m, 1H), 5.42-5.39 (m, 1H), 5.32-5.30 (m, 1H), 3.25 (q,  $J = 9.5$  Hz, 1H), 2.35-2.32 (m, 1H), 2.13-2.10 (m, 1H).

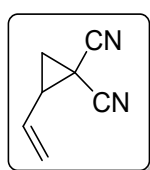

**2-vinylcyclopropane-1,1-dicarbonitrile 2g.** Colorless liquid;  $^1\text{H}$  NMR (500

MHz,  $\text{CDCl}_3$ )  $\delta$  5.64-5.57 (m, 1H), 5.54-5.49 (m, 2H), 2.69 (q,  $J = 8.5$  Hz, 1H), 2.07-2.04 (m, 1H), 1.84-1.81 (m, 1H).

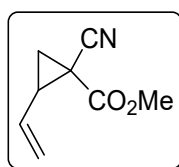

**Methyl 1-cyano-2-vinylcyclopropane-1-carboxylate 2h.** Colorless liquid;  $^1\text{H}$

NMR (500 MHz,  $\text{CDCl}_3$ )  $\delta$  5.65-5.58 (m, 1H), 5.44-5.35 (m, 2H), 3.81 (s, 3H), 2.56 (q,  $J = 8.5$  Hz, 1H), 1.99-1.95 (m, 1H), 1.67-1.64 (m, 1H).



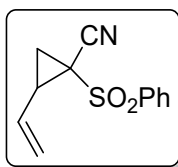

**1-(phenylsulfonyl)-2-vinylcyclopropane-1-carbonitrile 2i.** Colorless solid;  $^1\text{H}$  NMR (500 MHz,  $\text{CDCl}_3$ )  $\delta$  7.98-7.96 (m, 2H), 7.77-7.74 (m, 1H), 7.66-7.62 (m, 2H), 5.59-5.52 (m, 1H), 5.44-5.36 (m, 2H), 2.89 (q,  $J = 8.0$  Hz, 1H), 2.16-2.13 (m, 1H), 1.71-1.68 (m, 1H).

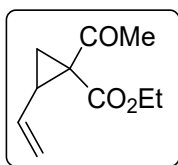

**Ethyl 1-acetyl-2-vinylcyclopropane-1-carboxylate 2j.** Colorless liquid;  $^1\text{H}$  NMR (500 MHz,  $\text{CDCl}_3$ )  $\delta$  5.51-5.44 (m, 1H), 5.29-5.26 (m, 1H), 5.13-5.11 (m, 1H), 4.24-4.19 (m, 2H), 2.59 (q,  $J = 8.5$  Hz, 1H), 2.38 (s, 3H), 1.75-1.72 (m, 1H), 1.57-1.54 (m, 1H), 1.28 (t,  $J = 7.5$  Hz, 3H).

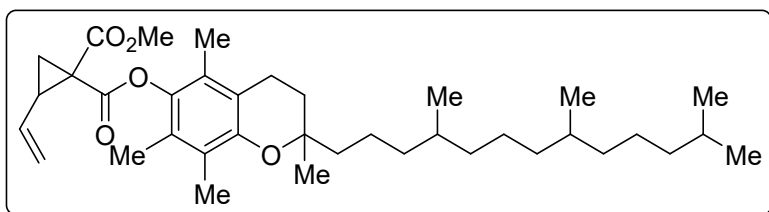

**1-Methyl 1-(2,5,7,8-tetramethyl-2-(4,8,12-trimethyltridecyl)chroman-6-yl)-2-vinylcyclopropane-1-dicarboxylate 2k.** Analytical TLC on silica gel, 1:9 ethyl acetate/hexane  $R_f = 0.45$ ; colorless liquid; yield 75% (480 mg);  $^1\text{H}$  NMR (600 MHz,  $\text{CDCl}_3$ )  $\delta$  5.55-5.50 (m, 1H), 5.38-5.35 (m, 1H), 5.21-5.19 (m, 1H), 3.80 (s, 3H), 2.75 (q,  $J = 8.4$  Hz, 1H), 2.60-2.57 (m, 2H), 2.11-1.95 (m, 9H), 1.88-1.79 (m, 2H), 1.77-1.69 (m, 2H), 1.59-1.50 (m, 3H), 1.38-1.24 (m, 14H), 1.16-1.05 (m, 7H), 0.88-0.84 (m, 12H);  $^{13}\text{C}$  NMR (150 MHz,  $\text{CDCl}_3$ )  $\delta$  168.4, 167.9, 149.7, 140.5, 132.9, 119.0, 117.6, 75.2, 52.7, 39.5, 37.7, 37.67, 37.60, 37.53, 37.4, 35.9, 32.94, 32.92, 32.86, 32.84, 31.2, 28.1, 24.96, 24.94, 24.5, 22.8, 22.7, 21.1, 21.0, 20.7, 19.89, 19.83, 19.79, 19.73, 12.8, 12.0, 11.9; FT-IR (neat) 2925, 1736, 1459, 1332, 1240, 1203, 1108, 911  $\text{cm}^{-1}$ ; HRMS (ESI)  $m/z$   $[\text{M}+\text{H}]^+$  calcd for  $\text{C}_{37}\text{H}_{59}\text{O}_5$ : 583.4357, found 583.4368.

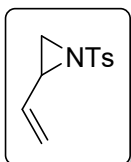

**1-Tosyl-2-vinylaziridine 2A.** Colorless liquid;  $^1\text{H NMR}$  (400 MHz,  $\text{CDCl}_3$ )  $\delta$  7.83 (d,  $J = 8.4$  Hz, 2H), 7.34 (d,  $J = 8.0$  Hz, 2H), 5.55-5.39 (m, 2H), 5.24-5.22 (m, 1H), 3.29-3.24 (m, 1H), 2.78 (d,  $J = 7.2$  Hz, 1H), 2.43 (s, 3H), 2.21 (d,  $J = 4.8$  Hz, 1H).

### Characterization Data of the Products

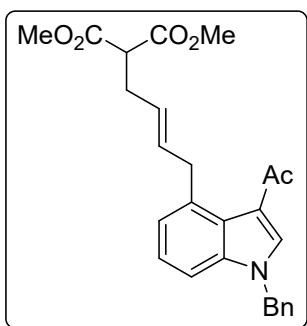

**Dimethyl (*E*)-2-(4-(3-acetyl-1-benzyl-1*H*-indol-4-yl)but-2-en-1-yl)malonate 3a.** Analytical TLC on silica gel, 1:2 ethyl acetate/hexane  $R_f = 0.45$ ; brown sticky liquid; yield 79% (34.2 mg,  $E/Z = 25:1$ );  $^1\text{H NMR}$  (600 MHz,  $\text{CDCl}_3$ )  $\delta$  7.78 (s, 1H), 7.35-7.30 (m, 3H), 7.19-7.17 (m, 1H), 7.14-7.13 (m, 3H), 7.05-7.03 (m, 1H), 5.79-5.74 (m, 1H), 5.39-5.34 (m, 1H), 5.33 (s, 2H), 4.07 (d,  $J = 7.2$  Hz, 2H), 3.64 (s, 6H), 3.39 (t,  $J = 7.8$  Hz, 1H), 2.57 (t,  $J = 7.2$  Hz, 2H), 2.52 (s, 3H);  $^{13}\text{C NMR}$  (150 MHz,  $\text{CDCl}_3$ )  $\delta$  192.2, 169.6, 138.3, 136.7, 136.2, 135.8, 134.2, 129.1, 128.3, 127.0, 125.3, 124.5, 124.0, 123.8, 119.2, 108.2, 52.4, 52.1, 50.8, 38.7, 32.1, 28.7; FT-IR (neat) 2922, 1732, 1654, 1524, 1438, 1376, 1231, 1191, 972, 749  $\text{cm}^{-1}$ ; HRMS (ESI)  $m/z$   $[\text{M}+\text{H}]^+$  calcd for  $\text{C}_{26}\text{H}_{28}\text{NO}_5$ : 434.1962, found 434.1967.

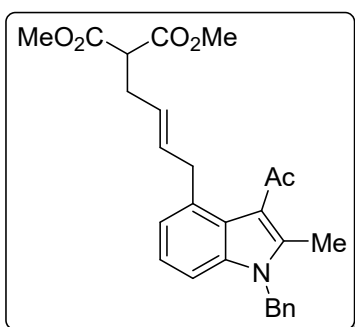

**Dimethyl (*E*)-2-(4-(3-acetyl-1-benzyl-2-methyl-1*H*-indol-4-yl)but-2-en-1-yl)malonate 3b.** Analytical TLC on silica gel, 1:2 ethyl acetate/hexane  $R_f = 0.48$ ; ; brown sticky liquid; yield 72% (32 mg,  $E/Z = 7:1$ );  $^1\text{H NMR}$  (600 MHz,  $\text{CDCl}_3$ )  $\delta$  7.29-7.26 (m, 2H), 7.24-7.23 (m, 1H), 7.16-7.09 (m, 2H), 6.98-6.97 (m, 3H), 5.70-5.65 (m, 1H), 5.42-5.37 (m, 1H), 5.32 (s, 2H), 3.76-3.66 (m, 8H), 3.42 (t,  $J = 7.8$  Hz, 1H), 2.61-2.58 (m, 5H),

2.50 (s, 3H);  $^{13}\text{C}$  NMR (150 MHz,  $\text{CDCl}_3$ )  $\delta$  198.9, 169.5, 139.1, 137.1, 136.5, 133.2, 132.7, 129.0, 127.7, 126.5, 126.0, 124.2, 122.8, 122.7, 118.3, 107.8, 52.5, 51.9, 46.7, 37.5, 32.5, 32.1, 12.3; FT-IR (neat) 2952, 1733, 1653, 1435, 1351, 1230, 1195, 972, 734  $\text{cm}^{-1}$ ; HRMS (ESI)  $m/z$   $[\text{M}+\text{H}]^+$  calcd for  $\text{C}_{27}\text{H}_{30}\text{NO}_5$ : 448.2118, found 448.2124.

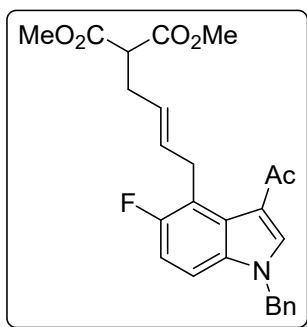

**Dimethyl (*E*)-2-(4-(3-acetyl-1-benzyl-5-fluoro-1*H*-indol-4-yl)but-2-en-1-yl)malonate 3e.** Analytical TLC on silica gel, 1:2 ethyl acetate/hexane  $R_f = 0.44$ ; ; brown sticky liquid; yield 70% (31.5 mg,  $E/Z > 25:1$ );  $^1\text{H}$  NMR (600 MHz,  $\text{CDCl}_3$ )  $\delta$  7.81 (s, 1H), 7.36-7.31 (m, 3H), 7.14-7.12 (m, 2H), 7.06-7.04 (m, 1H), 6.99-6.96 (m, 1H), 5.74-5.69 (m, 1H), 5.36-5.31 (m, 3H), 4.11 (d,  $J = 6$  Hz, 2H), 3.61 (s, 6H), 3.34 (t,  $J = 7.8$  Hz, 1H), 2.53-2.50 (m, 5H);  $^{13}\text{C}$  NMR (150 MHz,  $\text{CDCl}_3$ )  $\delta$  191.7, 169.6, 158.6 ( $J_{\text{C-F}} = 234.4$  Hz), 137.8, 135.5, 134.5, 133.0, 129.2, 128.4, 127.0, 125.8 ( $J_{\text{C-F}} = 6.0$  Hz), 125.2, 121.7 ( $J_{\text{C-F}} = 18.4$  Hz), 119.3 ( $J_{\text{C-F}} = 4.3$  Hz), 112.4 ( $J_{\text{C-F}} = 28.5$  Hz), 108.9 ( $J_{\text{C-F}} = 10.3$  Hz), 52.3, 52.1, 51.0, 32.1, 30.0 ( $J_{\text{C-F}} = 4.5$  Hz), 28.6;  $^{19}\text{F}$  NMR (565 MHz,  $\text{CDCl}_3$ )  $\delta$  -124.53; FT-IR (neat) 2952, 1730, 1655, 1523, 1438, 1392, 1204, 970, 796  $\text{cm}^{-1}$ ; HRMS (ESI)  $m/z$   $[\text{M}+\text{H}]^+$  calcd for  $\text{C}_{26}\text{H}_{27}\text{FNO}_5$ : 452.1868, found 452.1866.

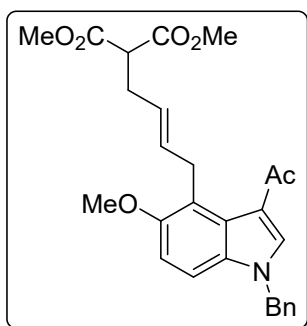

**Dimethyl (*E*)-2-(4-(3-acetyl-1-benzyl-5-methoxy-1*H*-indol-4-yl)but-2-en-1-yl)malonate 3f.** Analytical TLC on silica gel, 1:2 ethyl acetate/hexane  $R_f = 0.39$ ; brown sticky liquid; yield 68% (31.4 mg,  $E/Z > 25:1$ );  $^1\text{H}$  NMR (600 MHz,  $\text{CDCl}_3$ )  $\delta$  7.77 (s, 1H), 7.35-7.29 (m, 3H), 7.14-7.13 (m, 2H), 7.07-7.06 (m, 1H), 6.94-6.93 (m, 1H), 5.73-5.68 (m, 1H), 5.31-5.26 (m, 3H), 4.14 (d,  $J = 6.6$  Hz, 2H), 3.82 (s, 3H), 3.60 (s, 6H), 3.33 (t,  $J = 7.8$

Hz, 1H), 2.51-2.49 (m, 5H);  $^{13}\text{C}$  NMR (150 MHz,  $\text{CDCl}_3$ )  $\delta$  191.9, 169.6, 153.9, 137.8, 135.9, 133.9, 133.6, 129.1, 128.3, 127.0, 126.0, 124.4, 123.8, 118.8, 110.6, 108.4, 57.6, 52.3, 50.9, 32.2, 30.5, 28.8; FT-IR (neat) 2952, 1733, 1656, 1506, 1435, 1385, 1265, 1091, 943, 730  $\text{cm}^{-1}$ ; HRMS (ESI)  $m/z$   $[\text{M}+\text{H}]^+$  calcd for  $\text{C}_{27}\text{H}_{30}\text{NO}_6$ : 464.2068, found 464.2064.

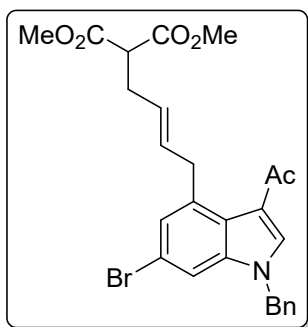

**Dimethyl (E)-2-(4-(3-acetyl-1-benzyl-6-bromo-1H-indol-4-yl)but-2-en-1-yl)malonate 3g.** Analytical TLC on silica gel, 1:2 ethyl acetate/hexane  $R_f = 0.43$ ; light yellow sticky liquid; yield 64% (32.7 mg,  $E/Z = 13:1$ );  $^1\text{H}$  NMR (600 MHz,  $\text{CDCl}_3$ )  $\delta$  7.72 (s, 1H), 7.37-7.33 (m, 3H), 7.29 (s, 1H), 7.15-7.12 (m, 3H), 5.74-5.69 (m, 1H), 5.40-5.36 (m, 1H), 5.29 (s, 2H), 4.01 (d,  $J = 6.6$  Hz, 2H), 3.67 (s, 6H), 3.40 (t,  $J = 7.8$  Hz, 1H), 2.58 (t,  $J = 7.2$  Hz, 2H), 2.50 (s, 3H);  $^{13}\text{C}$  NMR (150 MHz,  $\text{CDCl}_3$ )  $\delta$  192.0, 169.5, 139.0, 138.1, 136.9, 135.3, 133.3, 129.3, 128.5, 127.0, 126.8, 126.1, 123.6, 119.3, 117.6, 111.1, 52.5, 52.0, 50.8, 38.4, 32.1, 28.7; FT-IR (neat) 2918, 1730, 1657, 1523, 1432, 1376, 1254, 1189, 923, 701  $\text{cm}^{-1}$ ; HRMS (ESI)  $m/z$   $[\text{M}+\text{Na}]^+$  calcd for  $\text{C}_{26}\text{H}_{26}\text{BrNaNO}_5$ : 534.0887, found 534.0878.

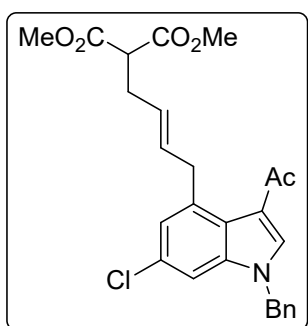

**Dimethyl (E)-2-(4-(3-acetyl-1-benzyl-6-chloro-1H-indol-4-yl)but-2-en-1-yl)malonate 3h.** Analytical TLC on silica gel, 1:2 ethyl acetate/hexane  $R_f = 0.41$ ; brown sticky liquid; yield 66% (30.8 mg,  $E/Z > 25:1$ );  $^1\text{H}$  NMR (600 MHz,  $\text{CDCl}_3$ )  $\delta$  7.74 (s, 1H), 7.37-7.33 (m, 3H), 7.13-7.12 (m, 3H), 7.01 (s, 1H), 5.74-5.70 (m, 1H), 5.41-5.36 (m, 1H), 5.29 (s, 2H), 4.02 (d,  $J = 6.6$  Hz, 2H), 3.67 (s, 6H), 3.40 (t,  $J = 7.8$  Hz, 1H), 2.58 (t,  $J = 7.8$  Hz, 2H), 2.51 (s, 3H);  $^{13}\text{C}$  NMR (150 MHz,  $\text{CDCl}_3$ )  $\delta$  192.1, 169.5, 138.7, 137.9, 137.0, 135.3, 133.2, 129.8, 129.3, 128.5, 126.9, 126.2, 124.1, 123.2, 119.3, 108.1, 52.5, 52.0, 50.9, 38.4, 32.1, 28.7;

FT-IR (neat) 2924, 1732, 1657, 1524, 1434, 1375, 1187, 1028, 972, 700  $\text{cm}^{-1}$ ; HRMS (ESI)  $m/z$   $[\text{M}+\text{H}]^+$  calcd for  $\text{C}_{26}\text{H}_{27}\text{ClNO}_5$ : 468.1572, found 468.1578.

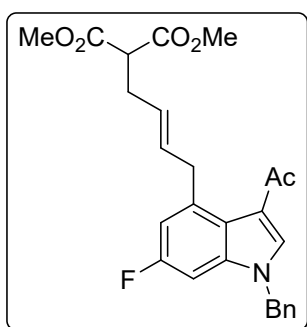

**Dimethyl (*E*)-2-(4-(3-acetyl-1-benzyl-6-fluoro-1H-indol-4-yl)but-2-en-1-yl)malonate 3i.** Analytical TLC on silica gel, 1:2 ethyl acetate/hexane  $R_f$  = 0.42; brown sticky liquid; yield 68% (30.6 mg,  $E/Z$  = 17:1);  $^1\text{H}$  NMR (600 MHz,  $\text{CDCl}_3$ )  $\delta$  7.76 (s, 1H), 7.36-7.32 (m, 3H), 7.13 (d,  $J$  = 7.2 Hz, 2H), 6.81-6.78 (m, 2H), 5.75-5.70 (m, 1H), 5.42-5.37 (m, 1H), 5.27 (s, 2H), 4.03 (d,  $J$  = 6.6 Hz, 2H), 3.67 (s, 6H), 3.40 (t,  $J$  = 7.8 Hz, 1H), 2.59 (t,  $J$  = 7.2 Hz, 2H), 2.51 (s, 3H);  $^{13}\text{C}$  NMR (150 MHz,  $\text{CDCl}_3$ )  $\delta$  192.1, 169.5, 161.3 ( $J_{\text{C-F}}$  = 239.7 Hz), 138.5 ( $J_{\text{C-F}}$  = 12.0 Hz), 138.4, 137.0 ( $J_{\text{C-F}}$  = 2.5 Hz), 135.4, 133.2, 129.2, 128.5, 127.0, 126.3, 121.0, 119.4, 112.1 ( $J_{\text{C-F}}$  = 23.5 Hz), 94.7 ( $J_{\text{C-F}}$  = 25.9 Hz), 52.5, 52.0, 51.0, 38.4, 32.1, 28.6;  $^{19}\text{F}$  NMR (471 MHz,  $\text{CDCl}_3$ )  $\delta$  -118.34.; FT-IR (neat) 2917, 1734, 1657, 1526, 1435, 1378, 1258, 1101, 955, 729  $\text{cm}^{-1}$ ; HRMS (ESI)  $m/z$   $[\text{M}+\text{H}]^+$  calcd for  $\text{C}_{26}\text{H}_{27}\text{FNO}_5$ : 452.1868, found 452.1869.

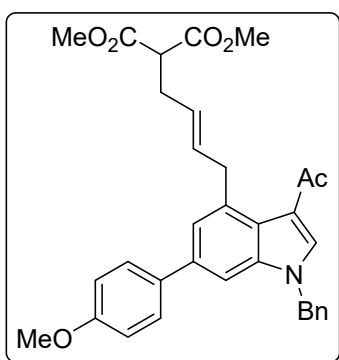

**Dimethyl (*E*)-2-(4-(3-acetyl-1-benzyl-6-(4-methoxyphenyl)-1H-indol-4-yl)but-2-en-1-yl)malonate 3j.** Analytical TLC on silica gel, 1:2 ethyl acetate/hexane  $R_f$  = 0.36; brown sticky liquid; yield 73% (39.3 mg,  $E/Z$  > 25:1);  $^1\text{H}$  NMR (600 MHz,  $\text{CDCl}_3$ )  $\delta$  7.77 (s, 1H), 7.51 (d,  $J$  = 8.4 Hz, 2H), 7.35-7.31 (m, 3H), 7.26-7.25 (m, 2H), 7.17 (d,  $J$  = 7.2 Hz, 2H), 6.96 (d,  $J$  = 9.0 Hz, 2H), 5.83-5.78 (m, 1H), 5.43-5.38 (m, 1H), 5.36 (s, 2H), 4.11 (d,  $J$  = 6.6 Hz, 2H), 3.83 (s, 3H), 3.60 (s, 6H), 3.39 (t,  $J$  = 7.8 Hz, 1H), 2.58 (t,  $J$  = 7.2 Hz, 2H), 2.52 (s, 3H);  $^{13}\text{C}$  NMR (150 MHz,  $\text{CDCl}_3$ )  $\delta$  192.1, 169.6, 159.1, 139.0, 137.1,

137.0, 136.4, 135.8, 134.2, 134.1, 129.2, 128.5, 128.3, 127.0, 125.4, 123.5, 123.4, 119.1, 114.3, 106.0, 55.5, 52.4, 52.1, 50.8, 38.8, 32.1, 28.6; FT-IR (neat) 2919, 1735, 1656, 1520, 1435, 1247, 1183, 1030, 733  $\text{cm}^{-1}$ ; HRMS (ESI)  $m/z$   $[M+H]^+$  calcd for  $\text{C}_{33}\text{H}_{34}\text{NO}_6$ : 540.2381, found 540.2380.

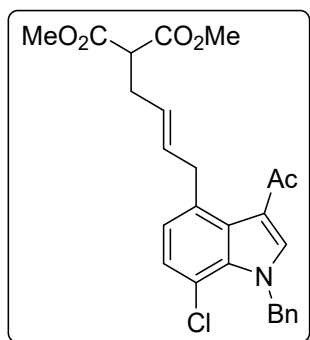

**Dimethyl (E)-2-(4-(3-acetyl-1-benzyl-7-chloro-1H-indol-4-yl)but-2-en-1-yl)malonate 3l.** Analytical TLC on silica gel, 1:2 ethyl acetate/hexane  $R_f$  = 0.42; brown sticky liquid; yield 70% (32.6 mg,  $E/Z > 25:1$ );  $^1\text{H}$  NMR (600 MHz,  $\text{CDCl}_3$ )  $\delta$  7.71 (s, 1H), 7.33-7.27 (m, 3H), 7.15 (d,  $J = 7.8$  Hz, 1H), 7.04 (d,  $J = 7.2$  Hz, 2H), 6.94 (d,  $J = 7.8$  Hz, 1H), 5.82 (s, 2H), 5.72-5.67 (m, 1H), 5.36-5.32 (m, 1H), 3.97 (d,  $J = 6.6$  Hz, 2H), 3.66 (s, 6H), 3.38 (t,  $J = 7.8$  Hz, 1H), 2.57 (t,  $J = 7.2$  Hz, 2H), 2.51 (s, 3H);  $^{13}\text{C}$  NMR (150 MHz,  $\text{CDCl}_3$ )  $\delta$  192.3, 169.5, 139.0, 137.6, 135.0, 133.5, 133.3, 129.0, 128.0, 127.4, 126.3, 125.91, 125.90, 124.5, 119.3, 115.1, 53.0, 52.5, 52.0, 38.1, 32.1, 29.0; FT-IR (neat) 2925, 1733, 1662, 1532, 1435, 1383, 1205, 968, 735  $\text{cm}^{-1}$ ; HRMS (ESI)  $m/z$   $[M+H]^+$  calcd for  $\text{C}_{26}\text{H}_{27}\text{ClNO}_5$ : 468.1572, found 468.1577.

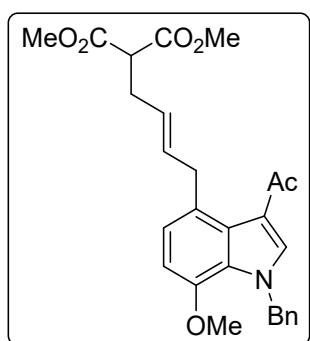

**Dimethyl (E)-2-(4-(3-acetyl-1-benzyl-7-methoxy-1H-indol-4-yl)but-2-en-1-yl)malonate 3m.** Analytical TLC on silica gel, 1:2 ethyl acetate/hexane  $R_f$  = 0.38 brown sticky liquid; yield 77% (35.6 mg,  $E/Z = 21:1$ );  $^1\text{H}$  NMR (600 MHz,  $\text{CDCl}_3$ )  $\delta$  7.65 (s, 1H), 7.31-7.29 (m, 2H), 7.27-7.26 (m, 1H), 7.10 (d,  $J = 7.8$  Hz, 2H), 6.91 (d,  $J = 7.8$  Hz, 1H), 6.65 (d,  $J = 8.4$  Hz, 1H), 5.74-5.70 (m, 1H), 5.65 (s, 2H), 5.34-5.30 (m, 1H), 3.94 (d,  $J = 6.6$  Hz, 2H), 3.76 (s, 3H), 3.65 (s, 6H), 3.38 (t,  $J = 7.8$  Hz, 1H), 2.56 (t,  $J = 7.2$  Hz, 2H), 2.49

(s, 3H);  $^{13}\text{C}$  NMR (150 MHz,  $\text{CDCl}_3$ )  $\delta$  192.4, 169.6, 146.0, 138.2, 137.6, 134.5, 128.8, 127.9, 127.8, 127.7, 126.7, 126.6, 124.9, 123.9, 119.2, 105.1, 55.6, 53.6, 52.4, 52.2, 38.0, 32.1, 28.8; FT-IR (neat) 2952, 1733, 1656, 1506, 1435, 1385, 1265, 943, 730  $\text{cm}^{-1}$ ; HRMS (ESI)  $m/z$   $[\text{M}+\text{H}]^+$  calcd for  $\text{C}_{27}\text{H}_{30}\text{NO}_6$ : 464.2068, found 464.2059.

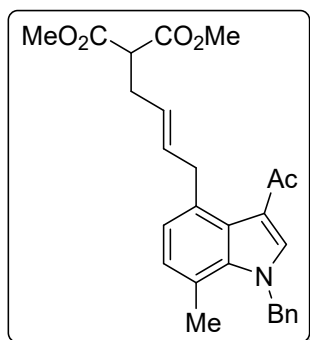

**Dimethyl (E)-2-(4-(3-acetyl-1-benzyl-7-methyl-1H-indol-4-yl)but-2-en-1-yl)malonate 3n.** Analytical TLC on silica gel, 1:2 ethyl acetate/hexane  $R_f = 0.46$ ; light brown sticky liquid; yield 75% (33.5 mg,  $E/Z > 25:1$ );  $^1\text{H}$  NMR (600 MHz,  $\text{CDCl}_3$ )  $\delta$  7.70 (s, 1H), 7.32-7.27 (m, 3H), 6.93-6.89 (m, 4H), 5.76-5.72 (m, 1H), 5.61 (s, 2H), 5.38-5.33 (m, 1H), 3.99 (d,  $J = 6.6$  Hz, 2H), 3.67 (s, 6H), 3.39 (d,  $J = 7.8$  Hz, 1H), 2.57 (t,  $J = 7.2$  Hz, 2H), 2.52 (s, 3H), 2.48 (s, 3H);  $^{13}\text{C}$  NMR (150 MHz,  $\text{CDCl}_3$ )  $\delta$  192.5, 169.6, 138.6, 138.0, 136.9, 134.2, 133.9, 129.2, 127.9, 127.2, 125.5, 125.3, 123.9, 119.19, 119.17, 53.2, 52.5, 52.1, 38.3, 32.1, 28.9, 19.5; FT-IR (neat) 2953, 1733, 1656, 1534, 1436, 1375, 1206, 1154, 944, 731  $\text{cm}^{-1}$ ; HRMS (ESI)  $m/z$   $[\text{M}+\text{H}]^+$  calcd for  $\text{C}_{27}\text{H}_{30}\text{NO}_5$ : 448.2118, found 448.2101.

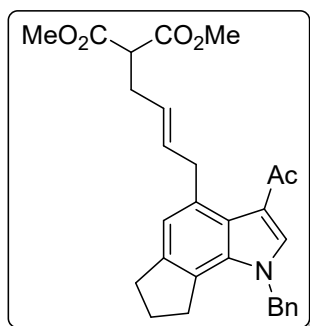

**Dimethyl (E)-2-(4-(3-acetyl-1-benzyl-1,6,7,8-tetrahydrocyclopenta[g]indol-4-yl)but-2-en-1-yl)malonate 3o.** Analytical TLC on silica gel, 1:2 ethyl acetate/hexane  $R_f = 0.44$ ; brown sticky liquid; yield 68% (32.1 mg,  $E/Z = 19:1$ );  $^1\text{H}$  NMR (600 MHz,  $\text{CDCl}_3$ )  $\delta$  7.66 (s, 1H), 7.33-7.28 (m, 3H), 7.00-6.96 (m, 3H), 5.78-5.74 (m, 1H), 5.50 (s, 2H), 5.40-5.35 (m, 1H), 4.01 (d,  $J = 6.6$  Hz, 2H), 3.67 (s, 6H), 3.40 (t,  $J = 7.8$  Hz, 1H), 3.05 (t,  $J = 7.8$  Hz, 2H), 2.93 (t,  $J = 7.8$  Hz, 2H), 2.58 (t,  $J = 7.2$  Hz, 2H), 2.50 (s, 3H), 2.07-2.03 (m, 2H);  $^{13}\text{C}$  NMR (150 MHz,  $\text{CDCl}_3$ )  $\delta$  192.4, 169.6, 141.6, 137.7, 137.1, 135.7,

134.4, 134.2, 129.1, 128.0, 125.9, 125.1, 123.5, 123.3, 120.8, 119.6, 52.5, 52.2, 52.0, 38.5, 32.6, 32.2, 31.3, 28.8, 25.4; FT-IR (neat) 2952, 1732, 1656, 1529, 1436, 1378, 1206, 1155, 965, 731  $\text{cm}^{-1}$ ; HRMS (ESI)  $m/z$   $[\text{M}+\text{H}]^+$  calcd for  $\text{C}_{29}\text{H}_{32}\text{NO}_5$ : 474.2275, found 474.2283.

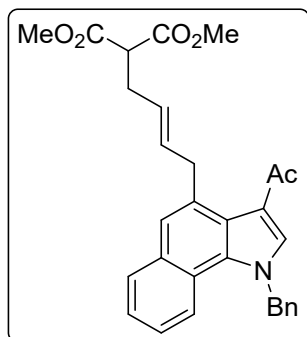

**Dimethyl (E)-2-(4-(3-acetyl-1-benzyl-1H-benzo[g]indol-4-yl)but-2-en-1-yl)malonate 3p.** Analytical TLC on silica gel, 1:2 ethyl acetate/hexane  $R_f = 0.40$ ; colorless amorphous solid; mp 110-111  $^{\circ}\text{C}$ ; yield 66% (31.8 mg,  $E/Z > 25:1$ );  $^1\text{H}$  NMR (600 MHz,  $\text{CDCl}_3$ )  $\delta$  8.04 (d,  $J = 8.4$  Hz, 1H), 7.88 (d,  $J = 8.4$  Hz, 1H), 7.77 (s, 1H), 7.45 (s, 1H), 7.39-7.36 (m, 1H), 7.35-7.32 (m, 2H), 7.31-7.28 (m, 2H), 7.11 (d,  $J = 7.8$  Hz, 2H), 5.85 (s, 2H), 5.83-5.80 (m, 1H), 5.45-5.40 (m, 1H), 4.10 (d,  $J = 6.6$  Hz, 2H), 3.66 (s, 6H), 3.42 (t,  $J = 7.8$  Hz, 1H), 2.62 (t,  $J = 7.8$  Hz, 2H), 2.59 (s, 3H);  $^{13}\text{C}$  NMR (150 MHz,  $\text{CDCl}_3$ )  $\delta$  193.2, 169.6, 136.6, 136.3, 134.4, 133.5, 132.2, 132.1, 129.3, 128.6, 128.1, 126.1, 126.0, 125.3, 124.6, 124.0, 123.1, 120.92, 120.91, 120.0, 54.6, 52.5, 52.1, 38.6, 32.2, 29.3; FT-IR (neat) 2952, 1732, 1661, 1529, 1435, 1369, 1231, 1151, 945, 736  $\text{cm}^{-1}$ ; HRMS (ESI)  $m/z$   $[\text{M}+\text{H}]^+$  calcd for  $\text{C}_{30}\text{H}_{30}\text{NO}_5$ : 484.2118, found 484.2126.

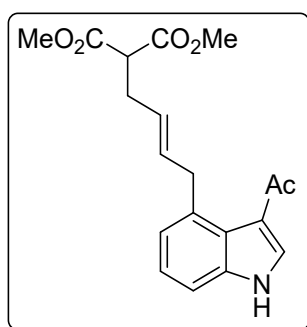

**Dimethyl (E)-2-(4-(3-acetyl-1H-indol-4-yl)but-2-en-1-yl)malonate 3q.** Analytical TLC on silica gel, 1:1 ethyl acetate/hexane  $R_f = 0.35$ ; brown amorphous solid; mp 115-116  $^{\circ}\text{C}$ ; yield 57% (19.5 mg,  $E/Z = 17:1$ );  $^1\text{H}$  NMR (600 MHz,  $\text{CDCl}_3$ )  $\delta$  8.62 (s, 1H), 7.86 (s, 1H), 7.23-7.19 (m, 2H), 7.04 (d,  $J = 7.2$  Hz, 1H), 5.78-5.73 (m, 1H), 5.37-5.32 (m, 1H), 4.05 (d,  $J = 6.6$  Hz, 2H), 3.65 (s, 6H), 3.38 (t,  $J = 7.8$  Hz, 1H), 2.58-2.56 (m, 5H);  $^{13}\text{C}$  NMR (150 MHz,  $\text{CDCl}_3$ )  $\delta$  192.6, 169.6, 137.6, 135.9, 134.2, 132.9, 125.3,



124.2, 123.8, 123.5, 120.4, 109.5, 52.5, 52.1, 38.6, 32.1, 28.7; FT-IR (KBr) 2954, 1733, 1634, 1518, 1408, 1232, 1155, 934, 751  $\text{cm}^{-1}$ ; HRMS (ESI)  $m/z$   $[\text{M}+\text{H}]^+$  calcd for  $\text{C}_{19}\text{H}_{22}\text{NO}_5$ : 344.1492, found 344.1505.

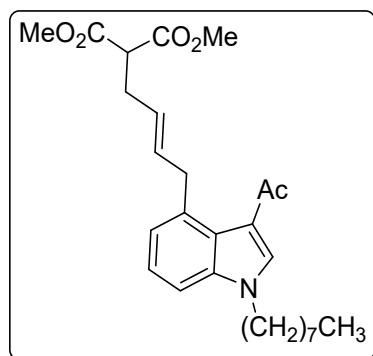

**Dimethyl (E)-2-(4-(3-acetyl-1-octyl-1H-indol-4-yl)but-2-en-1-yl)malonate 3r.** Analytical TLC on silica gel, 1:2 ethyl acetate/hexane  $R_f = 0.46$ ; light yellow sticky liquid; yield 61% (27.7 mg,  $E/Z > 25:1$ );  $^1\text{H}$  NMR (600 MHz,  $\text{CDCl}_3$ )  $\delta$  7.75 (s, 1H), 7.23-7.18 (m, 2H), 7.04 (d,  $J = 6.6$  Hz, 1H), 5.78-5.73 (m, 1H), 5.39-5.34 (m, 1H), 4.12 (t,  $J = 7.8$  Hz, 2H), 4.06 (d,  $J = 6.6$  Hz, 2H), 3.65 (s, 6H), 3.38 (t,  $J = 7.8$  Hz, 1H), 2.57-2.54 (m, 5H), 1.89-1.84 (m, 2H), 1.34-1.25 (m, 10H), 0.89-0.85 (m, 3H);  $^{13}\text{C}$  NMR (150 MHz,  $\text{CDCl}_3$ )  $\delta$  192.0, 169.6, 137.9, 136.5, 136.2, 134.3, 125.2, 124.5, 123.7, 123.6, 118.5, 107.9, 52.5, 52.1, 47.3, 38.7, 32.1, 32.0, 31.8, 29.8, 29.2, 28.6, 27.0, 22.7, 14.2; FT-IR (neat) 2925, 1734, 1654, 1524, 1434, 1376, 1275, 1152, 749  $\text{cm}^{-1}$ ; HRMS (ESI)  $m/z$   $[\text{M}+\text{H}]^+$  calcd for  $\text{C}_{27}\text{H}_{38}\text{NO}_5$ : 456.2744, found 456.2750.

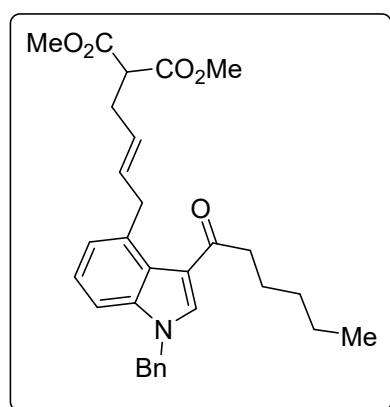

**Dimethyl (E)-2-(4-(1-benzyl-3-hexanoyl-1H-indol-4-yl)but-2-en-1-yl)malonate 3s.** Analytical TLC on silica gel, 1:2 ethyl acetate/hexane  $R_f = 0.47$ ; colorless sticky liquid; yield 59% (28.8 mg,  $E/Z > 25:1$ );  $^1\text{H}$  NMR (600 MHz,  $\text{CDCl}_3$ )  $\delta$  7.77 (s, 1H), 7.36-7.30 (m, 3H), 7.19-7.16 (m, 1H), 7.13-7.12 (m, 3H), 7.04 (d,  $J = 7.2$  Hz, 1H), 5.78-5.74 (m, 1H), 5.42-5.36 (m, 1H), 5.34 (s, 2H), 4.05 (d,  $J = 6.6$  Hz, 2H), 3.65 (s, 6H), 3.39

(t,  $J = 7.8$  Hz, 1H), 2.82 (t,  $J = 7.8$  Hz, 2H), 2.57 (t,  $J = 7.2$  Hz, 2H), 1.76-1.73 (m, 2H), 1.37-1.33 (m, 4H), 0.91-0.87 (m, 3H);  $^{13}\text{C}$  NMR (150 MHz,  $\text{CDCl}_3$ )  $\delta$  195.5, 169.6, 138.2, 136.2, 136.0, 135.8, 134.1, 129.1, 128.3, 126.9, 125.5, 124.7, 123.9, 123.6, 119.1, 108.2, 52.5, 52.1, 50.8, 40.9, 38.6, 32.1, 31.8, 25.3, 22.7, 14.1; FT-IR (neat) 2921, 2852, 1735, 1657, 1524, 1455, 1260, 1019, 799  $\text{cm}^{-1}$ ; HRMS (ESI)  $m/z$   $[\text{M}+\text{H}]^+$  calcd for  $\text{C}_{30}\text{H}_{36}\text{NO}_5$ : 490.2588, found 490.2593.

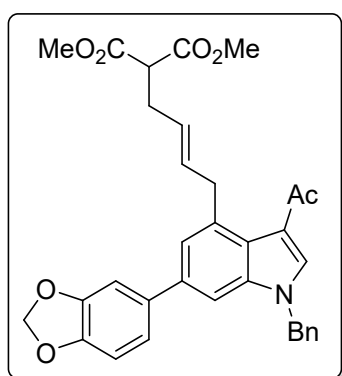

**Dimethyl (E)-2-(4-(3-acetyl-6-(benzo[d][1,3]dioxol-5-yl)-1-benzyl-1H-indol-4-yl)but-2-en-1-yl)malonate 3t.** Analytical TLC on silica gel, 1:2 ethyl acetate/hexane  $R_f = 0.37$ ; brown sticky liquid; yield 68% (37.6 mg,  $E/Z = 11:1$ );  $^1\text{H}$  NMR (600 MHz,  $\text{CDCl}_3$ )  $\delta$  7.78 (s, 1H), 7.36-7.31 (m, 3H), 7.23-7.22 (m, 2H), 7.17 (d,  $J = 7.6$  Hz, 2H), 7.05-7.03 (m, 2H), 6.87 (d,  $J = 7.8$  Hz, 1H), 5.98 (s, 2H), 5.82-5.77 (m, 1H), 5.43-5.39 (m, 1H), 5.37 (s, 2H), 4.10 (d,  $J = 6.6$  Hz, 2H), 3.61 (s, 6H), 3.39 (t,  $J = 7.8$  Hz, 1H), 2.58 (t,  $J = 7.8$  Hz, 2H), 2.53 (s, 3H);  $^{13}\text{C}$  NMR (150 MHz,  $\text{CDCl}_3$ )  $\delta$  192.1, 169.6, 148.1, 147.0, 138.9, 137.2, 137.1, 136.5, 135.9, 135.8, 134.1, 129.2, 128.4, 127.0, 125.5, 123.6, 123.5, 120.9, 119.1, 108.6, 108.0, 106.2, 101.2, 52.4, 52.1, 50.8, 38.8, 32.1, 28.6; FT-IR (neat) 2924, 1733, 1655, 1524, 1478, 1377, 1231, 1038, 933, 749  $\text{cm}^{-1}$ ; HRMS (ESI)  $m/z$   $[\text{M}+\text{H}]^+$  calcd for  $\text{C}_{33}\text{H}_{32}\text{NO}_7$ : 554.2173, found 554.2179.

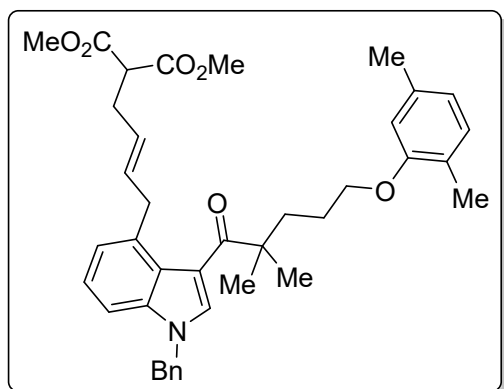

**Dimethyl (E)-2-(4-(1-benzyl-3-(5-(2,5-dimethylphenoxy))-2,2-dimethylpentanoyl)-1H-indol-4-yl)but-2-en-1-yl)malonate 3u.**

Analytical TLC on silica gel, 1:3 ethyl acetate/hexane  $R_f = 0.42$ ; colorless amorphous solid; mp 105-106 °C; yield 61% (38.0 mg,  $E/Z > 25:1$ );  $^1\text{H}$  NMR (600 MHz,  $\text{CDCl}_3$ )  $\delta$  7.61 (s, 1H), 7.31-7.28 (m, 3H), 7.18-7.15 (m, 1H), 7.13-7.08 (m, 3H), 7.00-6.96 (m, 2H), 6.64 (d,  $J = 7.2$  Hz, 1H), 6.57 (s, 1H), 5.78-5.73 (m, 1H), 5.43-5.38 (m, 1H), 5.29 (s, 2H), 3.90 (t,  $J = 6.0$  Hz, 2H), 3.69-3.68 (m, 8H), 3.42 (t,  $J = 7.8$  Hz, 1H), 2.60 (t,  $J = 7.2$  Hz, 2H), 2.27 (s, 3H), 2.11 (s, 3H), 1.98-1.95 (m, 2H), 1.84-1.80 (m, 2H), 1.37 (s, 6H);  $^{13}\text{C}$  NMR (150 MHz,  $\text{CDCl}_3$ )  $\delta$  204.5, 169.5, 157.0, 136.9, 136.6, 136.3, 135.1, 133.0, 130.7, 130.3, 129.0, 128.1, 126.8, 126.4, 125.7, 123.5, 123.4, 122.7, 120.8, 116.6, 112.1, 108.2, 68.2, 52.5, 52.0, 50.6, 48.0, 38.0, 37.3, 32.1, 29.8, 27.0, 25.2, 21.5, 15.9; FT-IR (KBr) 2953, 1736, 1649, 1253, 1436, 1389, 1264, 1156, 1129, 1042, 731  $\text{cm}^{-1}$ ; HRMS (ESI)  $m/z$   $[\text{M}+\text{H}]^+$  calcd for  $\text{C}_{39}\text{H}_{46}\text{NO}_6$ : 624.3320, found 624.3328.

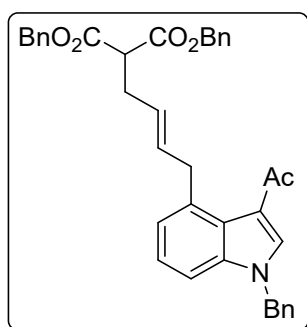

**Dibenzyl (*E*)-2-(4-(3-acetyl-1-benzyl-1*H*-indol-4-yl)but-2-en-1-yl)malonate 3v.** Analytical TLC on silica gel, 1:2 ethyl acetate/hexane  $R_f = 0.42$ ; brown sticky liquid; yield 66% (38.6 mg,  $E/Z > 25:1$ );  $^1\text{H}$  NMR (600 MHz,  $\text{CDCl}_3$ )  $\delta$  7.78 (s, 1H), 7.33-7.28 (m, 9H), 7.23-7.22 (m, 4H), 7.18-7.15 (m, 1H), 7.13-7.12 (m, 3H), 7.03 (d,  $J = 7.2$  Hz, 1H), 5.78-5.74 (m, 1H), 5.41-5.36 (m, 1H), 5.32 (s, 2H), 5.07-5.02 (m, 4H), 4.05 (d,  $J = 6.6$  Hz, 2H), 3.48 (t,  $J = 7.8$  Hz, 1H), 2.61 (t,  $J = 7.2$  Hz, 2H), 2.51 (s, 3H);  $^{13}\text{C}$  NMR (150 MHz,  $\text{CDCl}_3$ )  $\delta$  192.2, 168.8, 138.3, 136.7, 136.2, 135.8, 135.5, 134.3, 129.1, 128.6, 128.33, 128.31, 128.2, 127.0, 125.2, 124.5, 124.0, 123.9, 119.2, 108.2, 67.0, 52.4, 50.8, 38.7, 32.0, 28.7; FT-IR (neat) 2925, 1731, 1655, 1524, 1453, 1389, 1207, 1151, 748  $\text{cm}^{-1}$ ; HRMS (ESI)  $m/z$   $[\text{M}+\text{H}]^+$  calcd for  $\text{C}_{38}\text{H}_{36}\text{NO}_5$ : 586.2588, found 586.2595.

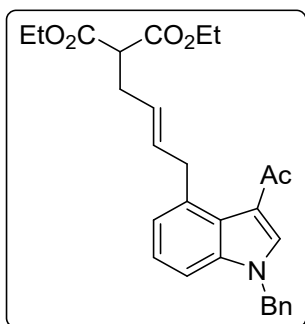

**Diethyl (E)-2-(4-(3-acetyl-1-benzyl-1H-indol-4-yl)but-2-en-1-yl)malonate 3w.** Analytical TLC on silica gel, 1:2 ethyl acetate/hexane  $R_f = 0.46$ ; brown sticky liquid; yield 73% (33.6 mg,  $E/Z > 25:1$ );  $^1\text{H}$  NMR (600 MHz,  $\text{CDCl}_3$ )  $\delta$  7.77 (s, 1H), 7.35-7.29 (m, 3H), 7.19-7.16 (m, 1H), 7.15-7.12 (m, 3H), 7.05 (d,  $J = 7.2$  Hz, 1H), 5.78-5.74 (m, 1H), 5.40-5.36 (m, 1H), 5.33 (s, 2H), 4.14-4.08 (m, 4H), 4.06 (d,  $J = 6.6$  Hz, 2H), 3.34 (t,  $J = 7.8$  Hz, 1H), 2.56 (t,  $J = 7.2$  Hz, 2H), 2.52 (s, 3H), 1.19 (t,  $J = 7.2$  Hz, 6H);  $^{13}\text{C}$  NMR (150 MHz,  $\text{CDCl}_3$ )  $\delta$  192.2, 169.2, 138.3, 136.6, 136.3, 135.8, 133.9, 129.1, 128.3, 127.0, 125.6, 124.5, 124.0, 123.9, 119.2, 108.2, 61.3, 52.4, 50.8, 38.7, 32.1, 28.7, 14.1; FT-IR (neat) 2918, 2850, 1729, 1656, 1524, 1441, 1373, 1150, 1030, 748  $\text{cm}^{-1}$ ; HRMS (ESI)  $m/z$   $[\text{M}+\text{H}]^+$  calcd for  $\text{C}_{28}\text{H}_{32}\text{NO}_5$ : 462.2275, found 462.2279.

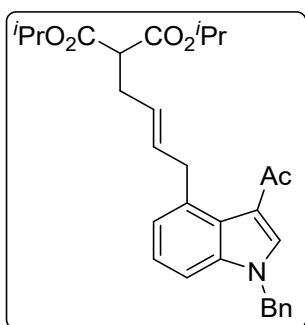

**Diisopropyl (E)-2-(4-(3-acetyl-1-benzyl-1H-indol-4-yl)but-2-en-1-yl)malonate 3x.** Analytical TLC on silica gel, 1:2 ethyl acetate/hexane  $R_f = 0.45$ ; light brown sticky liquid; yield 46% (22.4 mg,  $E/Z = 2:1$ );  $^1\text{H}$  NMR (600 MHz,  $\text{CDCl}_3$ )  $\delta$  7.79 (s, 0.56H), 7.77 (s, 1H), 7.40-7.30 (m, 5.42H), 7.19-7.11 (m, 6.38H), 7.05-7.04 (m, 1.05H), 6.09-6.04 (m, 0.63H), 5.77-5.72 (m, 1.17H), 5.42-5.39 (m, 0.60H), 5.38-5.35 (m, 1.14H), 5.34-5.33 (m, 3.28H), 5.07-5.03 (m, 1.25H), 5.00-4.95 (m, 2.31H), 4.15 (d,  $J = 6.6$  Hz, 0.85H), 4.06 (d,  $J = 6.6$  Hz, 1.93H), 3.38 (t,  $J = 7.8$  Hz, 0.63H), 3.27 (t,  $J = 7.8$  Hz, 1.16H), 2.55-2.51 (m, 6.49H), 2.39-2.35 (m, 0.64H), 2.13-2.10 (m, 1.19H), 1.25-1.15 (m, 18H);  $^{13}\text{C}$  NMR (150 MHz,  $\text{CDCl}_3$ )  $\delta$  192.3, 192.2, 169.3, 168.8, 138.4, 138.4, 138.3, 137.0, 136.6, 136.3, 135.9, 135.8, 133.8, 133.7, 132.5, 129.38, 129.36, 129.1, 128.3, 127.0, 126.9, 125.7, 124.6, 124.03, 124.00, 123.9, 123.6, 120.3, 119.3, 119.2, 108.9, 108.2, 68.8, 68.7, 52.8, 52.0, 50.8, 38.6, 31.9, 31.0, 28.75,

28.72, 21.8, 21.76, 21.74, 21.6; FT-IR (neat) 2926, 1724, 1656, 1524, 1441, 1374, 1189, 1102, 746  $\text{cm}^{-1}$ ; HRMS (ESI)  $m/z$   $[M+H]^+$  calcd for  $\text{C}_{30}\text{H}_{36}\text{NO}_5$ : 490.2588, found 490.2595.

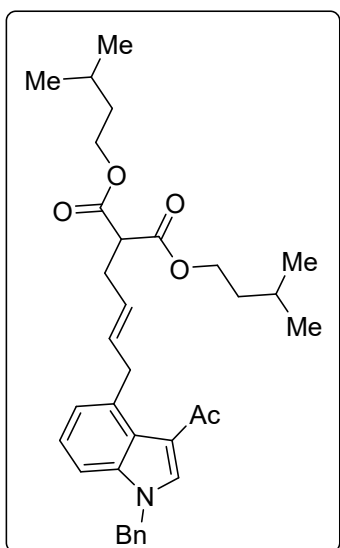

**Diisopentyl (*E*)-2-(4-(3-acetyl-1-benzyl-1*H*-indol-4-yl)but-2-en-1-yl)malonate 3y.** Analytical TLC on silica gel, 1:4 ethyl acetate/hexane  $R_f = 0.46$ ; brown sticky liquid; yield 52% (28.3 mg,  $E/Z = 5:1$ );  $^1\text{H}$  NMR (600 MHz,  $\text{CDCl}_3$ )  $\delta$  7.77 (s, 1H), 7.35-7.30 (m, 3H), 7.19-7.12 (m, 4H), 7.05 (d,  $J = 7.2$  Hz, 1H), 5.79-5.74 (m, 1H), 5.41-5.36 (m, 1H), 5.33 (s, 2H), 4.12-4.05 (m, 4H), 3.74-3.70 (m, 2H), 3.38-3.33 (m, 1H), 2.58-2.55 (m, 2H), 2.52 (s, 3H), 1.66-1.62 (m, 2H), 1.52-1.45 (m, 4H), 0.90-0.85 (m, 12H);  $^{13}\text{C}$  NMR (150 MHz,  $\text{CDCl}_3$ )  $\delta$  192.2, 169.3, 138.3, 136.6, 136.3, 135.8, 133.9, 129.1, 128.3, 127.1, 127.0, 125.6, 124.6, 124.0, 123.9, 108.2, 64.0, 52.6, 50.8, 38.6, 37.2, 32.1, 28.7, 25.0, 22.5; FT-IR (neat) 2957, 1729, 1655, 1525, 1440, 1388, 1190, 971, 746  $\text{cm}^{-1}$ ; HRMS (ESI)  $m/z$   $[M+H]^+$  calcd for  $\text{C}_{34}\text{H}_{44}\text{NO}_5$ : 546.3214, found 546.3218.

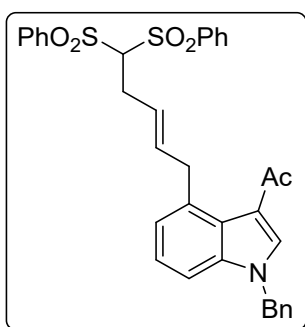

**(*E*)-1-(1-benzyl-4-(5,5-bis(phenylsulfonyl)pent-2-en-1-yl)-1*H*-indol-3-yl)ethan-1-one 3z.** Analytical TLC on silica gel, 1:2 ethyl acetate/hexane  $R_f = 0.41$ ; colorless sticky liquid; yield 61% (36.4 mg,  $E/Z > 25:1$ );  $^1\text{H}$  NMR (400 MHz,  $\text{CDCl}_3$ )  $\delta$  7.91-7.88 (m, 4H), 7.81 (s, 1H), 7.64-7.60 (m, 2H), 7.51-7.47 (m, 4H), 7.34-7.29 (m, 3H), 7.20-7.14

(m, 4H), 7.01-6.99 (m, 1H), 5.64-5.57 (m, 1H), 5.35-5.28 (m, 3H), 4.41 (t,  $J = 6.4$  Hz, 1H), 4.01 (d,  $J = 6.4$  Hz, 2H), 2.80 (t,  $J = 6.4$  Hz, 2H), 2.53 (s, 3H);  $^{13}\text{C}$  NMR (150 MHz,  $\text{CDCl}_3$ )  $\delta$  192.2, 138.3, 138.1, 137.0, 135.85, 135.81, 135.6, 134.5, 129.8, 129.2, 129.1, 128.3, 127.0, 124.6, 124.2, 124.0, 123.4, 119.1, 108.4, 84.2, 50.9, 38.7, 29.8, 29.0, 28.7; FT-IR (neat) 2924, 2854, 1652, 1524, 1447, 1376, 1330, 1153, 1079, 734  $\text{cm}^{-1}$ ; HRMS (ESI)  $m/z$   $[\text{M}+\text{H}]^+$  calcd for  $\text{C}_{34}\text{H}_{32}\text{S}_2\text{NO}_5$ : 598.1716, found 598.1719.

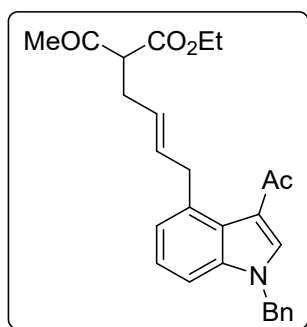

**Ethyl (*E*)-2-acetyl-6-(3-acetyl-1-benzyl-1*H*-indol-4-yl)hex-4-**

**enoate 3ad.** Analytical TLC on silica gel, 1:2 ethyl acetate/hexane  $R_f = 0.44$ ; light yellow sticky liquid; yield 45% (19.3 mg,  $E/Z = 10:1$ );  $^1\text{H}$  NMR (400 MHz,  $\text{CDCl}_3$ )  $\delta$  7.78 (s, 1H), 7.35-7.30 (m, 3H), 7.18-7.12 (m, 4H), 7.04-7.02 (m, 1H), 5.79-5.72 (m, 1H), 5.37-5.29 (m, 3H), 4.21-4.09 (m, 2H), 4.08-4.04 (m, 2H), 3.44 (t,  $J = 7.6$  Hz, 1H), 2.52 (s, 3H), 2.27-2.21 (m, 2H), 2.16 (s, 3H), 1.18 (t,  $J = 7.2$  Hz, 3H);  $^{13}\text{C}$  NMR (100 MHz,  $\text{CDCl}_3$ )  $\delta$  203.2, 192.2, 169.5, 138.3, 136.7, 136.2, 135.8, 134.0, 129.1, 128.3, 127.0, 125.6, 124.5, 124.0, 123.9, 119.1, 108.2, 61.3, 60.0, 50.8, 38.6, 31.5, 29.3, 28.7, 14.1; FT-IR (neat) 2923, 2853, 1712, 1653, 1524, 1440, 1373, 1189, 1022, 970, 736  $\text{cm}^{-1}$ ; HRMS (ESI)  $m/z$   $[\text{M}+\text{Na}]^+$  calcd for  $\text{C}_{27}\text{H}_{29}\text{NaNO}_4$ : 454.1989, found 454.1986.

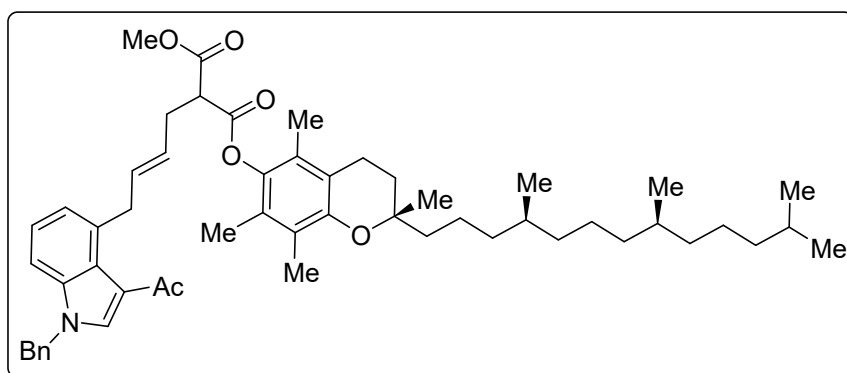

**1-Methyl 3-((*S*)-2,5,7,8-**  
**tetramethyl-2-((4*S*,8*S*)-4,8,12-trimethyltridecyl)chroman-6-yl) 2-((*E*)-4-(3-acetyl-1-**

**benzyl-1*H*-indol-4-yl)but-2-en-1-yl)malonate 3ae.** Analytical TLC on silica gel, 1:2 ethyl acetate/hexane  $R_f = 0.43$ ; brown sticky liquid; yield 57% (47.4 mg,  $E/Z = 3:1$ );  $^1\text{H}$  NMR (600 MHz,  $\text{CDCl}_3$ )  $\delta$  7.78 (s, 1H), 7.35-7.30 (m, 3H), 7.20-7.14 (m, 4H), 7.07 (d,  $J = 7.2$  Hz, 1H),

5.88-5.84 (m, 1H), 5.49-5.44 (m, 1H), 5.33 (s, 2H), 4.11-4.09 (m, 2H), 3.70 (s, 3H), 3.66 (t,  $J = 7.8$  Hz, 1H), 2.73 (t,  $J = 7.2$  Hz, 2H), 2.58-2.54 (m, 2H), 2.53 (s, 3H), 2.06 (s, 3H), 1.98-1.92 (m, 6H), 1.82-1.77 (m, 2H), 1.56-1.49 (m, 3H), 1.37-1.22 (m, 14H), 1.15-1.09 (m, 7H), 0.87-0.84 (m, 12H);  $^{13}\text{C}$  NMR (150 MHz,  $\text{CDCl}_3$ )  $\delta$  192.2, 169.4, 167.6, 149.6, 140.4, 138.3, 136.7, 136.1, 135.8, 134.4, 132.9, 129.1, 128.3, 127.0, 125.4, 124.6, 124.0, 123.1, 120.4, 119.2, 117.5, 109.0, 108.2, 75.2, 52.4, 52.2, 50.8, 39.5, 38.7, 37.7, 37.6, 37.5, 37.4, 32.93, 32.91, 32.8, 32.2, 28.7, 28.1, 24.95, 24.94, 24.5, 22.8, 22.7, 21.1, 20.7, 19.9, 19.8, 19.79, 19.76, 19.72, 11.9; FT-IR (neat) 2925, 1740, 1658, 1525, 1440, 1376, 1191, 1151, 741  $\text{cm}^{-1}$ ; HRMS (ESI)  $m/z$   $[\text{M}+\text{H}]^+$  calcd for  $\text{C}_{54}\text{H}_{74}\text{NO}_6$ : 832.5511, found 832.5501.

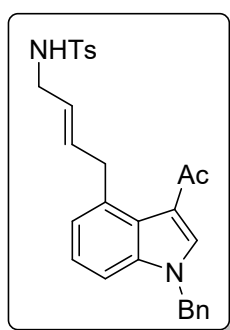

**(*E*)-*N*-(4-(3-acetyl-1-benzyl-1*H*-indol-4-yl)but-2-en-1-yl)-4-**

**methylbenzenesulfonamide 3A.** Analytical TLC on silica gel, 1:2 ethyl acetate/hexane  $R_f = 0.35$ ; brown sticky liquid; yield 50% (23.6 mg,  $E/Z > 25:1$ );  $^1\text{H}$  NMR (600 MHz,  $\text{CDCl}_3$ )  $\delta$  7.79 (s, 1H), 7.69 (d,  $J = 8.4$  Hz, 2H), 7.35-7.30 (m, 4H), 7.26 (s, 1H), 7.19-7.14 (m, 4H), 6.98-6.97 (m, 1H), 5.85-5.81 (m, 1H), 5.34 (s, 2H), 5.30-5.25 (m, 1H), 4.28 (t,  $J = 6.0$  Hz, 1H), 4.02 (d,  $J = 6.6$  Hz, 2H), 3.47 (t,  $J = 6.6$  Hz, 2H), 2.50 (s, 3H), 2.40 (s, 3H);  $^{13}\text{C}$  NMR (150 MHz,  $\text{CDCl}_3$ )  $\delta$  192.2, 143.4, 138.3, 137.1, 137.0, 135.9, 135.7, 135.3, 129.7, 129.2, 128.4, 127.2, 127.0, 126.6, 124.5, 124.3, 124.0, 118.9, 108.5, 50.9, 45.6, 38.5, 28.6, 21.6; FT-IR (neat) 3267, 2924, 1644, 1524, 1442, 1379, 1326, 1157, 1093  $\text{cm}^{-1}$ ; HRMS (ESI)  $m/z$   $[\text{M}+\text{H}]^+$  calcd for  $\text{C}_{28}\text{H}_{29}\text{N}_2\text{O}_3\text{S}$ : 473.1893, found 473.1893.

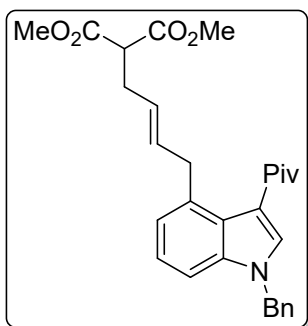

**Dimethyl (*E*)-2-(4-(1-benzyl-3-pivaloyl-1*H*-indol-4-yl)but-2-en-1-yl)malonate **3a'****. Analytical TLC on silica gel, 1:4 ethyl acetate/hexane  $R_f = 0.46$ ; light brown amorphous solid; mp 103-104 °C; yield 55% (26.1 mg,  $E/Z > 25:1$ );  $^1\text{H}$  NMR (500 MHz,  $\text{CDCl}_3$ )  $\delta$  7.55 (s, 1H), 7.33-7.28 (m, 3H), 7.18-7.11 (m, 4H), 6.99 (d,  $J = 6.5$  Hz, 1H), 5.75-5.69 (m, 1H), 5.41-5.35 (m, 1H), 5.33 (s, 2H), 3.68-3.65 (m, 8H), 3.41 (t,  $J = 8.0$  Hz, 1H), 2.59 (t,  $J = 7.5$  Hz, 2H), 1.36 (s, 9H);  $^{13}\text{C}$  NMR (150 MHz,  $\text{CDCl}_3$ )  $\delta$  205.6, 169.6, 136.9, 136.3, 135.0, 132.9, 130.6, 129.1, 128.1, 126.9, 126.3, 125.7, 123.4, 122.5, 116.3, 108.2, 52.5, 52.0, 50.6, 44.8, 37.1, 32.1, 28.7; FT-IR (KBr) 2953, 1735, 1650, 1524, 1437, 1390, 1183, 971, 731  $\text{cm}^{-1}$ ; HRMS (ESI)  $m/z$   $[\text{M}+\text{H}]^+$  calcd for  $\text{C}_{29}\text{H}_{34}\text{NO}_5$ : 476.2431, found 476.2438.

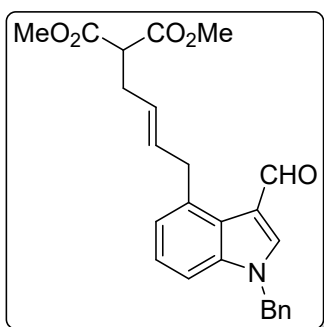

**Dimethyl (*E*)-2-(4-(1-benzyl-3-formyl-1*H*-indol-4-yl)but-2-en-1-yl)malonate **3b'****. Analytical TLC on silica gel, 1:3 ethyl acetate/hexane  $R_f = 0.44$ ; brown sticky liquid; yield 41% (17.1 mg,  $E/Z = 15:1$ );  $^1\text{H}$  NMR (600 MHz,  $\text{CDCl}_3$ )  $\delta$  9.98 (s, 1H), 7.81 (s, 1H), 7.36-7.32 (m, 3H), 7.23-7.17 (m, 4H), 7.08 (d,  $J = 6.6$  Hz, 1H), 5.83-5.78 (m, 1H), 5.43-5.38 (m, 1H), 5.34 (s, 2H), 3.99 (d,  $J = 6.0$  Hz, 2H), 3.66 (s, 6H), 3.39 (t,  $J = 7.8$  Hz, 1H), 2.59 (t,  $J = 7.2$  Hz, 2H);  $^{13}\text{C}$  NMR (150 MHz,  $\text{CDCl}_3$ )  $\delta$  184.4, 169.5, 139.2, 138.3, 135.3, 135.1, 132.7, 129.2, 128.5, 127.3, 126.5, 124.6, 124.1, 123.8, 119.7, 108.8, 52.5, 52.0, 51.2, 38.4, 32.0; FT-IR (neat) 1734, 1669, 1526, 1439, 1389, 1275, 1162, 750  $\text{cm}^{-1}$ ; HRMS (ESI)  $m/z$   $[\text{M}+\text{H}]^+$  calcd for  $\text{C}_{25}\text{H}_{26}\text{NO}_5$ : 420.1805, found 420.1811.



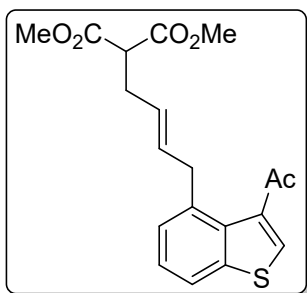

**Dimethyl (E)-2-(4-(3-acetylbenzo[b]thiophen-4-yl)but-2-en-1-yl)malonate 4A.** Analytical TLC on silica gel, 1:9 ethyl acetate/hexane  $R_f = 0.50$ ; light yellow liquid; yield 55% (19.8 mg,  $E/Z > 25:1$ );  $^1\text{H}$  NMR (500 MHz,  $\text{CDCl}_3$ )  $\delta$  7.96 (s, 1H), 7.74 (d,  $J = 8.0$  Hz, 1H), 7.34 (t,  $J = 8.0$  Hz, 1H), 7.24-7.22 (m, 1H), 5.63-5.57 (m, 1H), 5.31-5.26 (m, 1H), 3.70 (d,  $J = 6.5$  Hz, 2H), 3.66 (s, 6H), 3.38 (t,  $J = 8.0$  Hz, 1H), 2.66 (s, 3H), 2.57 (t,  $J = 7.5$  Hz, 2H);  $^{13}\text{C}$  NMR (150 MHz,  $\text{CDCl}_3$ )  $\delta$  196.3, 169.4, 141.4, 140.1, 137.3, 134.2, 132.9, 132.4, 127.3, 127.0, 125.6, 120.9, 52.5, 51.8, 38.1, 32.0, 30.3; FT-IR (neat) 2923, 1735, 1681, 1435, 1209, 1155, 975, 760  $\text{cm}^{-1}$ ; HRMS (ESI)  $m/z$   $[\text{M}+\text{H}]^+$  calcd for  $\text{C}_{19}\text{H}_{21}\text{O}_5\text{S}$ : 361.1104, found 361.1113.

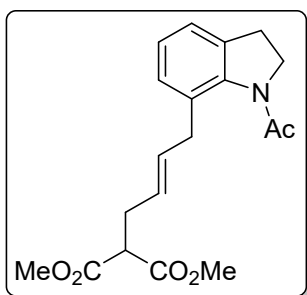

**Dimethyl (E)-2-(4-(1-acetylidolin-7-yl)but-2-en-1-yl)malonate 4B.** Analytical TLC on silica gel, 1:2 ethyl acetate/hexane  $R_f = 0.48$ ; brown sticky liquid; yield 70% (24.1 mg,  $E/Z > 25:1$ );  $^1\text{H}$  NMR (600 MHz,  $\text{CDCl}_3$ )  $\delta$  7.07-6.99 (m, 3H), 5.63-5.58 (m, 1H), 5.47-5.43 (m, 1H), 4.07-4.04 (m, 2H), 3.70 (s, 6H), 3.42 (t,  $J = 7.8$  Hz, 1H), 3.35-3.34 (m, 2H), 3.01 (t,  $J = 7.2$  Hz, 2H), 2.61 (t,  $J = 7.2$  Hz, 2H), 2.26 (s, 3H);  $^{13}\text{C}$  NMR (150 MHz,  $\text{CDCl}_3$ )  $\delta$  169.5, 140.9, 131.8, 128.8, 126.9, 125.4, 122.3, 52.5, 52.0, 51.3, 37.0, 32.0, 30.1, 23.9; FT-IR (neat) 2954, 1733, 1662, 1435, 1386, 1232, 1152, 974, 732  $\text{cm}^{-1}$ ; HRMS (ESI)  $m/z$   $[\text{M}+\text{H}]^+$  calcd for  $\text{C}_{19}\text{H}_{24}\text{NO}_5$ : 346.1649, found 346.1643.

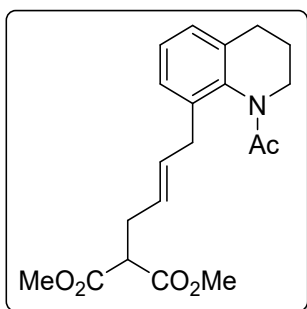

**Dimethyl (*E*)-2-(4-(1-acetyl-1,2,3,4-tetrahydroquinolin-8-yl)but-2-en-1-yl)malonate 4C.** Analytical TLC on silica gel, 1:2 ethyl acetate/hexane  $R_f = 0.49$ ; brown liquid; yield 39% (14.0 mg,  $E/Z = 2:1$ );  $^1\text{H}$  NMR (600 MHz,  $\text{CDCl}_3$ )  $\delta$  7.17-7.14 (m, 1.36H), 7.11-7.08 (m, 1.53H), 7.06-6.99 (m, 1.63H), 5.62-5.54 (m, 1.57H), 5.47-5.41 (m, 1.57H), 4.81-4.76 (m, 1.57H), 3.74-3.70 (m, 8.95H), 3.44-3.41 (m, 1.49H), 3.37-3.33 (m, 1.55H), 3.21 (d,  $J = 7.2$  Hz, 1H), 3.18 (d,  $J = 7.2$  Hz, 0.51H), 2.78-2.73 (m, 1.57H), 2.66-2.63 (m, 1.49H), 2.62-2.59 (m, 3.25H), 2.44-2.39 (m, 1.61H), 2.29-2.23 (m, 3.13H), 1.86 (s, 3.64H);  $^{13}\text{C}$  NMR (150 MHz,  $\text{CDCl}_3$ )  $\delta$  171.13, 171.10, 169.43, 169.40, 139.5, 137.7, 135.6, 132.1, 131.3, 130.5, 128.1, 127.7, 127.4, 127.0, 126.9, 126.5, 126.3, 126.2, 125.8, 122.9, 52.65, 52.63, 52.0, 51.8, 46.1, 41.5, 35.2, 34.0, 32.0, 31.9, 26.6, 26.0, 24.7, 24.0, 22.5, 21.6; FT-IR (neat) 2924, 1736, 1659, 1437, 1378, 1234, 1154, 971, 766  $\text{cm}^{-1}$ ; HRMS (ESI)  $m/z$   $[\text{M}+\text{H}]^+$  calcd for  $\text{C}_{20}\text{H}_{26}\text{NO}_5$ : 360.1805, found 360.1813.

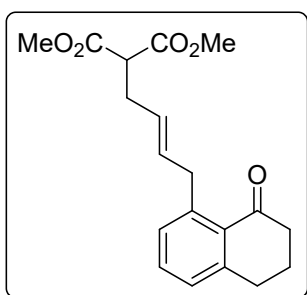

**Dimethyl (*E*)-2-(4-(8-oxo-5,6,7,8-tetrahydronaphthalen-1-yl)but-2-en-1-yl)malonate 4D.** Analytical TLC on silica gel, 1:9 ethyl acetate/hexane  $R_f = 0.46$ ; colorless sticky liquid; yield 41% (13.5 mg,  $E/Z > 25:1$ );  $^1\text{H}$  NMR (600 MHz,  $\text{CDCl}_3$ )  $\delta$  7.30 (t,  $J = 7.8$  Hz, 1H), 7.11 (d,  $J = 7.2$  Hz, 1H), 7.08 (d,  $J = 7.2$  Hz, 1H), 5.77-5.72 (m, 1H), 5.43-5.38 (m, 1H), 3.76 (d,  $J = 6.6$  Hz, 2H), 3.68 (s, 6H), 3.40 (t,  $J = 7.8$  Hz, 1H), 2.94 (t,  $J = 6.0$  Hz, 2H), 2.64 (t,  $J = 6.6$  Hz, 2H), 2.59 (t,  $J = 7.2$  Hz, 2H), 2.10-2.04 (m, 2H);  $^{13}\text{C}$  NMR (150 MHz,  $\text{CDCl}_3$ )  $\delta$  200.1, 169.5, 146.0, 143.4, 132.9, 132.5, 130.8, 129.5, 127.3, 126.3, 52.5, 52.0, 41.1, 38.0, 32.0, 31.2, 23.0; FT-IR (neat) 2925, 2853, 1737, 1678, 1591, 1436, 1273, 1155, 762  $\text{cm}^{-1}$ ; HRMS (ESI)  $m/z$   $[\text{M}+\text{H}]^+$  calcd for  $\text{C}_{19}\text{H}_{23}\text{O}_5$ : 331.1540, found 331.1546.

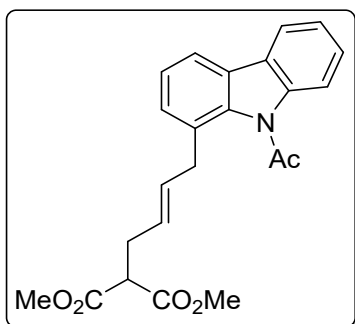

**Dimethyl (E)-2-(4-(9-acetyl-9H-carbazol-1-yl)but-2-en-1-**

**yl)malonate 4E.** Analytical TLC on silica gel, 1:2 ethyl acetate/hexane  $R_f = 0.43$ ; colorless liquid; yield 36% (14.4 mg,  $E/Z > 25:1$ );  $^1\text{H}$  NMR (600 MHz,  $\text{CDCl}_3$ )  $\delta$  7.97 (d,  $J = 7.8$  Hz, 1H), 7.85 (t,  $J = 7.8$  Hz, 2H), 7.45 (t,  $J = 7.8$  Hz, 1H), 7.37-7.34 (m, 2H), 7.28-7.27 (m, 1H), 5.59-5.55 (m, 1H), 5.52-5.47 (m, 1H), 3.66 (s, 6H), 3.58 (d,  $J = 6.0$  Hz, 2H), 3.42 (t,  $J = 7.8$  Hz, 1H), 2.74 (s, 3H), 2.62 (t,  $J = 7.2$  Hz, 2H);  $^{13}\text{C}$  NMR (150 MHz,  $\text{CDCl}_3$ )  $\delta$  170.7, 169.4, 139.6, 138.3, 131.1, 129.3, 129.1, 128.0, 127.7, 127.1, 126.9, 124.4, 123.4, 120.2, 117.9, 114.4, 52.6, 51.8, 37.7, 31.9, 27.2; FT-IR (neat) 2924, 2853, 1737, 1435, 1364, 1272, 1205, 758  $\text{cm}^{-1}$ ; HRMS (ESI)  $m/z$   $[\text{M}+\text{H}]^+$  calcd for  $\text{C}_{23}\text{H}_{24}\text{NO}_5$ : 394.1649, found 394.1650.

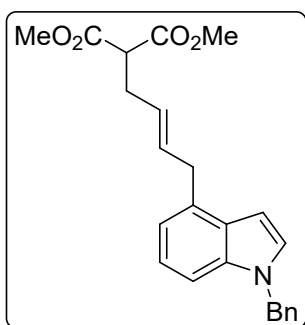

**Dimethyl (E)-2-(4-(1-benzyl-1H-indol-4-yl)but-2-en-1-**

**yl)malonate 5.** Analytical TLC on silica gel, 1:9 ethyl acetate/hexane  $R_f = 0.46$ ; yellow sticky liquid; yield 73% (28.5 mg,  $E/Z > 25:1$ );  $^1\text{H}$  NMR (400 MHz,  $\text{CDCl}_3$ )  $\delta$  7.30-7.24 (m, 3H), 7.15-7.07 (m, 5H), 6.88 (d,  $J = 6.4$  Hz, 1H), 6.55-6.54 (m, 1H), 5.85-5.78 (m, 1H), 5.58-5.50 (m, 1H), 5.30 (s, 2H), 3.67 (s, 6H), 3.61 (d,  $J = 6.8$  Hz, 2H), 3.44 (t,  $J = 7.6$  Hz, 1H), 2.62 (t,  $J = 6.8$  Hz, 2H);  $^{13}\text{C}$  NMR (125 MHz,  $\text{CDCl}_3$ )  $\delta$  169.5, 137.6, 136.4, 132.7, 132.4, 128.8, 128.1, 127.8, 127.7, 126.9, 126.5, 122.0, 119.0, 108.0, 100.2, 52.5, 52.0, 50.3, 36.6, 32.0; FT-IR (neat) 2961, 1732, 1493, 1435, 1259, 1152, 1017, 795  $\text{cm}^{-1}$ ; HRMS (ESI)  $m/z$   $[\text{M}+\text{H}]^+$  calcd for  $\text{C}_{24}\text{H}_{26}\text{NO}_4$ : 392.1856, found 392.1862.

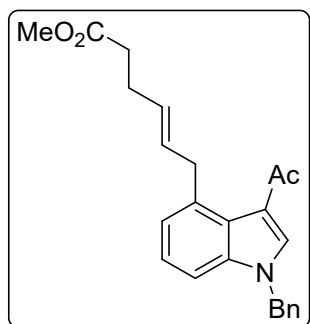

**Methyl (*E*)-6-(3-acetyl-1-benzyl-1*H*-indol-4-yl)hex-4-enoate 6.**

Analytical TLC on silica gel, 1:3 ethyl acetate/hexane  $R_f = 0.46$ ; yellow sticky liquid; yield 70% (26.2 mg,  $E/Z > 25:1$ );  $^1\text{H NMR}$  (400 MHz,  $\text{CDCl}_3$ )  $\delta$  7.77 (s, 1H), 7.36-7.30 (m, 3H), 7.21-7.17 (m, 1H), 7.15-7.13 (m, 3H), 7.08 (d,  $J = 7.2$  Hz, 1H), 5.74-5.67 (m, 1H), 5.46-5.39 (m, 1H), 5.33 (s, 2H), 4.07 (d,  $J = 6.8$  Hz, 2H), 3.61 (s, 3H), 2.52 (s, 3H), 2.37-2.27 (m, 4H);  $^{13}\text{C NMR}$  (125 MHz,  $\text{CDCl}_3$ )  $\delta$  192.2, 173.9, 138.3, 136.6, 135.8, 131.8, 129.1, 128.32, 128.30, 127.0, 124.6, 124.0, 123.8, 119.2, 108.2, 51.5, 50.8, 38.6, 34.3, 28.7, 28.1; FT-IR (neat) 2920, 1731, 1652, 1524, 1438, 1374, 1190, 970, 735  $\text{cm}^{-1}$ ; HRMS (ESI)  $m/z$   $[\text{M}+\text{H}]^+$  calcd for  $\text{C}_{24}\text{H}_{26}\text{NO}_3$ : 376.1907, found 376.1914.

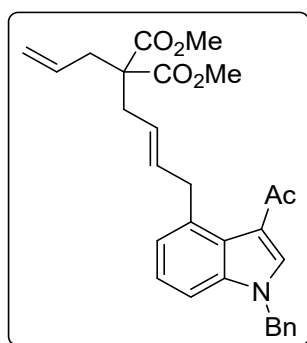

**Dimethyl (*E*)-2-(4-(3-acetyl-1-benzyl-1*H*-indol-4-yl)but-2-en-1-yl)-2-allylmalonate 7.**

Analytical TLC on silica gel, 1:3 ethyl acetate/hexane  $R_f = 0.47$ ; colorless sticky liquid; yield 66% (31.2 mg,  $E/Z > 25:1$ );  $^1\text{H NMR}$  (400 MHz,  $\text{CDCl}_3$ )  $\delta$  7.79 (s, 1H), 7.34-7.30 (m, 3H), 7.20-7.16 (m, 1H), 7.13-7.11 (m, 3H), 7.05 (d,  $J = 6.8$  Hz, 1H), 5.76-5.69 (m, 1H), 5.64-5.55 (m, 1H), 5.34 (s, 2H), 5.25-5.17 (m, 1H), 5.03-4.97 (m, 2H), 4.09 (d,  $J = 6.4$  Hz, 2H), 3.59 (s, 6H), 2.57-2.55 (m, 4H), 2.53 (s, 3H);  $^{13}\text{C NMR}$  (125 MHz,  $\text{CDCl}_3$ )  $\delta$  192.1, 171.4, 138.33, 138.30, 136.8, 136.2, 135.9, 135.8, 132.7, 129.1, 128.3, 126.9, 124.6, 124.0, 123.4, 119.2, 119.0, 108.2, 58.1, 52.3, 50.8, 38.8, 36.9, 35.9, 28.7; FT-IR (neat) 2924, 1732, 1656, 1525, 1440, 1376, 1207, 748  $\text{cm}^{-1}$ ; HRMS (ESI)  $m/z$   $[\text{M}+\text{H}]^+$  calcd for  $\text{C}_{29}\text{H}_{32}\text{NO}_5$ : 474.2275, found 474.2283.

## Mechanistic Investigation

**Radical Trapping Experiments.** In an oven-dried pressure tube, a mixture of indole **1a** (0.1 mmol, 24.9 mg), dimethyl 2-vinylcyclopropane-1,1-dicarboxylate **2a** (0.2 mmol, 36.8 mg), [Ru(*p*-cymene)Cl<sub>2</sub>]<sub>2</sub> (5 mol %, 0.005 mmol, 3 mg), K<sub>2</sub>CO<sub>3</sub> (0.2 mmol, 28 mg), MesCO<sub>2</sub>H (0.03 mmol, 5 mg) and TEMPO (0.1 mmol, 15.6 mg) or BHT (0.1 mmol, 22 mg) were stirred in HFIP (1 mL) at 90 °C in a preheated oil bath for 12 h under argon atmosphere. Upon completion, the reaction mixture was allowed to cool to room temperature and was diluted with EtOAc and passed through a celite pad. The purification was performed as described in the general procedure to afford **3a**.

**H/D Exchange Experiment of 1a with D<sub>2</sub>O in Presence of 2a.** In an oven-dried pressure tube, a mixture of indole **1a** (0.1 mmol, 24.9 mg), dimethyl 2-vinylcyclopropane-1,1-dicarboxylate **2a** (0.2 mmol, 36.8 mg), [Ru(*p*-cymene)Cl<sub>2</sub>]<sub>2</sub> (5 mol %, 0.005 mmol, 3 mg), K<sub>2</sub>CO<sub>3</sub> (0.2 mmol, 28 mg), MesCO<sub>2</sub>H (0.03 mmol, 5 mg), D<sub>2</sub>O (1 mmol, 0.2 mL) and HFIP (1 mL) were stirred at 90 °C in a preheated oil bath for 12 h under argon atmosphere. Upon completion, the reaction mixture was allowed to cool to room temperature and was diluted with EtOAc and passed through a celite pad. The purification was performed as described in the general procedure to afford [D<sub>n</sub>]-**1a** and [D<sub>n</sub>]-**3a**. The deuterium incorporation was observed as 15% at C4-H, 5% at C2-H of **1a** based on 500 MHz <sup>1</sup>H NMR spectrum.

**H/D Exchange Experiment of 1a with D<sub>2</sub>O in Absence of 2a.** In an oven-dried pressure tube, a mixture of indole **1a** (0.1 mmol, 24.9 mg), [Ru(*p*-cymene)Cl<sub>2</sub>]<sub>2</sub> (5 mol %, 0.005 mmol, 3 mg), K<sub>2</sub>CO<sub>3</sub> (0.2 mmol, 28 mg), MesCO<sub>2</sub>H (0.03 mmol, 5 mg), D<sub>2</sub>O (1 mmol, 0.2 mL) and HFIP (1 mL) were stirred at 90 °C in a preheated oil bath for 12 h under argon atmosphere. Upon completion, the reaction mixture was allowed to cool to room temperature and was diluted with EtOAc and passed through celite pad. The purification was performed as described in the general procedure to give [D<sub>n</sub>]-**1a**. The deuterium incorporation was observed as 26% at C4-H and 11% at C2-H based on 500 MHz <sup>1</sup>H NMR spectrum.

**Preparation of 1-(1-Benzyl-1*H*-indol-3-yl-2,4-*d*<sub>2</sub>)ethan-1-one [D<sub>2</sub>]-**1a**.** In an oven-dried pressure tube, 1-(1-benzyl-1*H*-indol-3-yl)ethan-1-one **1a** (0.1 mmol, 24.9 mg), [Cp\**Rh*Cl<sub>2</sub>]<sub>2</sub> (2.5 mol %, 0.0025 mmol, 1.5 mg), AgSbF<sub>6</sub> (0.02 mmol, 6.8 mg), Cu(OAc)<sub>2</sub> (0.1 mmol, 18 mg), D<sub>2</sub>O (0.4 mmol, 80 μL) and 1,4-dioxane (1.5 mL) were stirred at 120 °C in a preheated oil bath for 14 h. The resulting reaction mixture was allowed to cool to room temperature, diluted with CH<sub>2</sub>Cl<sub>2</sub> (10 mL) and passed through a short pad of celite. Drying over Na<sub>2</sub>SO<sub>4</sub> and

evaporation of the solvent gave a residue that was purified on silica gel column chromatography using *n*-hexane and ethyl acetate as an eluent to afford [D<sub>2</sub>]-**1a** as a light-yellow solid. The deuterium incorporation was determined using 600 MHz <sup>1</sup>H NMR as 85% at C4-H.

**Kinetic Isotope Effect Experiment.** A mixture of 1-(1-benzyl-1*H*-indol-3-yl)ethan-1-one **1a** (0.05 mmol, 12.4 mg) and 1-(1-Benzyl-1*H*-indol-3-yl-2,4-*d*<sub>2</sub>)ethan-1-one [D<sub>2</sub>]-**1a** (0.05 mmol, 12.5 mg) was stirred with dimethyl 2-vinylcyclopropane-1,1-dicarboxylate **2a** (0.2 mmol, 36.8 mg) for 0.5 h under standard reaction condition. The reaction mixture was allowed to cool to room temperature and was diluted with EtOAc and passed through celite pad. The purification was performed as described in the general procedure to afford [D<sub>1</sub>]-**3a** and a mixture of unreacted **1a** and [D<sub>2</sub>]-**1a** as a colorless solid. The intermolecular  $k_{\text{H}}/k_{\text{D}}$  was found to be 2.18, based on 400 MHz <sup>1</sup>H NMR of the recovered substrate **1a** and [D<sub>2</sub>]-**1a**.

## References

1. (a) A. J. Borah and Z. Shi, *Chem. Commun.*, 2017, **53**, 3945; (b) L. Tu, W. Che, S. Li, X. Li, Y. Xie and Z. Li, *J. Mater. Chem. C*, 2021, **9**, 12124; (c) T. Paul, S. Basak and T. Punniyamurthy, *Org. Lett.*, 2022, **24**, 6000.
2. (a) M. R. Emmett and M. A. Kerr, *Org. Lett.*, 2011, **13**, 4180; (b) A. P. Dieskau, M. S. Holzwarth and B. Plietker, *J. Am. Chem. Soc.*, 2012, **134**, 5048; (c) J.-Q. Wu, Z.-P. Qiu, S.-S. Zhang, J.-G. Liu, Y.-X. Lao, L.-Q. Gu, Z. -S. Huang, J. Li and H. Wang, *Chem. Commun.*, 2015, **51**, 77; (d) M. M. Littleson, C. M. Baker, A. J. Dalençon, E. C. Frye, C. Jamieson, A. R. Kennedy, K. B. Ling, M. M. McLachlan, M. G. Montgomery, C. J. Russell and A. J. B. Watson, *Nat. Commun.*, 2018, **9**, 1105; (e) D.-F. Chen, S. Bernsten and G. M. Miyake, *Macromolecules*, 2020, **53**, 8352.
3. S. I. Ali, M. D. Nikalje and A. Sudalai, *Org. Lett.*, 1999, **1**, 705.
4. A. P. Krapcho, J. F. Weimaster, J. M. Eldridge, E. G. E. Jahngen, Jr., A. J. Lovey and W. P. J. Stephens, *Org. Chem.*, 1978, **43**, 138.
5. Q. Wang, C. L. Zhi, P. P. Lu, S. Liu, X. Zhu, X. Q. Hao and M. P. Song, *Adv. Synth. Catal.*, 2019, **361**, 1253.

SBT-AC-DG-1H

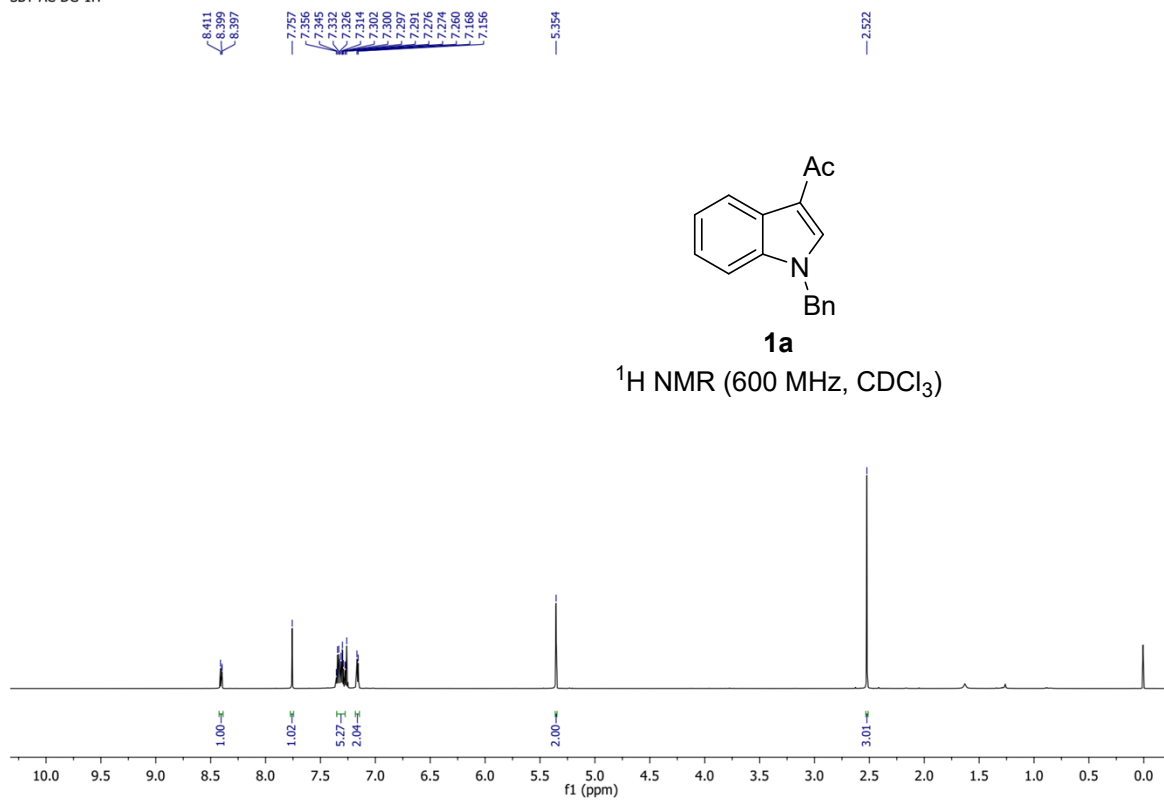

SBT-2Me-DG-1H

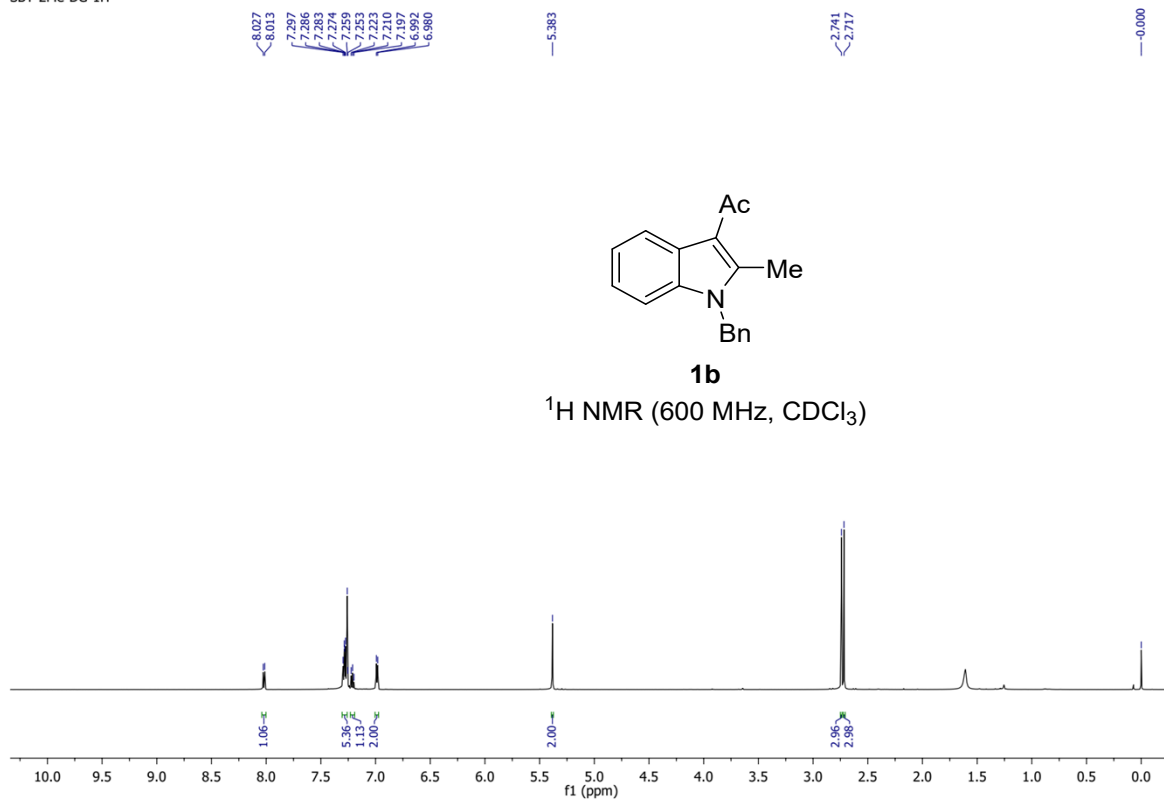

SBT-5Br-DG-1H

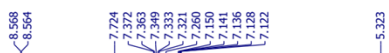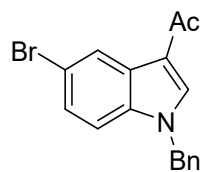

**1c**

<sup>1</sup>H NMR (400 MHz, CDCl<sub>3</sub>)

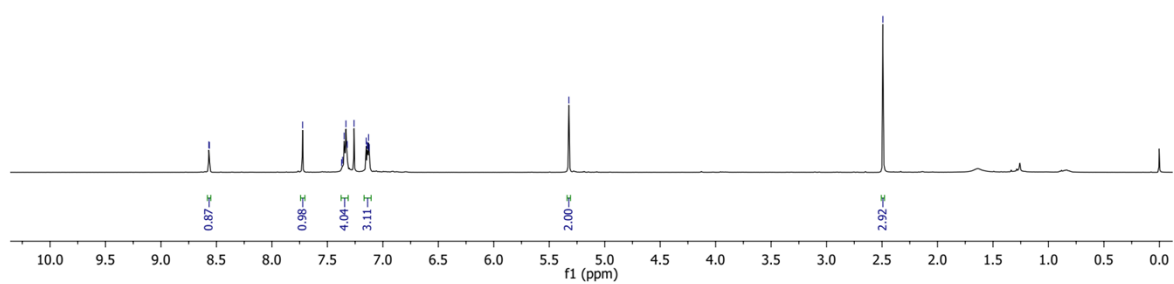

SBT-5Me-DG-1H

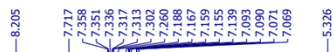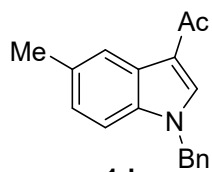

**1d**

<sup>1</sup>H NMR (400 MHz, CDCl<sub>3</sub>)

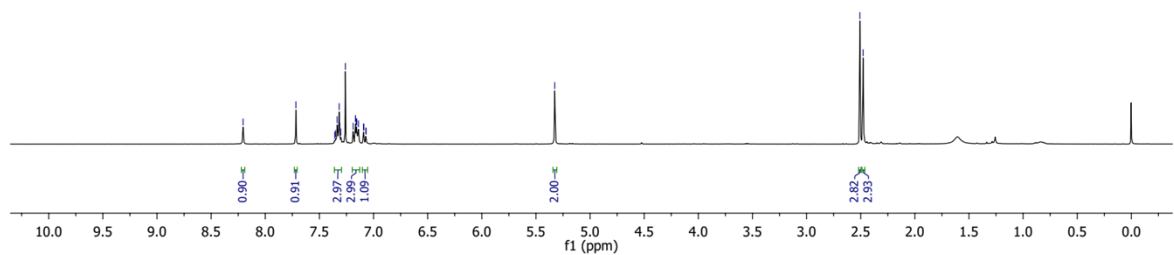



SBT-5F-DG-1H

8.096  
8.090  
8.072  
8.065  
7.764  
7.371  
7.363  
7.349  
7.331  
7.318  
7.260  
7.199  
7.188  
7.176  
7.166  
7.155  
7.150  
7.135  
6.997  
6.990  
6.974  
6.968  
6.952  
6.946  
5.320

2.480

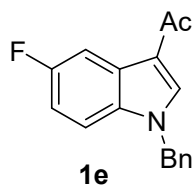

**1e**

<sup>1</sup>H NMR (400 MHz, CDCl<sub>3</sub>)

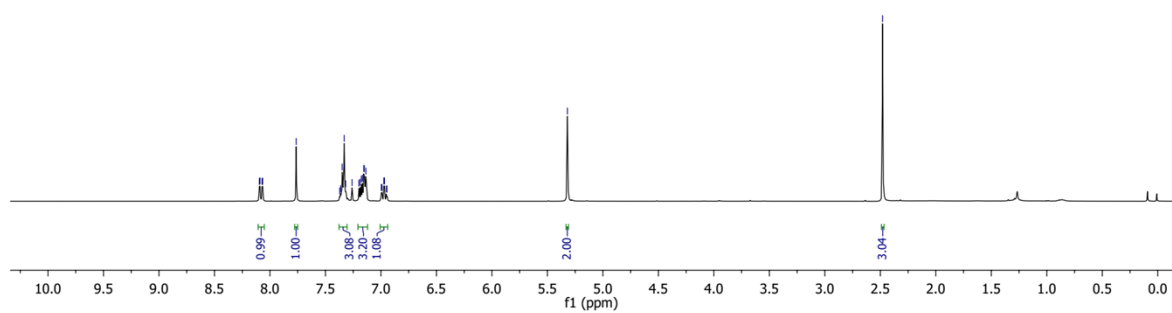

SBT-5OMe-DG-1H

7.917  
7.913  
7.700  
7.337  
7.326  
7.314  
7.298  
7.288  
7.291  
7.152  
7.137  
7.121  
6.889  
6.874  
6.874  
6.870

5.287

3.879

2.483

0.000

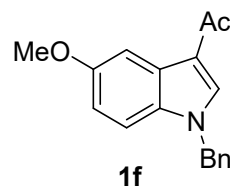

**1f**

<sup>1</sup>H NMR (600 MHz, CDCl<sub>3</sub>)

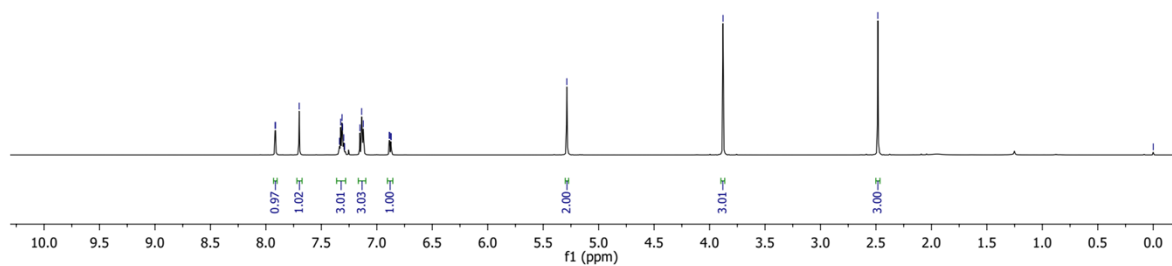

SBT-6Br-DG-1H

8.282  
7.698  
7.462  
7.405  
7.401  
7.383  
7.379  
7.368  
7.350  
7.266  
7.157  
7.152  
7.137

5.306

2.495

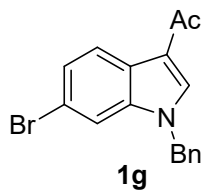

**1g**

<sup>1</sup>H NMR (400 MHz, CDCl<sub>3</sub>)

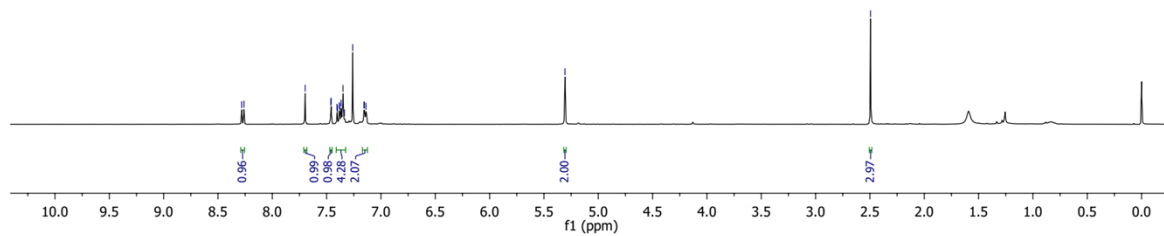

SBT-6Cl-DG-1H

8.322  
8.300  
7.699  
7.373  
7.370  
7.350  
7.334  
7.321  
7.271  
7.268  
7.233  
7.230  
7.227  
7.145  
7.140  
7.125

5.277

2.479

0.000

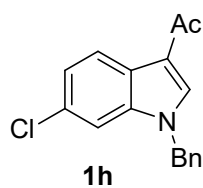

**1h**

<sup>1</sup>H NMR (400 MHz, CDCl<sub>3</sub>)

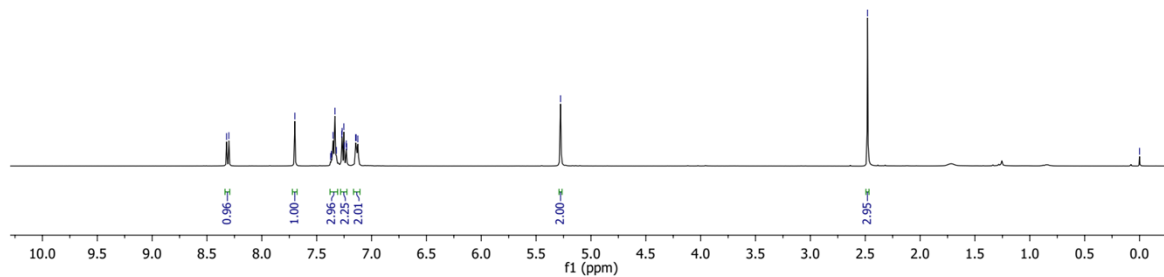

SBT-6F-DG-1H

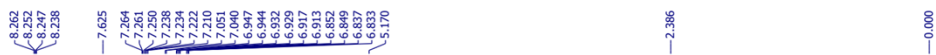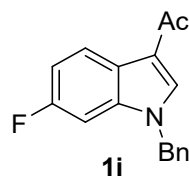

<sup>1</sup>H NMR (600 MHz, CDCl<sub>3</sub>)

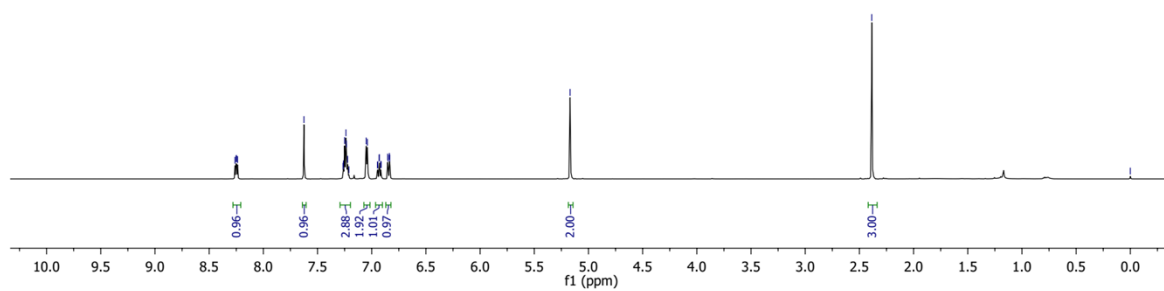

SBT-6PMP-1H

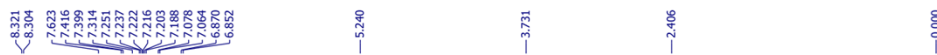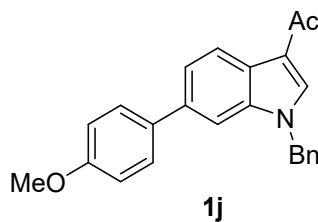

<sup>1</sup>H NMR (500 MHz, CDCl<sub>3</sub>)

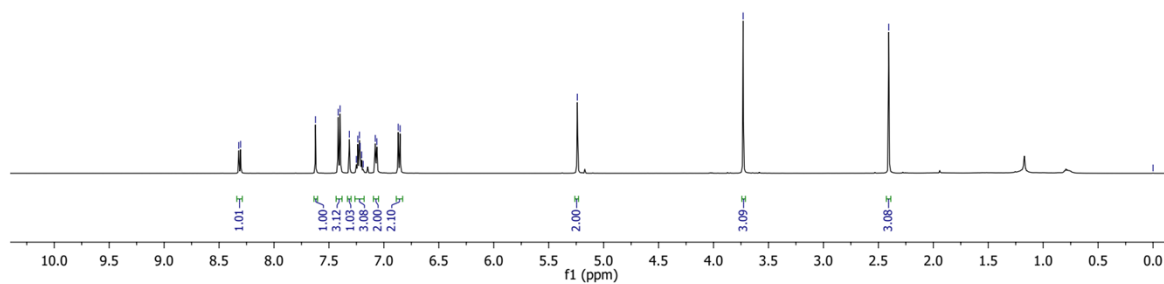

SBT-6NO2-DG-1H

8.516  
8.502  
8.292  
8.289  
8.188  
8.175  
8.170  
7.953  
7.407  
7.403  
7.392  
7.380  
7.377  
7.366  
7.260  
7.201  
7.199  
7.188  
5.440  
2.539

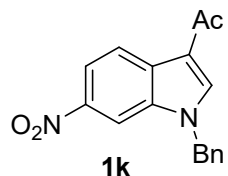

<sup>1</sup>H NMR (600 MHz, CDCl<sub>3</sub>)

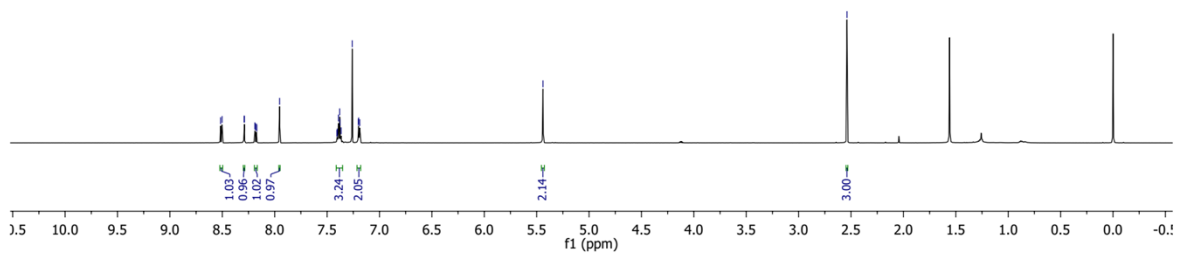

SBT-296-6NO2-DG-13C

192.675  
144.523  
138.811  
136.093  
131.209  
129.544  
128.986  
127.263  
123.239  
118.063  
117.367  
107.003  
77.372  
76.949  
51.314  
27.890

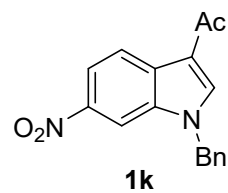

<sup>13</sup>C NMR (150 MHz, CDCl<sub>3</sub>)

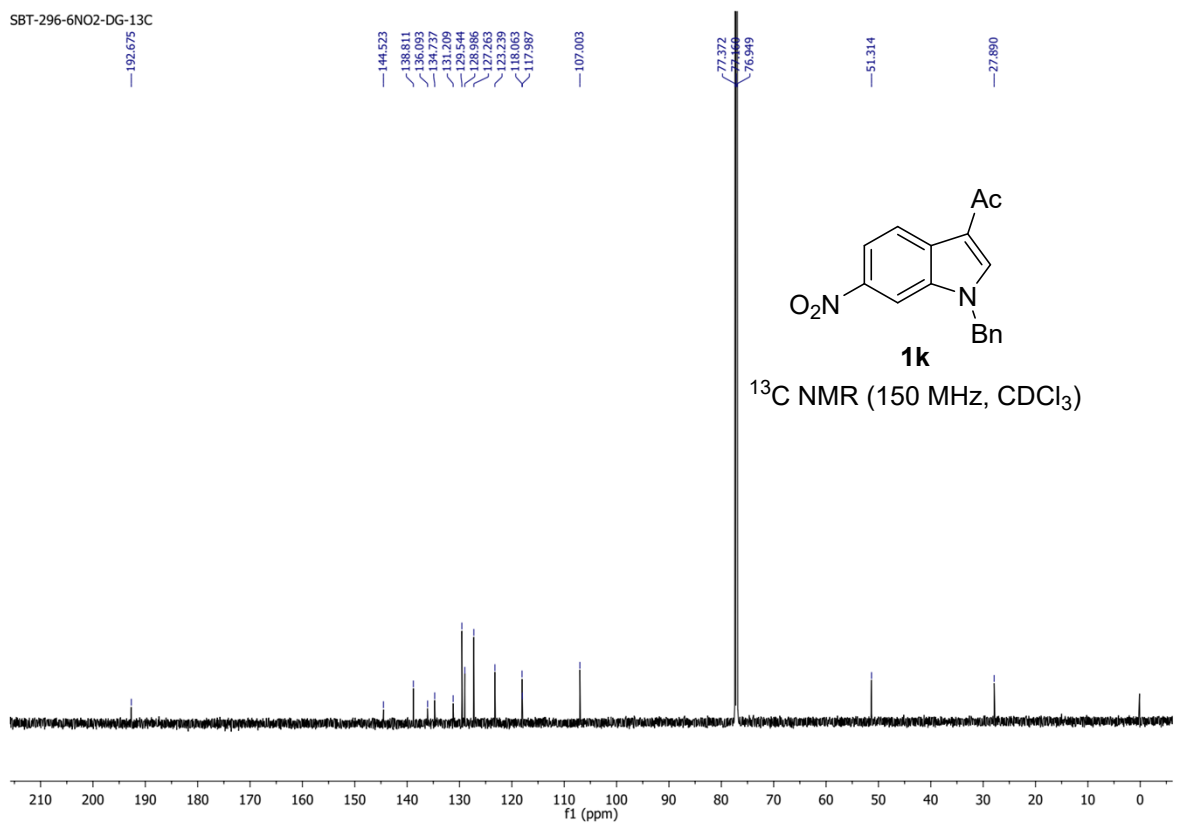

SBT-7Cl-DG-1H

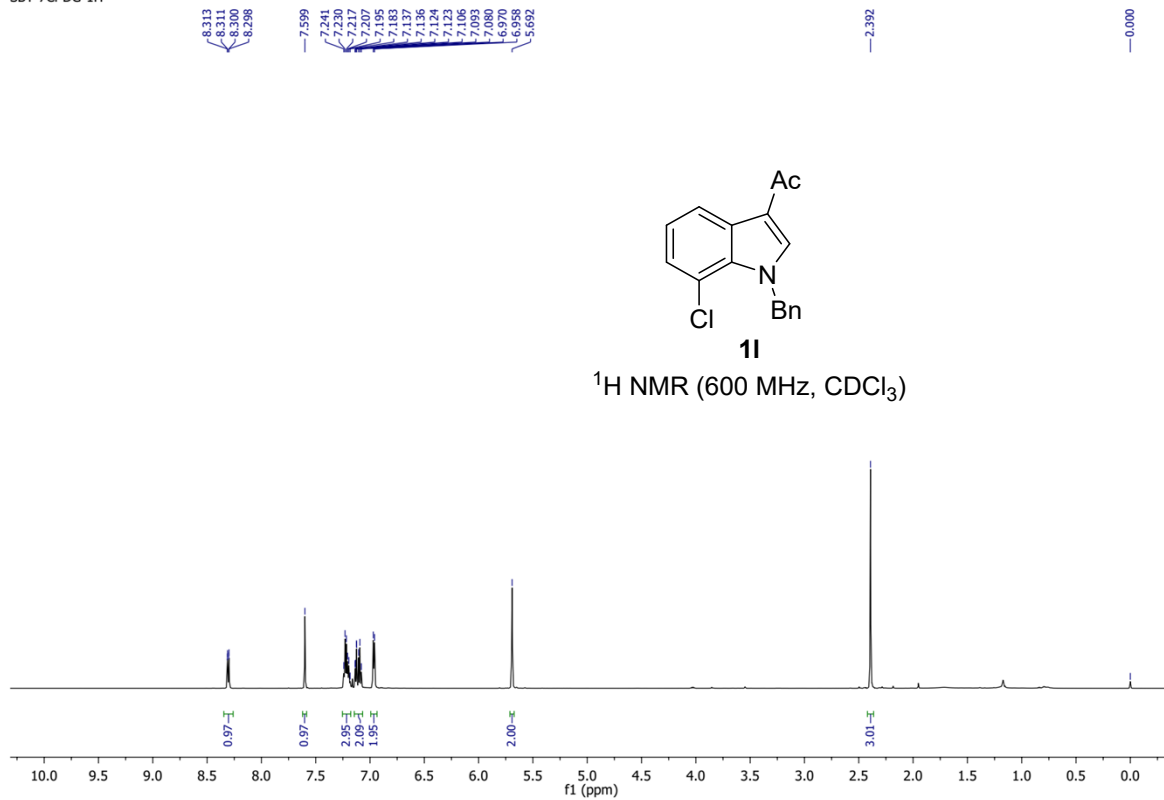

SBT-7OMe-DG-1H

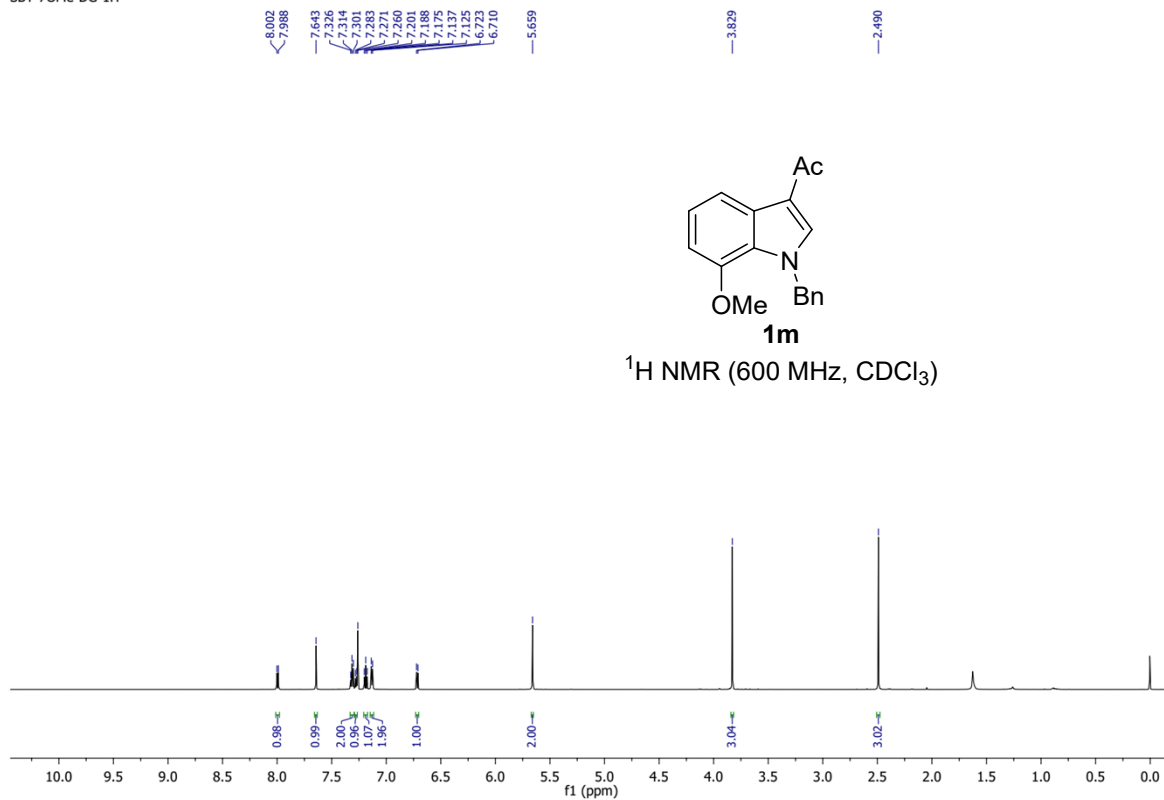

SBT-7Me-DG-1H

8.271  
8.251  
7.664  
7.259  
7.252  
7.225  
7.204  
7.181  
7.1124  
7.105  
7.085  
6.890  
6.870  
5.538  
2.438  
2.432  
-0.000

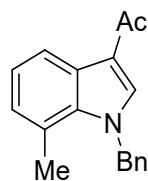

**1n**

<sup>1</sup>H NMR (400 MHz, CDCl<sub>3</sub>)

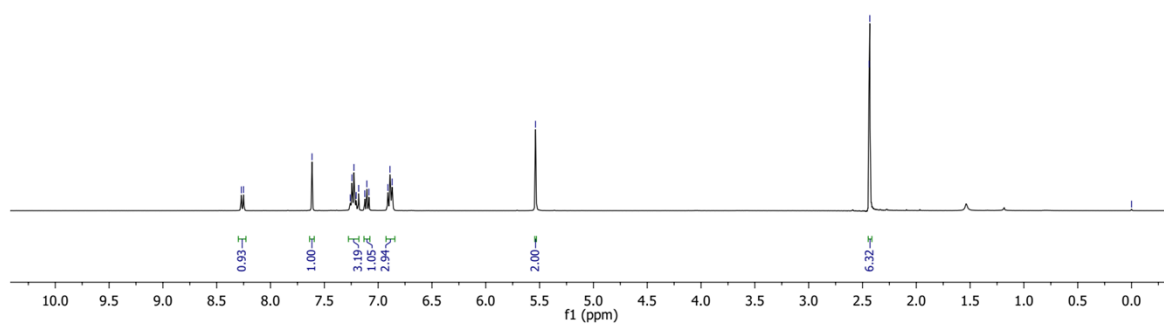

SBT-Penta[g]-DG-1H

8.173  
8.160  
7.545  
7.239  
7.227  
7.215  
7.206  
7.194  
7.183  
7.168  
7.144  
6.930  
6.918  
5.391  
2.988  
2.964  
2.895  
2.882  
2.870  
2.397  
2.020  
1.997  
1.985  
1.972  
1.960  
-0.000

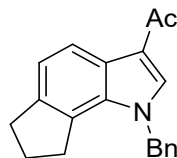

**1o**

<sup>1</sup>H NMR (600 MHz, CDCl<sub>3</sub>)

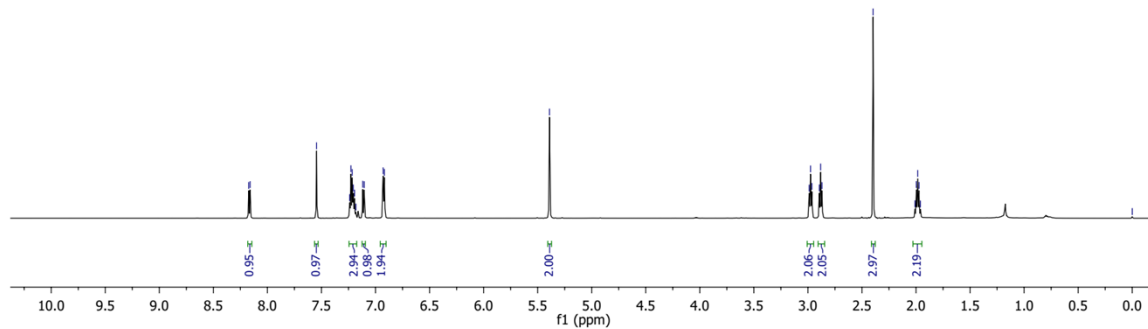

SBT-Benzo[g]-DG-1H

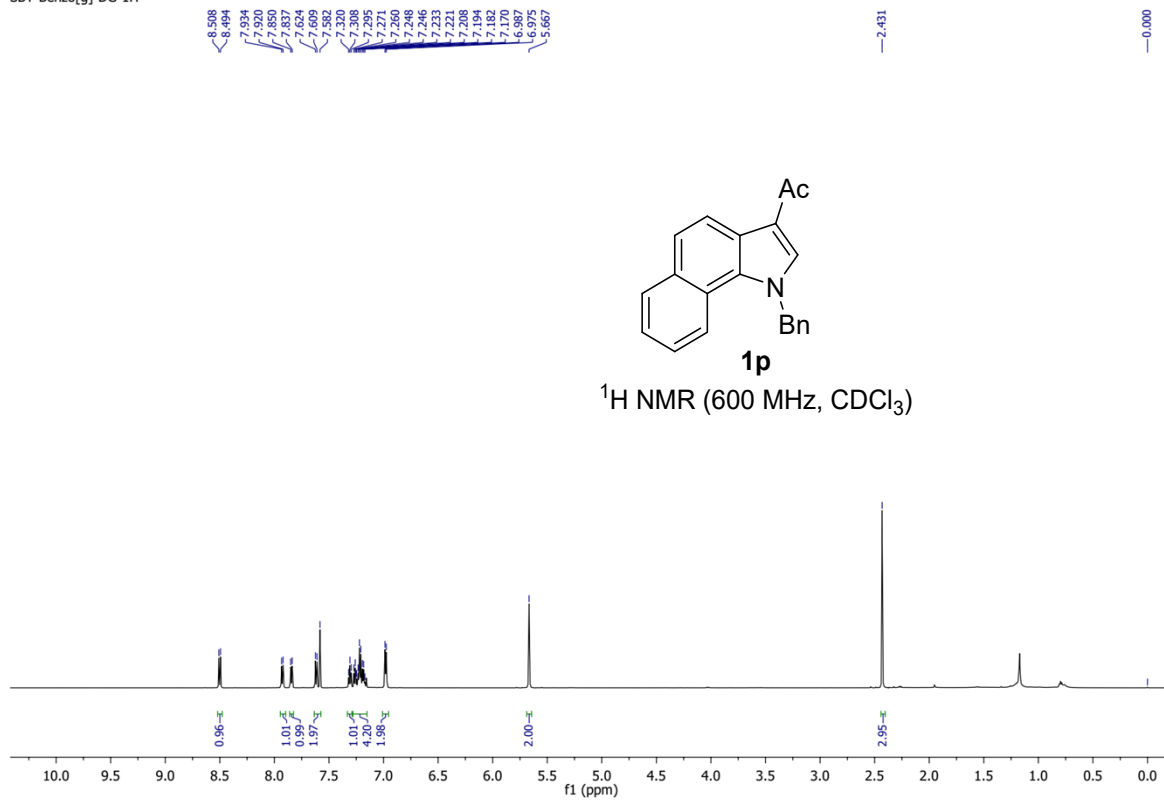

SBT-NH-AC-DG-1H

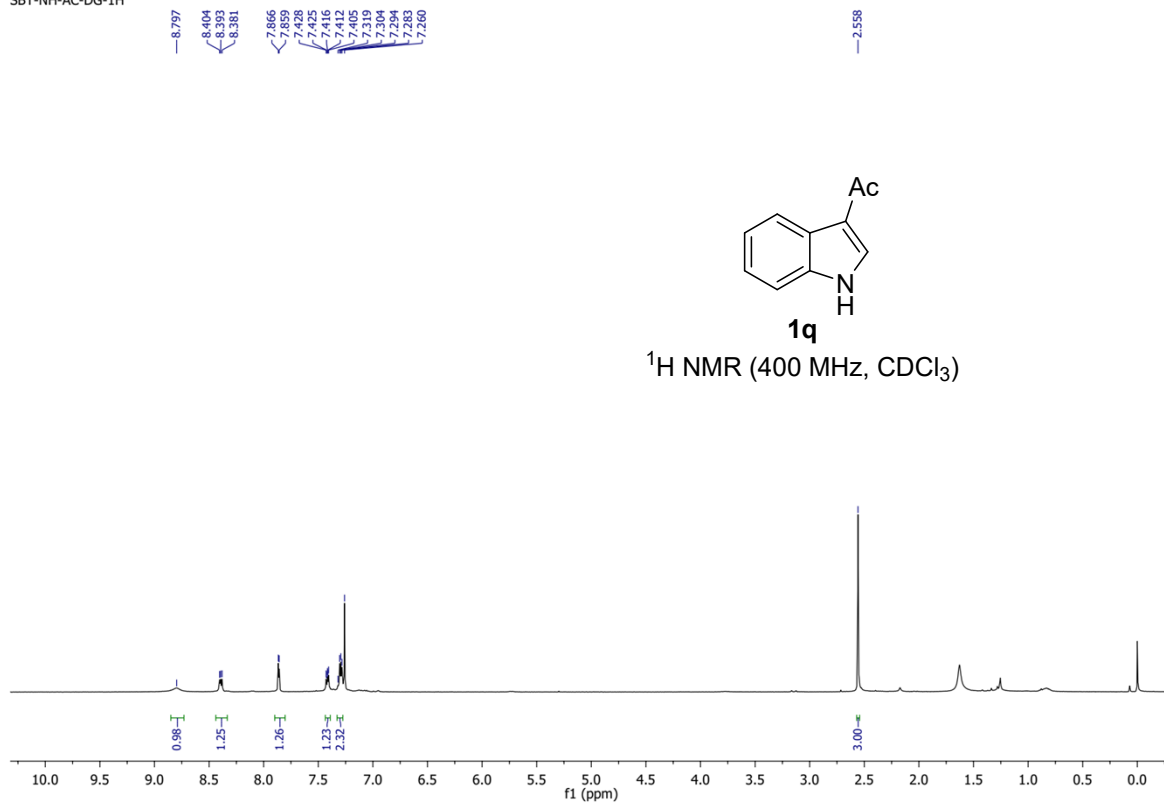

SBT-N-Oct-DG-1H

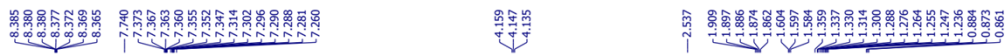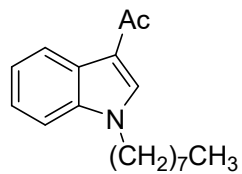

**1r**

<sup>1</sup>H NMR (600 MHz, CDCl<sub>3</sub>)

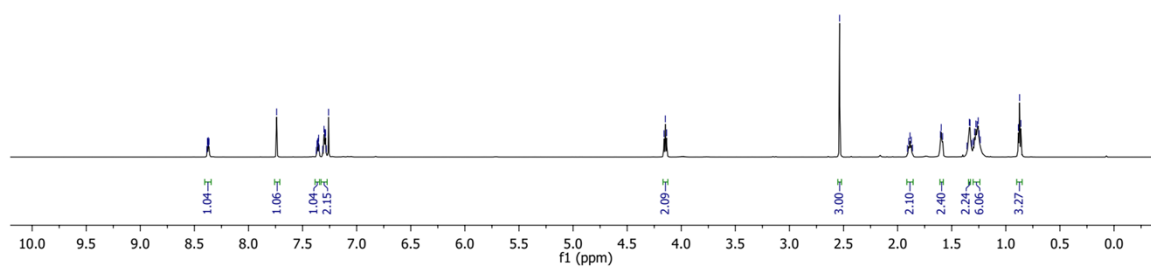

SBT-hexanoyl-DG-1H

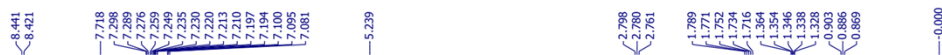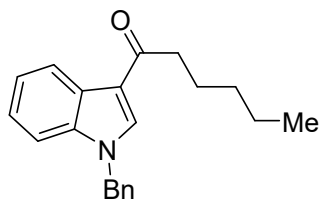

**1s**

<sup>1</sup>H NMR (400 MHz, CDCl<sub>3</sub>)

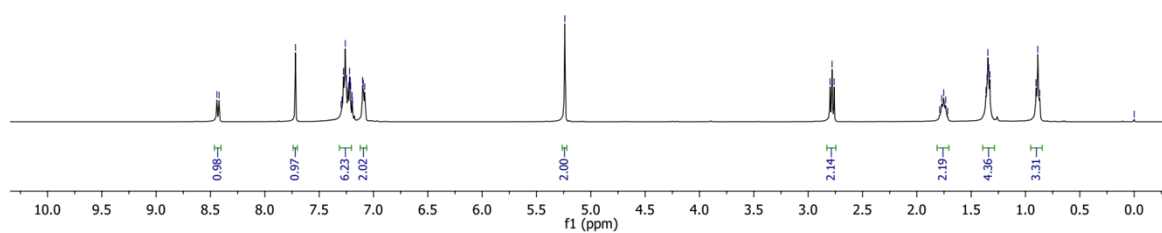



SBT-Sesa-DG-1H

8.408  
8.395  
7.761  
7.484  
7.482  
7.471  
7.468  
7.467  
7.367  
7.356  
7.344  
7.333  
7.321  
7.290  
7.189  
7.180  
7.059  
7.056  
7.043  
7.040  
6.879  
6.866  
6.855  
5.387

2.531

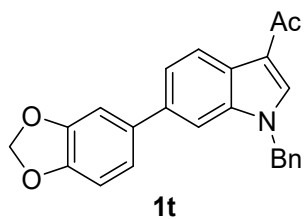

<sup>1</sup>H NMR (600 MHz, CDCl<sub>3</sub>)

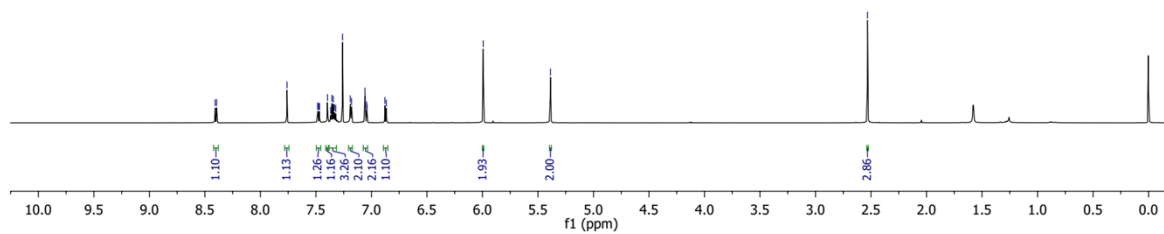

SBT-Gemfibrozil-DG-1H

8.468  
8.455  
7.796  
7.229  
7.219  
7.216  
7.206  
7.195  
7.192  
7.179  
7.167  
7.166  
7.157  
7.152  
7.142  
7.034  
7.023  
6.882  
6.879  
6.551  
6.538  
6.427  
5.248

3.772  
3.762  
3.752

2.162  
2.084  
1.959  
1.931  
1.926  
1.919  
1.912  
1.762  
1.695  
1.683  
1.675  
1.331

-0.000

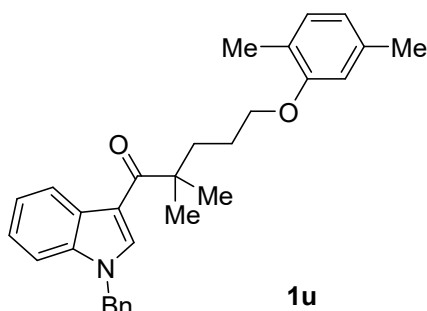

<sup>1</sup>H NMR (600 MHz, CDCl<sub>3</sub>)

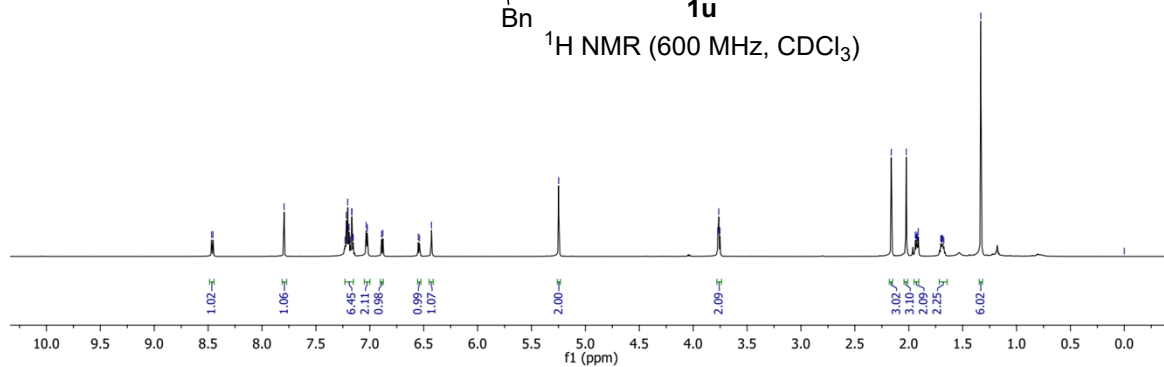

SBT-PIV-DG-1H

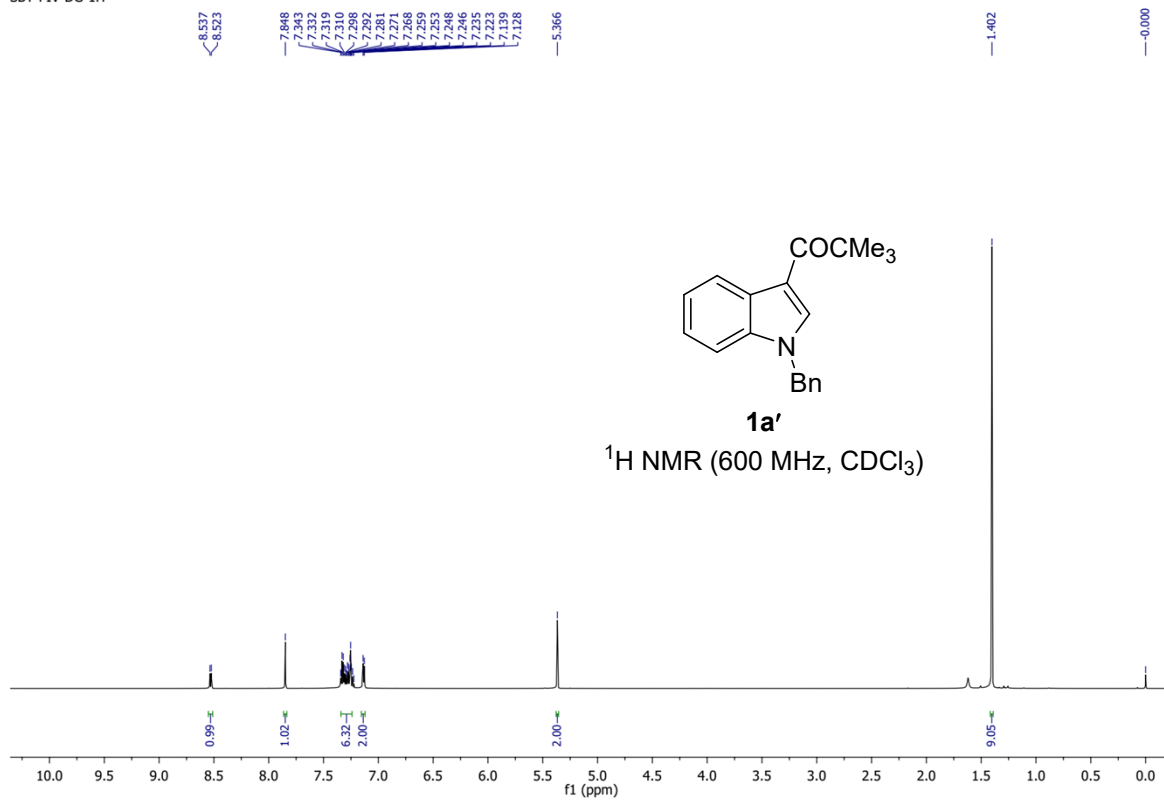

SBT-Formyl-DG-1H

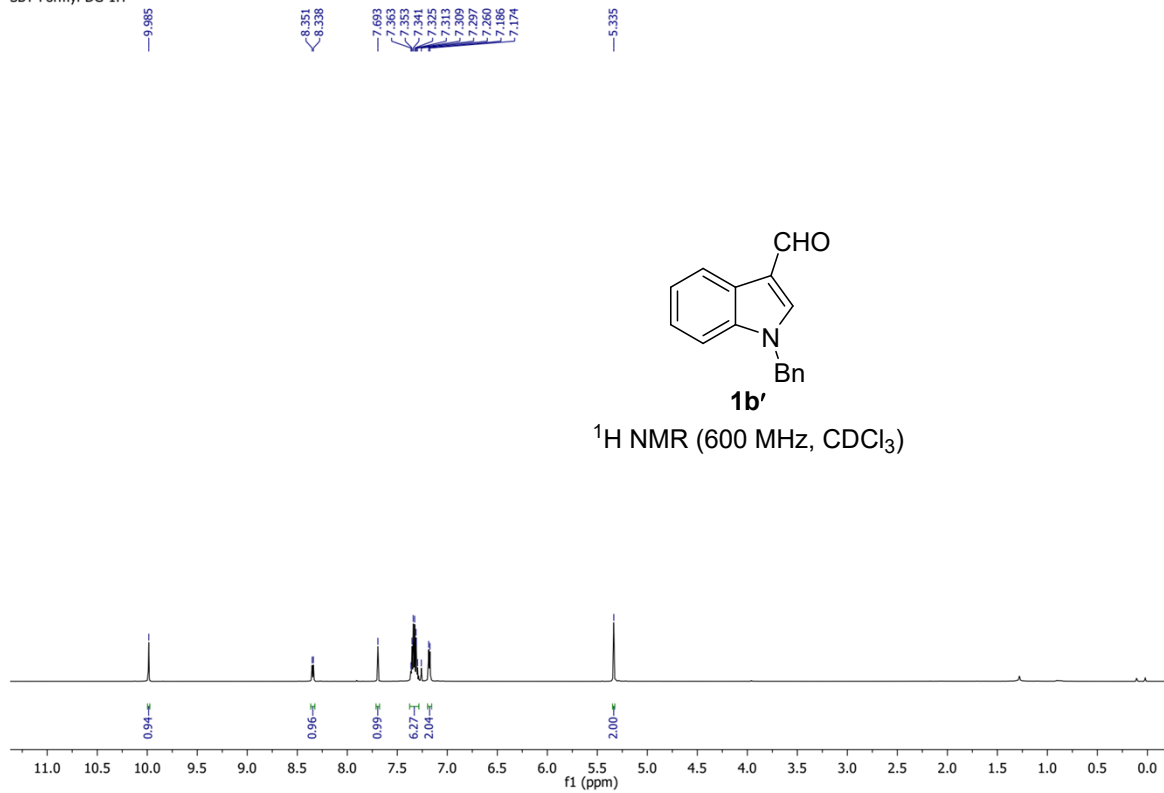

SBT-BZ-DG-1H

8.373  
8.360  
7.747  
7.736  
7.733  
7.730  
7.541  
7.467  
7.455  
7.443  
7.402  
7.377  
7.253  
7.237  
7.233  
7.224  
7.220  
7.200  
7.208  
7.205  
7.195  
7.057  
7.046

5.278

0.000

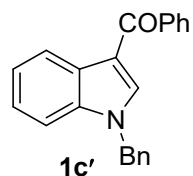

**1c'**

<sup>1</sup>H NMR (600 MHz, CDCl<sub>3</sub>)

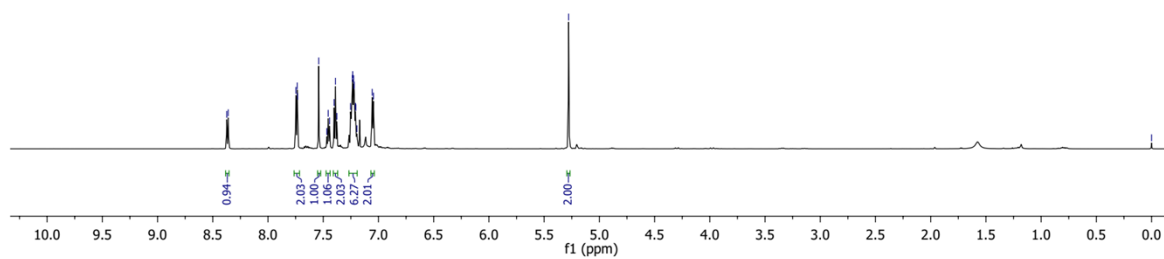

SBT-COCF3-DG-1H

8.438  
8.425

7.980

7.391

7.381

7.369

7.343

7.333

7.260

7.188

7.177

5.411

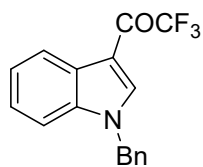

**1d'**

<sup>1</sup>H NMR (600 MHz, CDCl<sub>3</sub>)

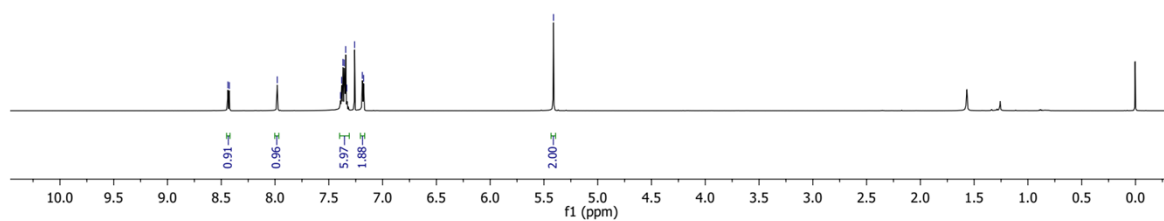

SBT-THIA-AC-DG-1H

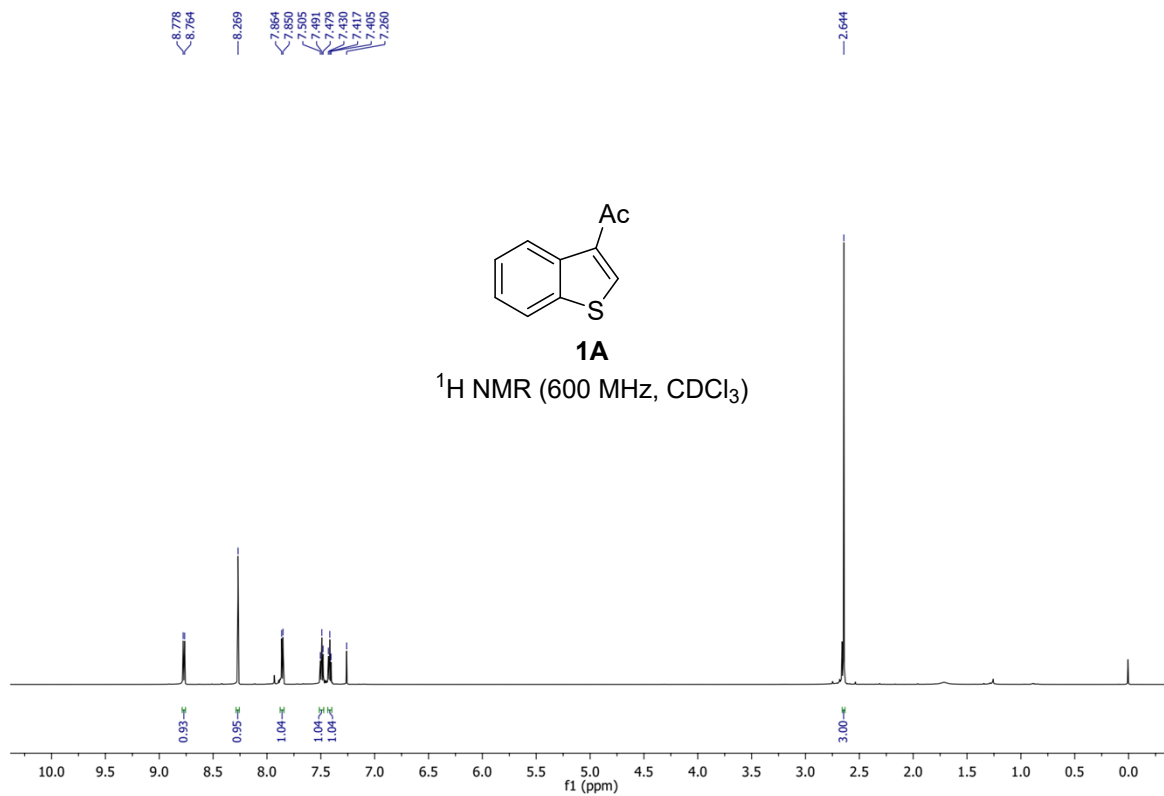

SBT-Indoline-AC-DG-1H

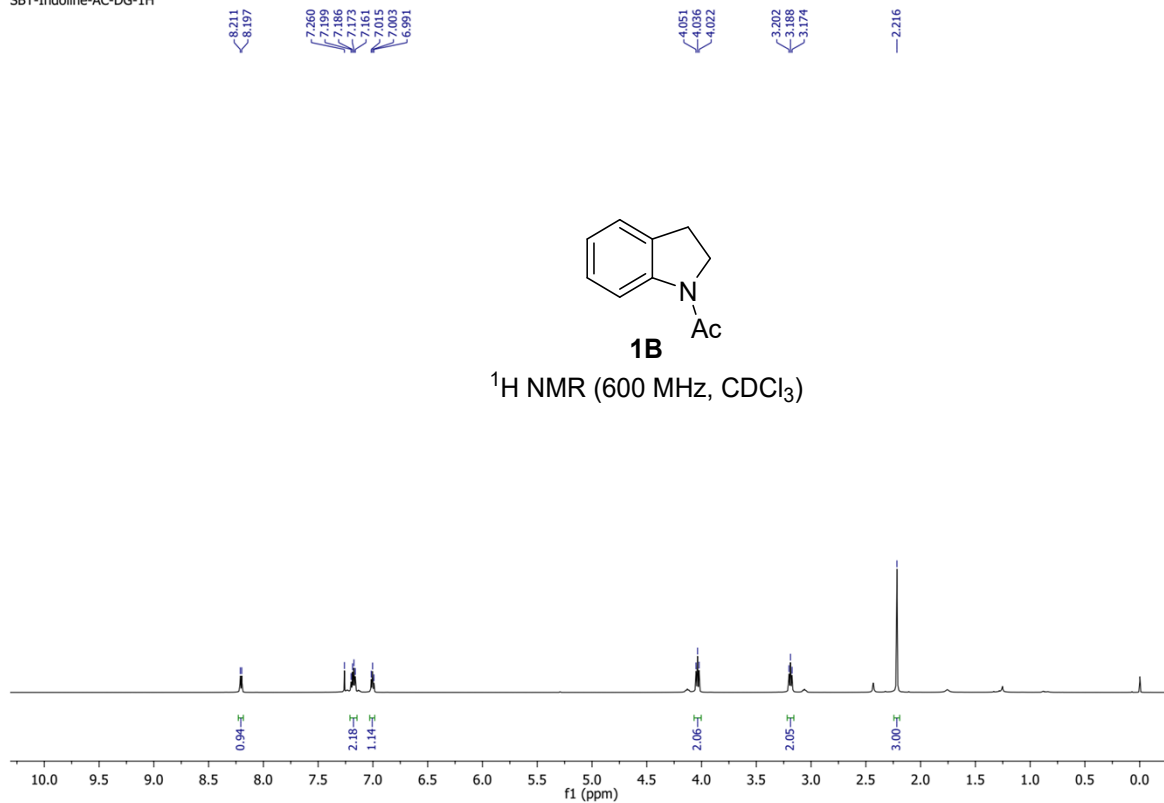

SBT-THQ-AC-DG-1H

7.260  
7.193  
7.188  
7.184  
7.142  
7.115  
7.103

3.796  
3.785  
3.774

2.724  
2.713  
2.702  
2.223  
1.975  
1.965  
1.954  
1.943  
1.932

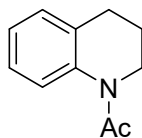

**1C**

<sup>1</sup>H NMR (600 MHz, CDCl<sub>3</sub>)

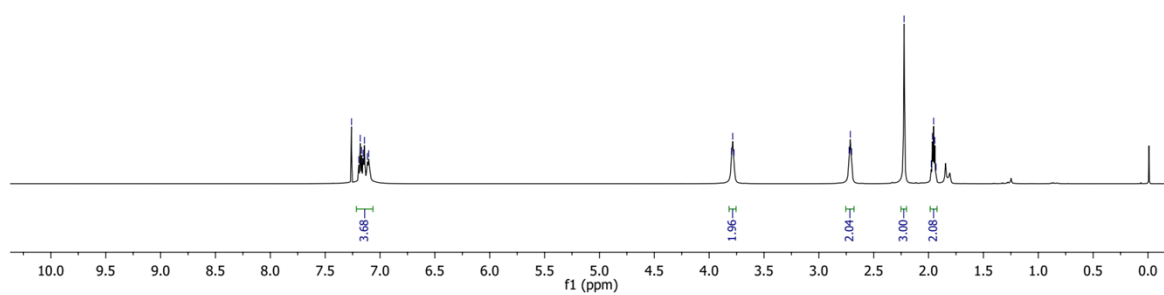

SBT-CARBA-AC-DG-1H

8.216  
8.206  
7.994  
7.981  
7.493  
7.479  
7.467  
7.401  
7.388  
7.376  
7.260

2.875

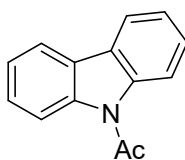

**1E**

<sup>1</sup>H NMR (600 MHz, CDCl<sub>3</sub>)

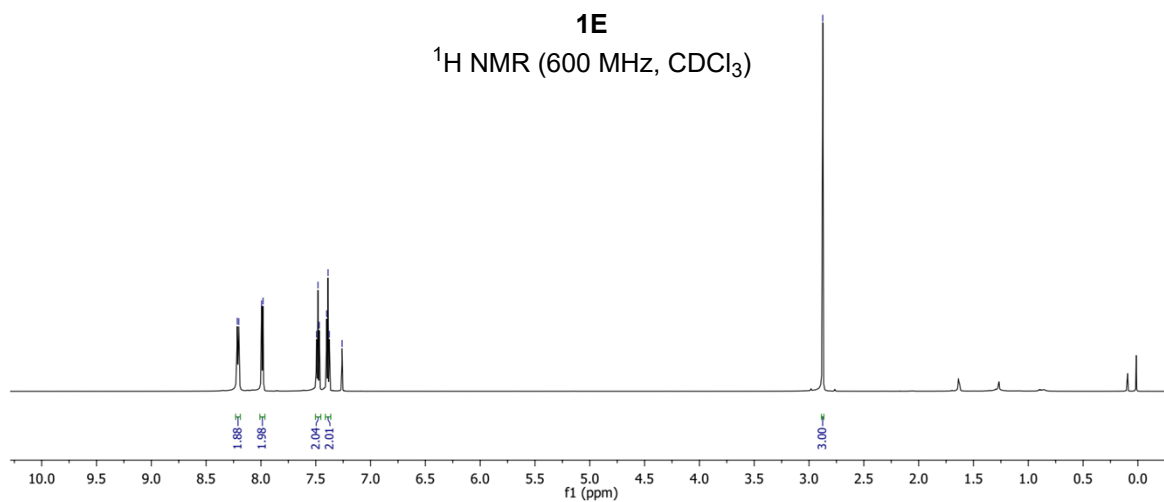

SBT-DI\_CO2Me-VCP-1H

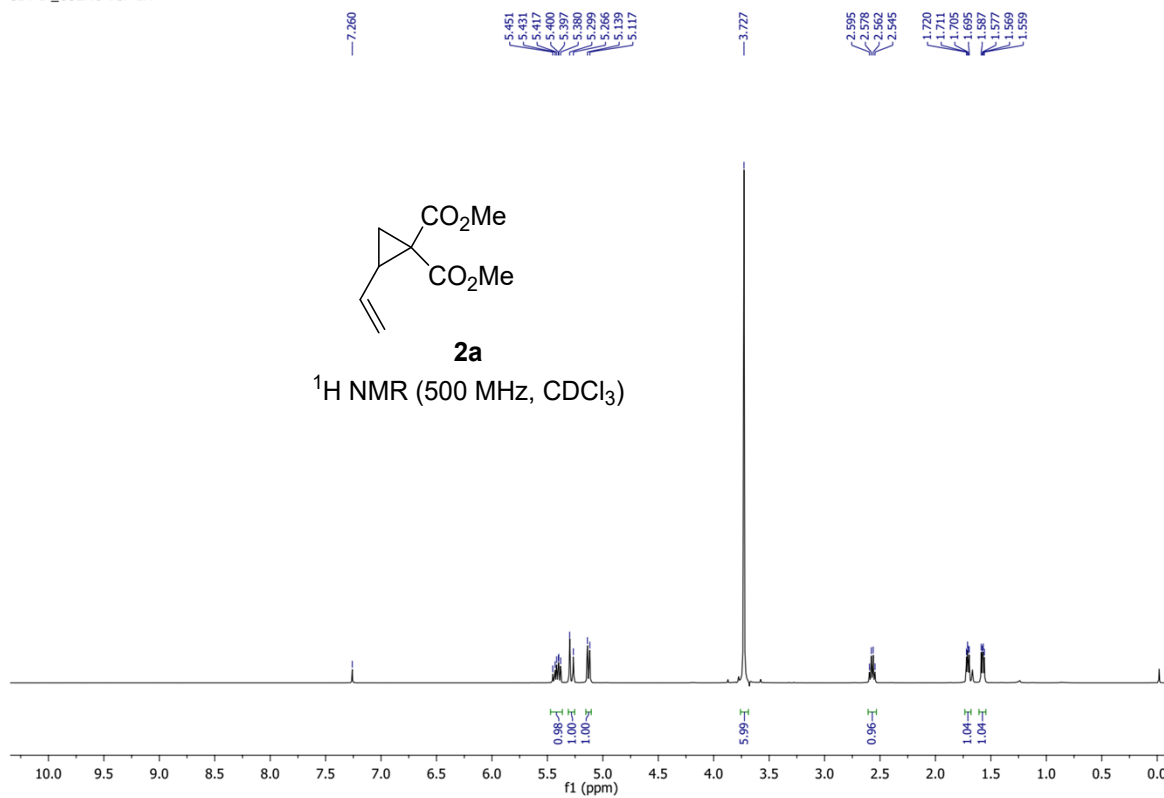

SBT-DI\_Benzyl-VCP-1H

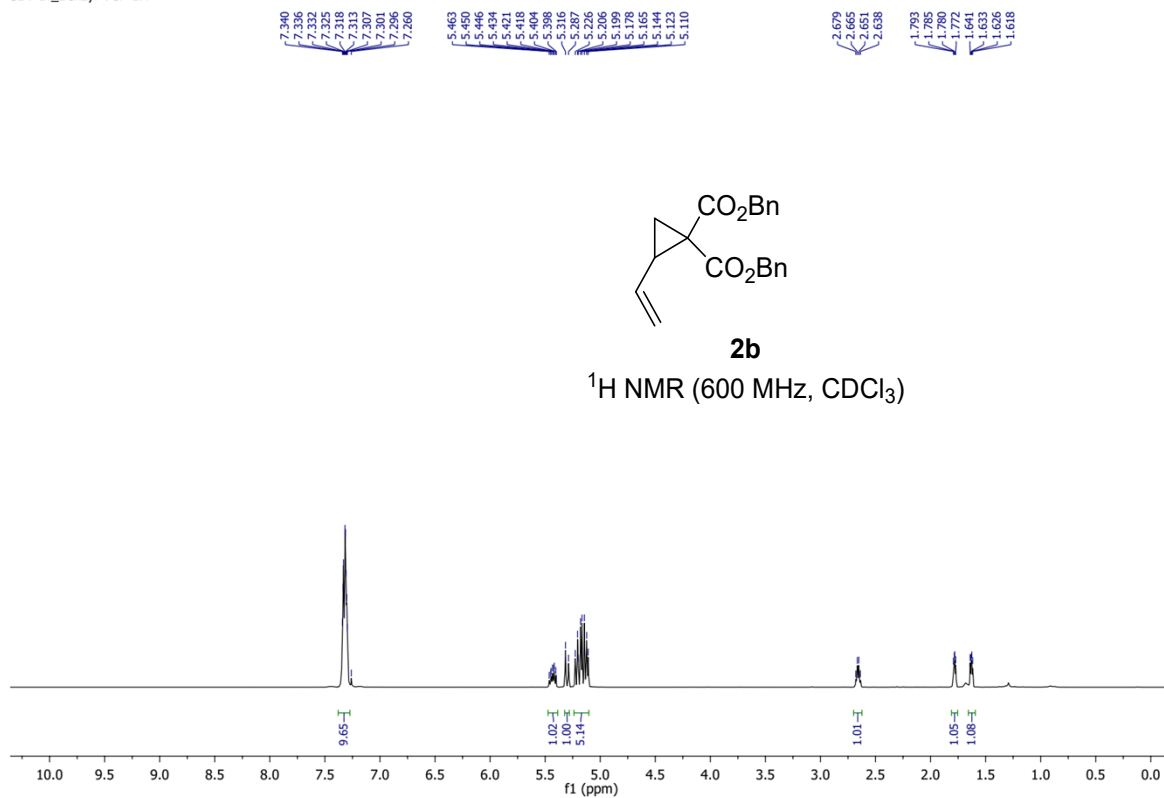

SBT-DL\_CO2Et-VCP-1H

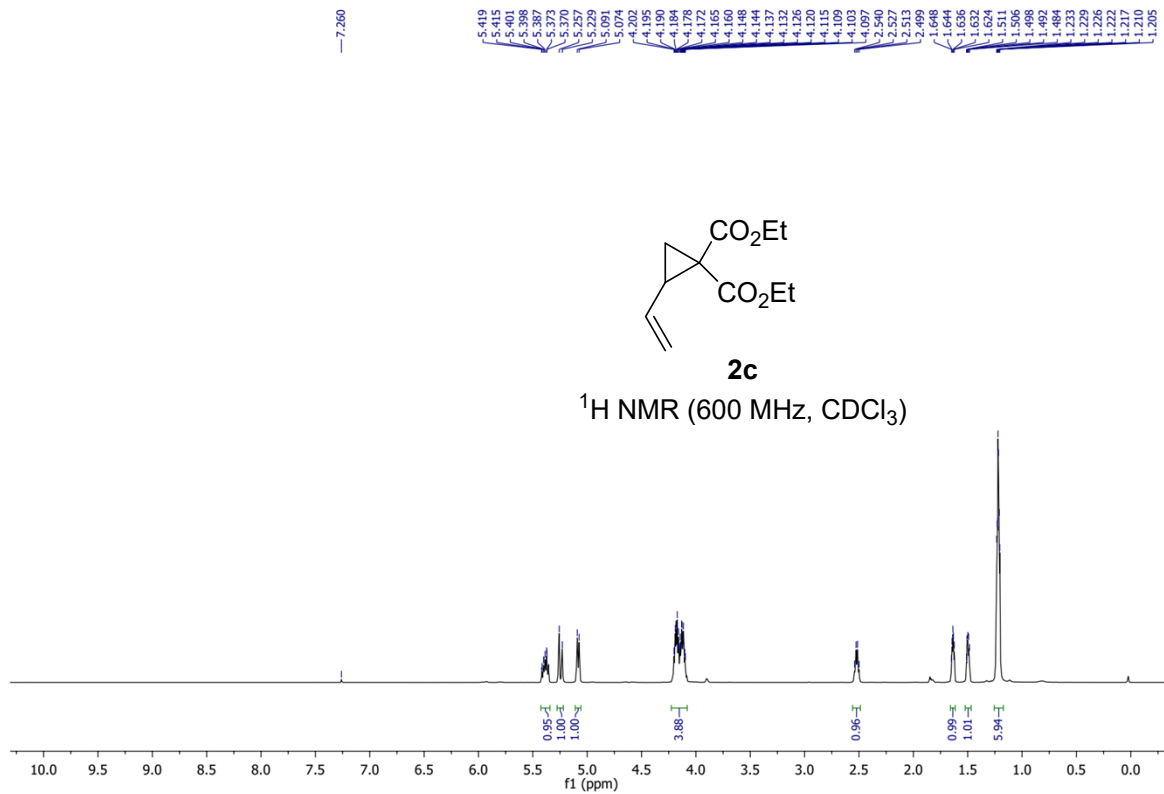

SBT-DL\_iPr-VCP

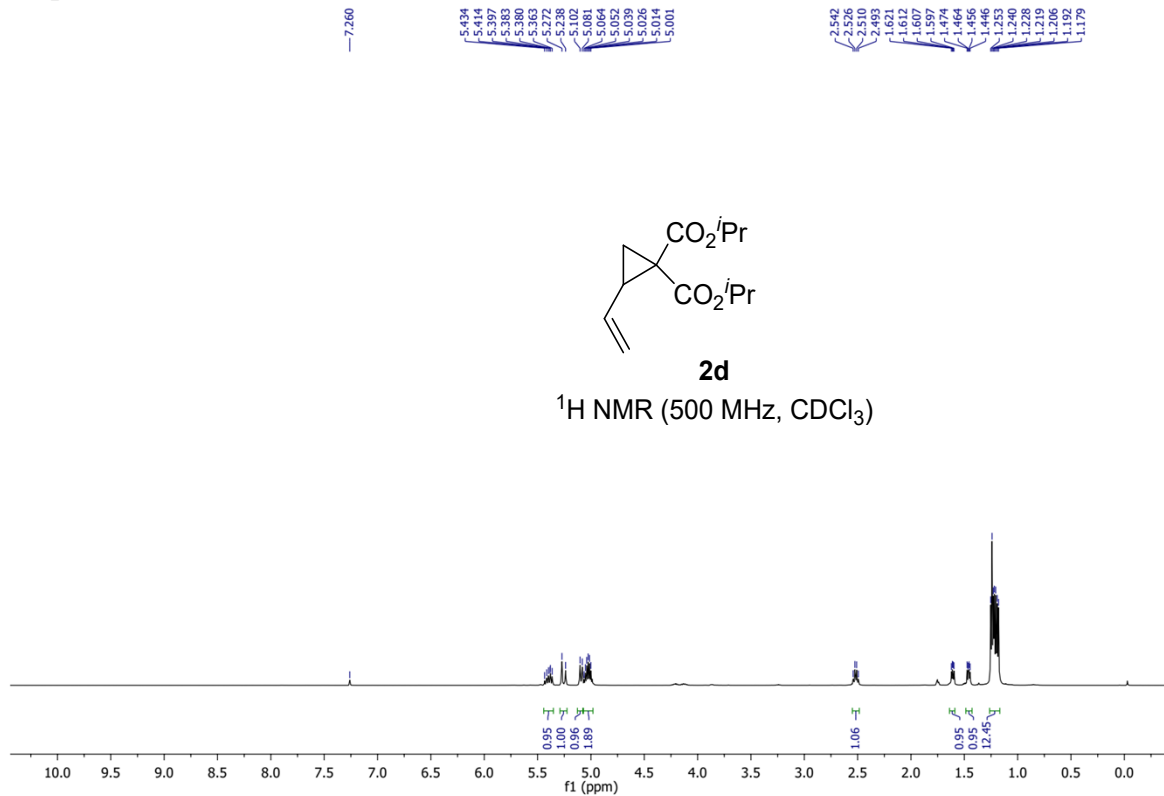

SBT-DI\_isoamyl-VCP-1H

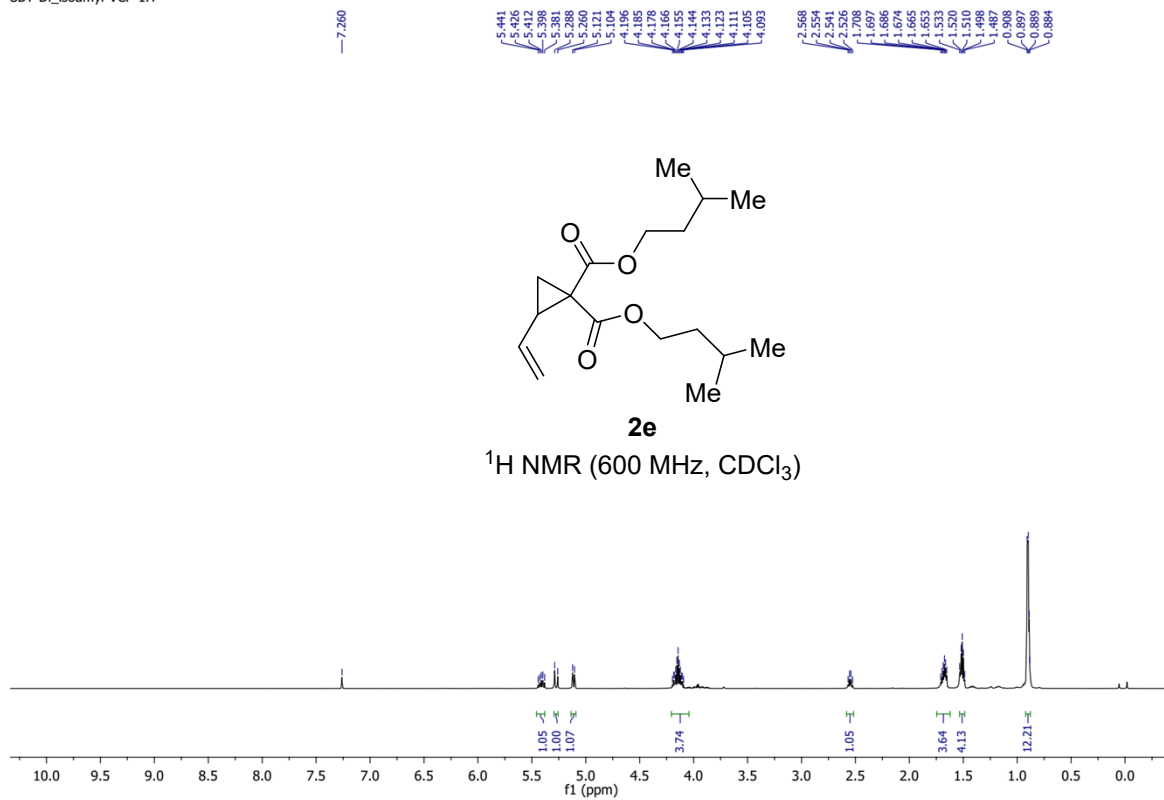

SBT-DI\_SO2Ph-VCP-1H

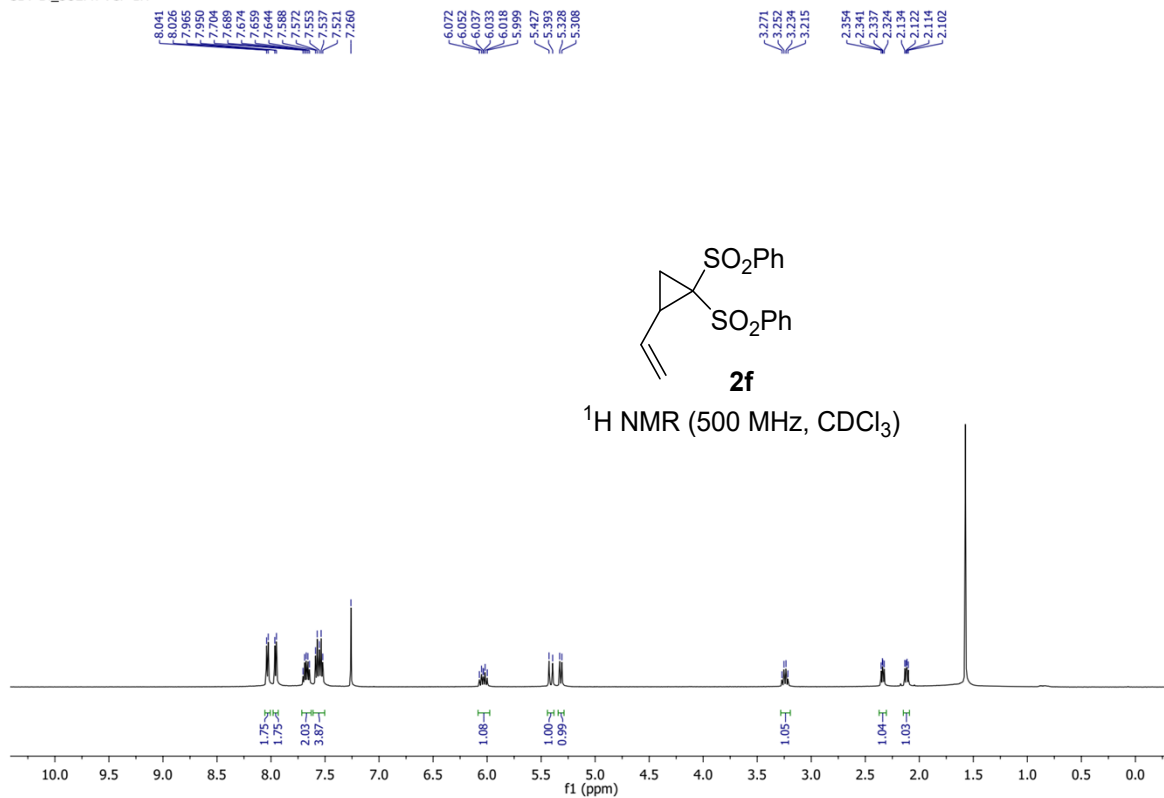



SBT-DI\_CN-VCP-1H

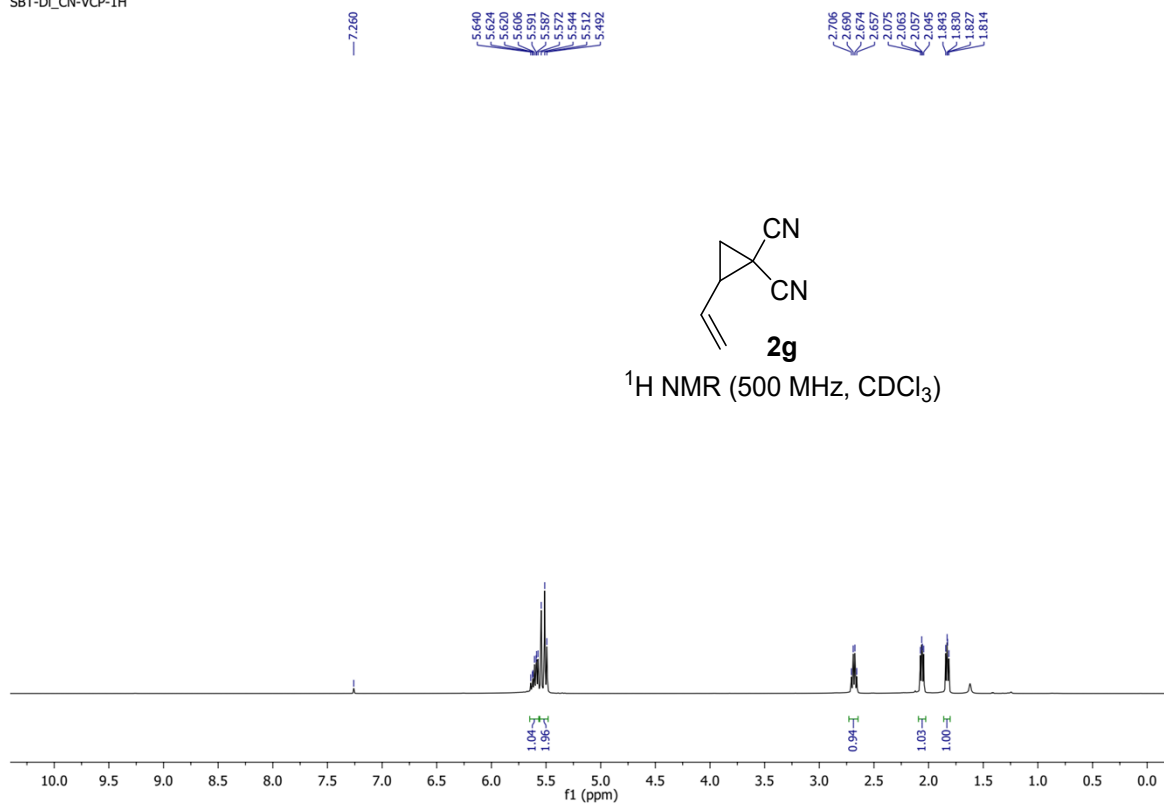

SBT-CN\_CO2Me-VCP-1H

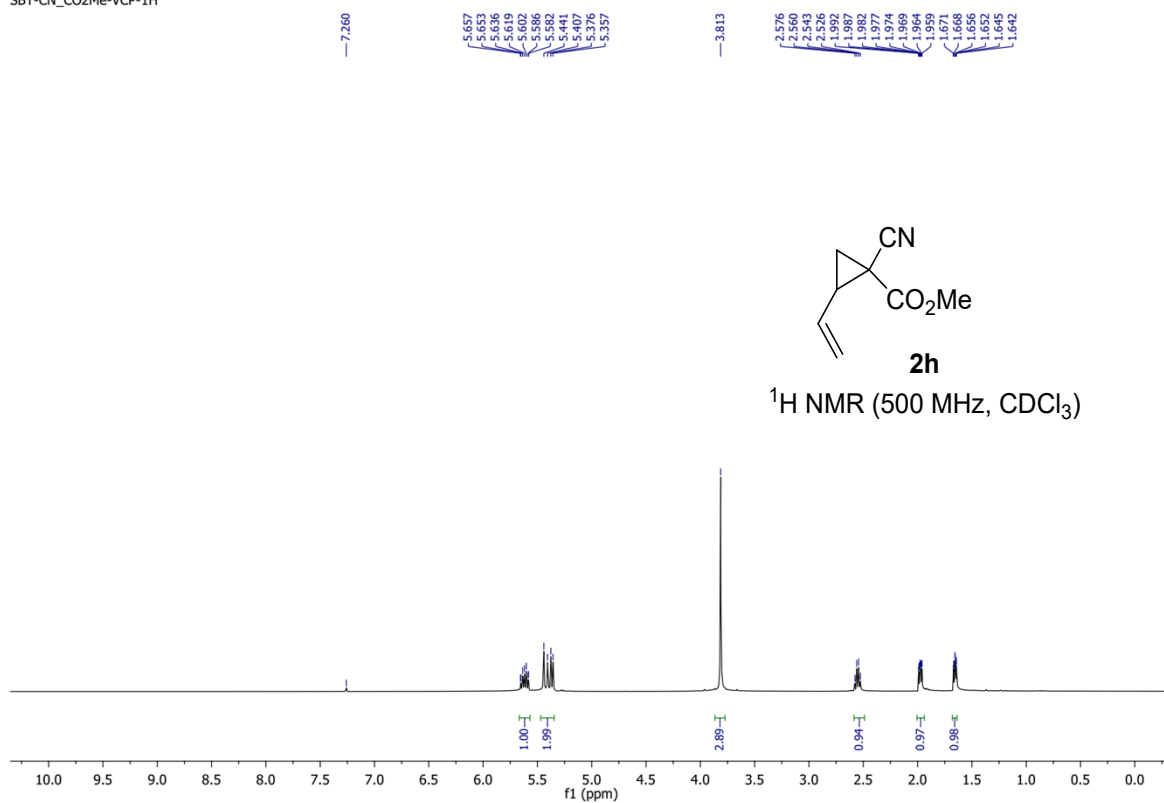

SBT-CN\_SO2Ph-VCP-1H

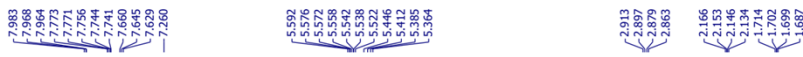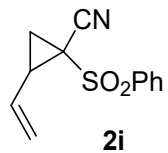

$^1\text{H}$  NMR (500 MHz,  $\text{CDCl}_3$ )

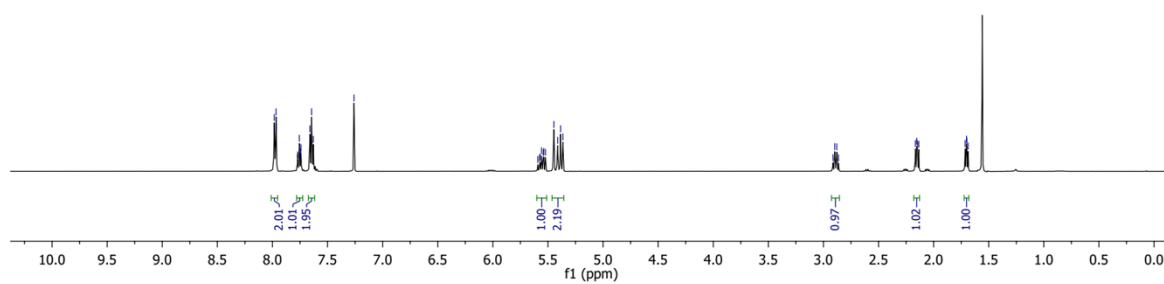

SBT-EAA\_VCP-1H

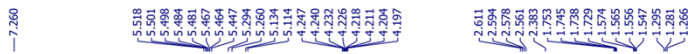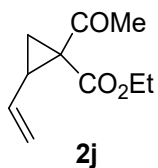

$^1\text{H}$  NMR (500 MHz,  $\text{CDCl}_3$ )

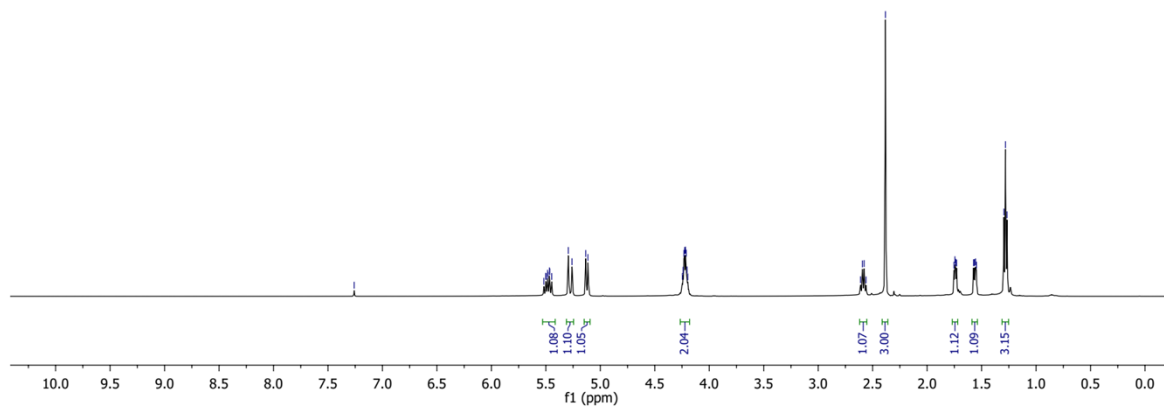

SBT-CO2Me\_Vit E-VCP-1H

7.260  
5.514  
5.385  
5.357  
5.346  
5.196  
3.806  
2.754  
2.740  
2.601  
2.590  
2.572  
2.112  
2.093  
2.051  
2.046  
2.039  
2.032  
1.997  
1.987  
1.958  
1.883  
1.875  
1.870  
1.861  
1.805  
1.800  
1.764  
1.713  
1.705  
1.698  
1.690  
1.597  
1.597  
1.586  
1.556  
1.545  
1.534  
1.523  
1.512  
1.366  
1.328  
1.318  
1.311  
1.305  
1.303  
1.293  
1.291  
1.289  
1.284  
1.279  
1.267  
1.260  
1.260  
1.255  
1.244  
1.241  
1.167  
1.163  
1.159  
1.156  
1.152  
1.147  
1.145  
1.136  
1.131  
1.126  
1.124  
1.115  
1.113  
1.105  
1.104  
1.100  
1.097  
1.091  
1.086  
1.082  
1.079  
1.075  
1.064  
1.058  
0.882  
0.871  
0.859  
0.849

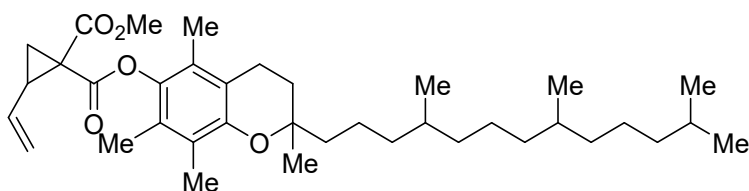

**2k**

<sup>1</sup>H NMR (600 MHz, CDCl<sub>3</sub>)

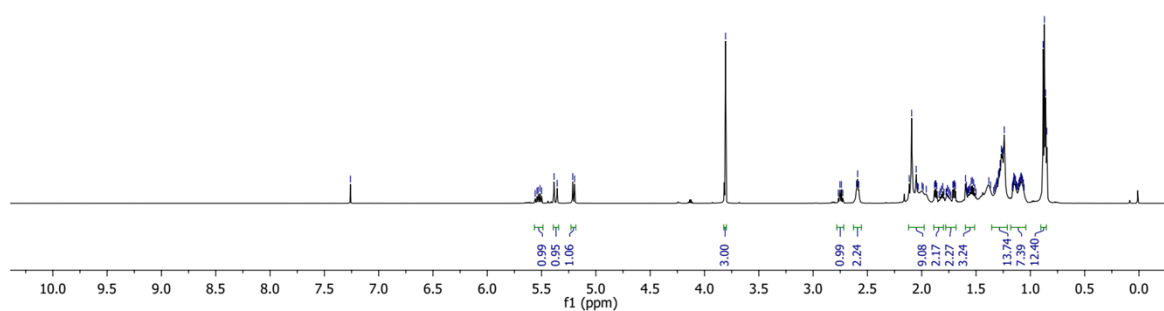

SBT-CO2Me\_Vit E-VCP-13C

168.436  
167.994  
149.702  
140.506  
132.951  
119.054  
117.622  
77.372  
77.160  
76.949  
73.242  
52.731  
39.523  
37.703  
37.070  
37.696  
37.606  
37.538  
37.439  
35.950  
32.940  
32.924  
32.844  
32.843  
31.293  
28.127  
24.962  
24.948  
24.589  
24.565  
22.277  
21.182  
21.004  
20.734  
19.898  
19.835  
19.366  
19.276  
12.889  
12.046  
11.935

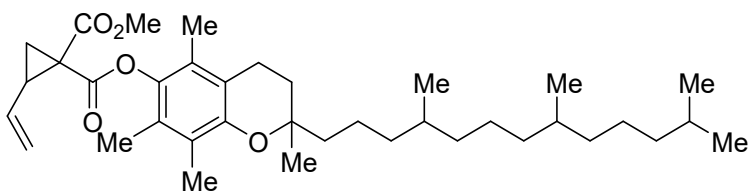

**2k**

<sup>13</sup>C NMR (150 MHz, CDCl<sub>3</sub>)

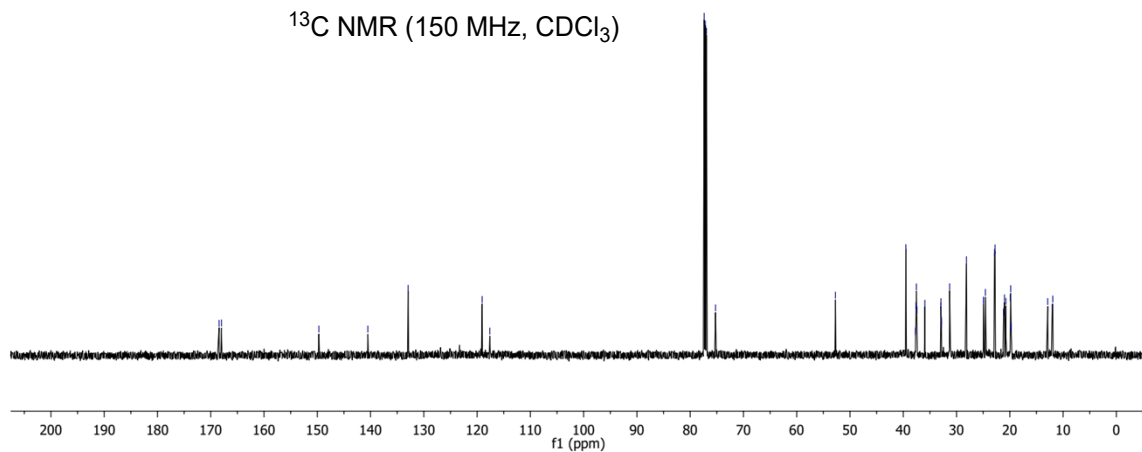

SBT-VAZ-1H

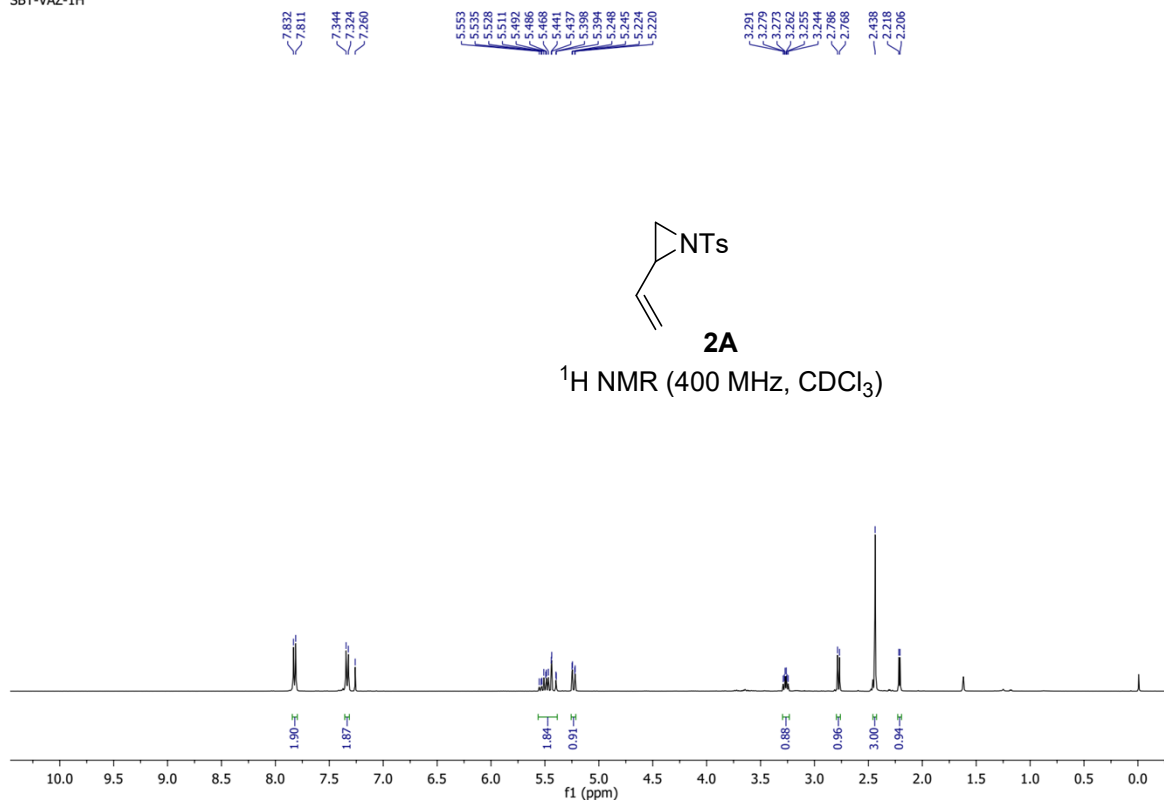

SBT-AC\_DG-VCP-1H

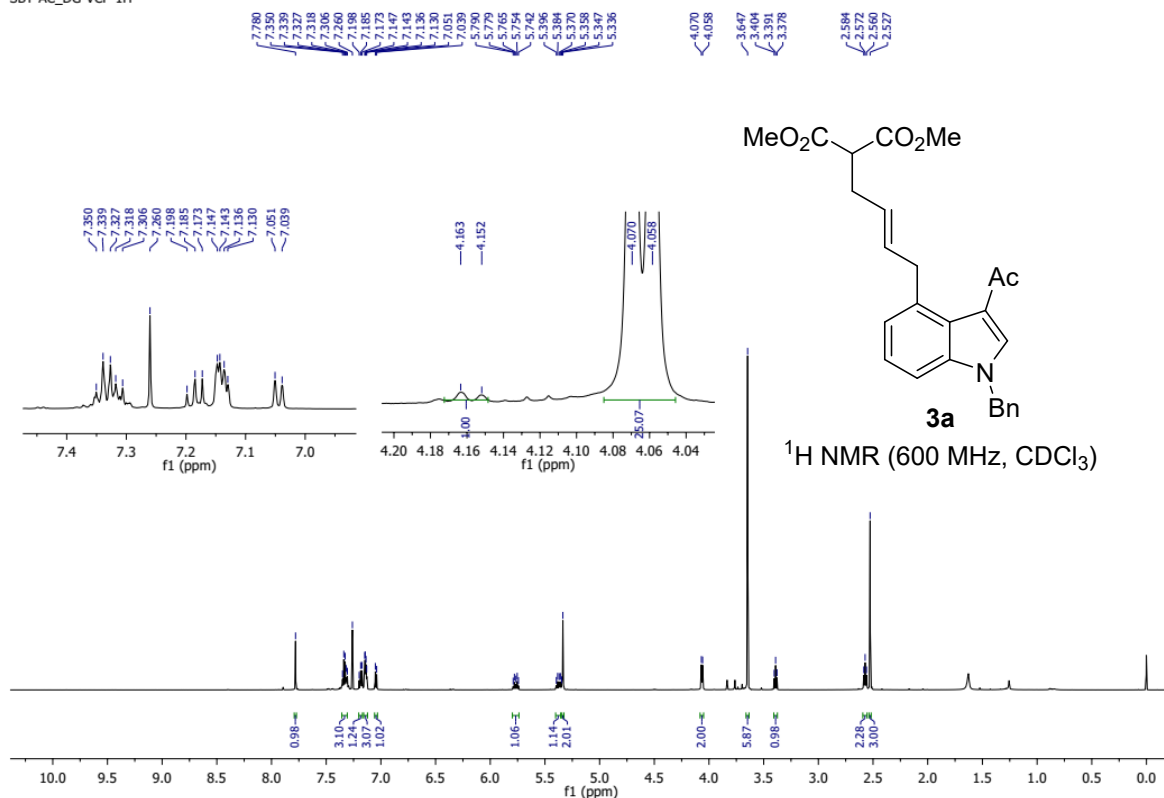

SBT-AC-DG-VCP-13C

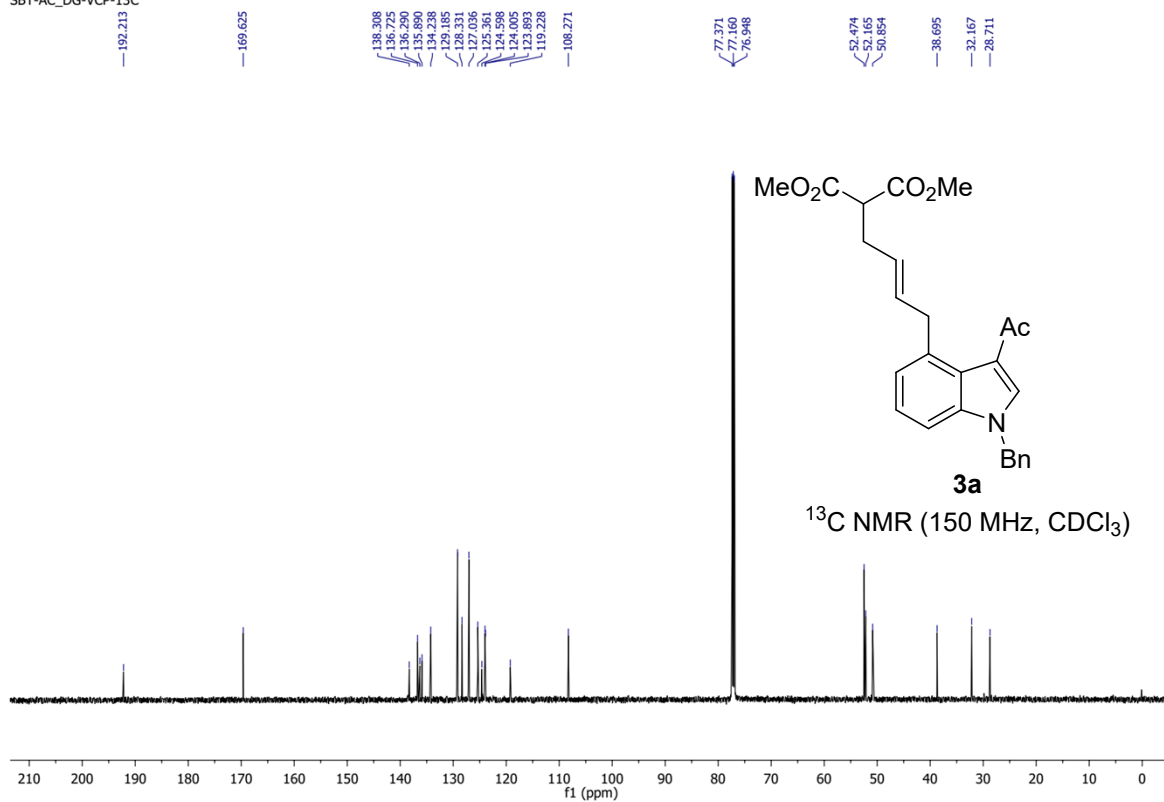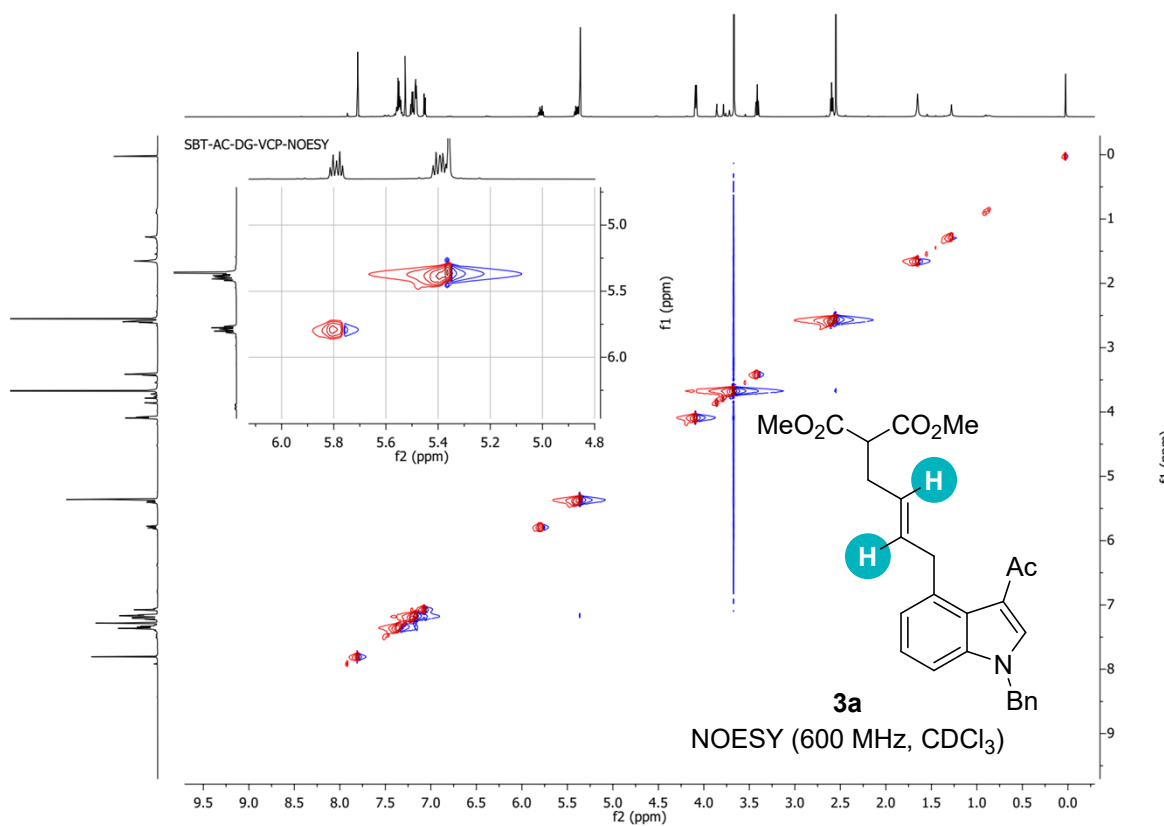

SBT-2ME-VCP-1H

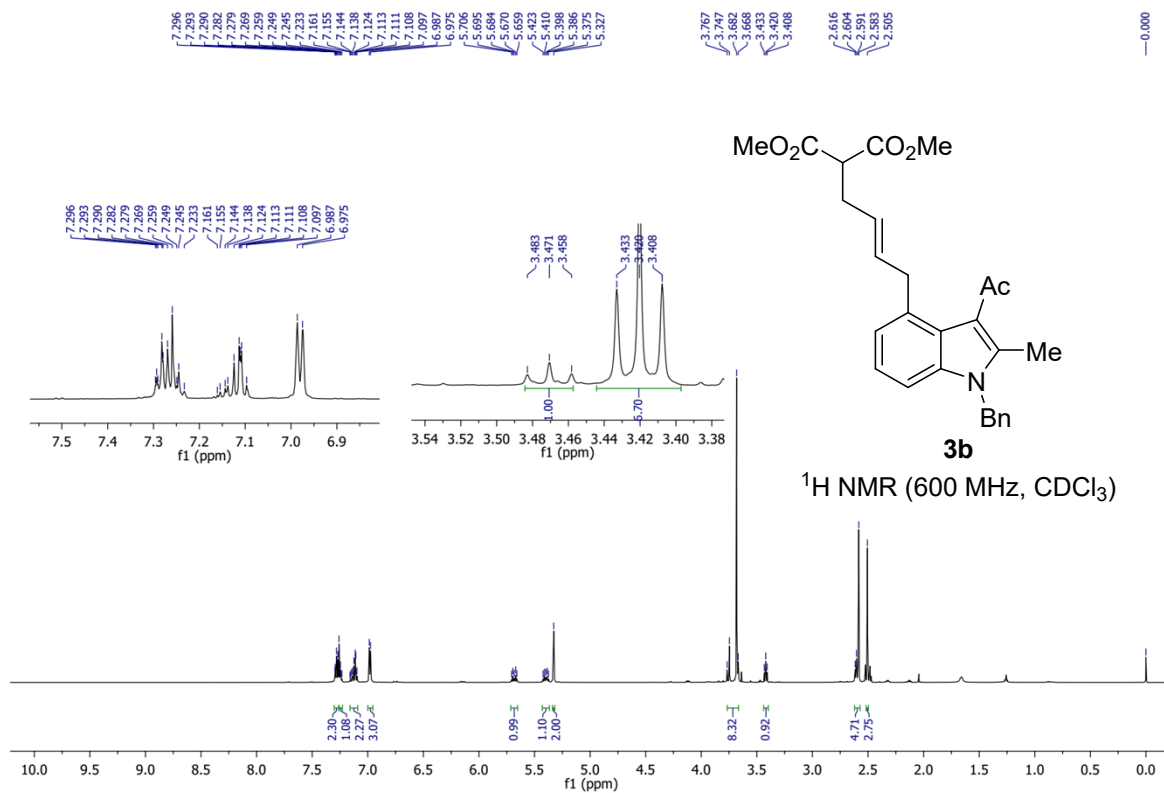

SBT-2ME-VCP-13C

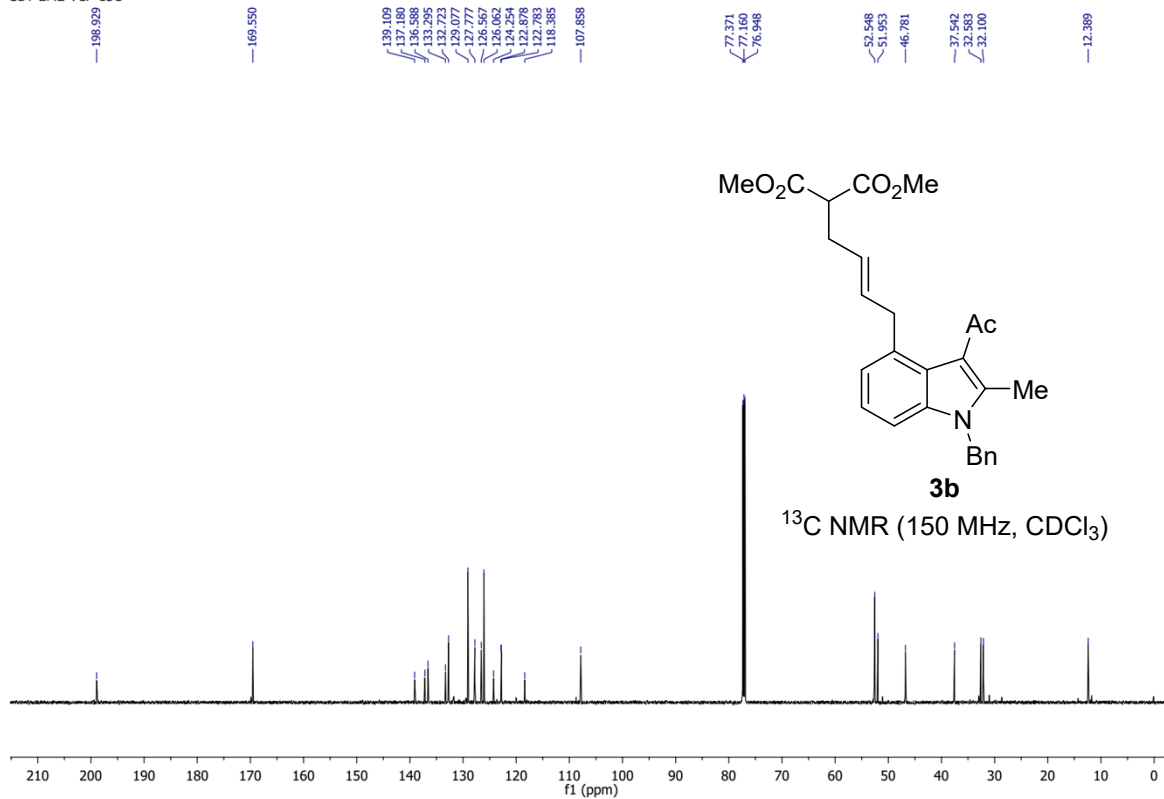

SBT-5F-VCP-1H

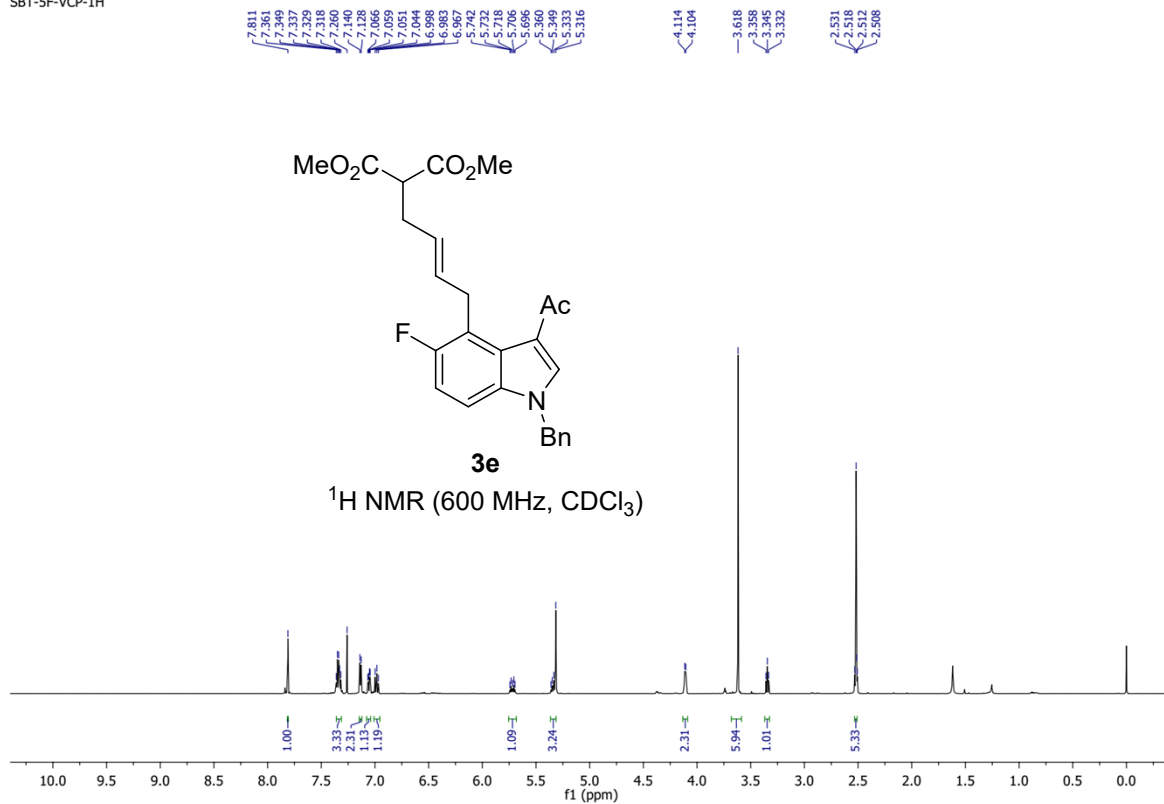

SBT-5F-VCP-13C

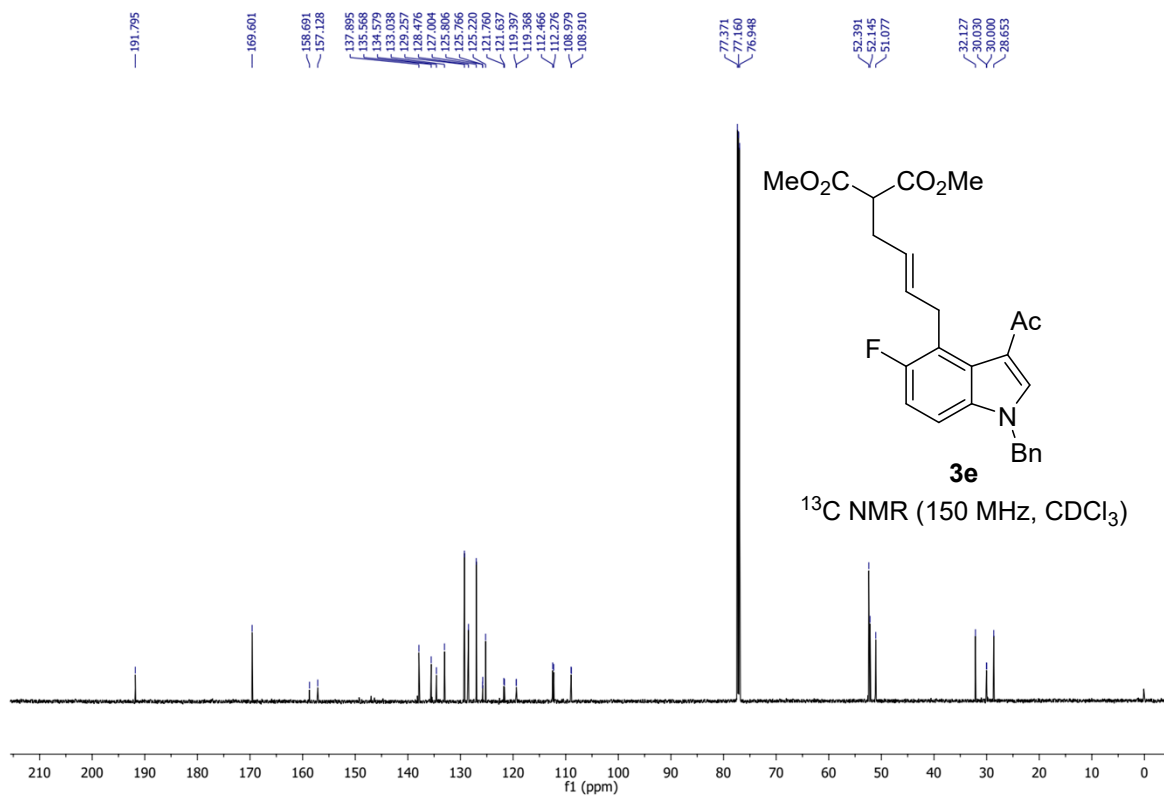

SBT-5F-DG-VCP-19F

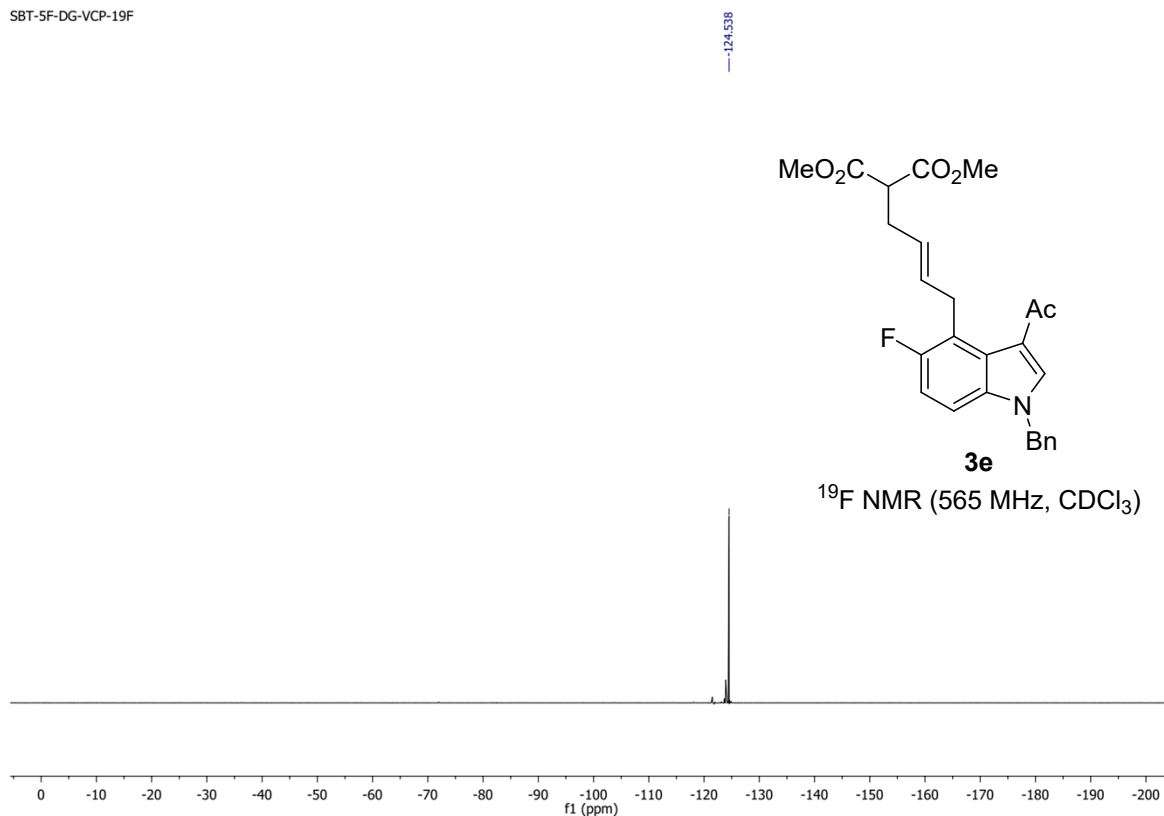

SBT-5OME-VCP-1H

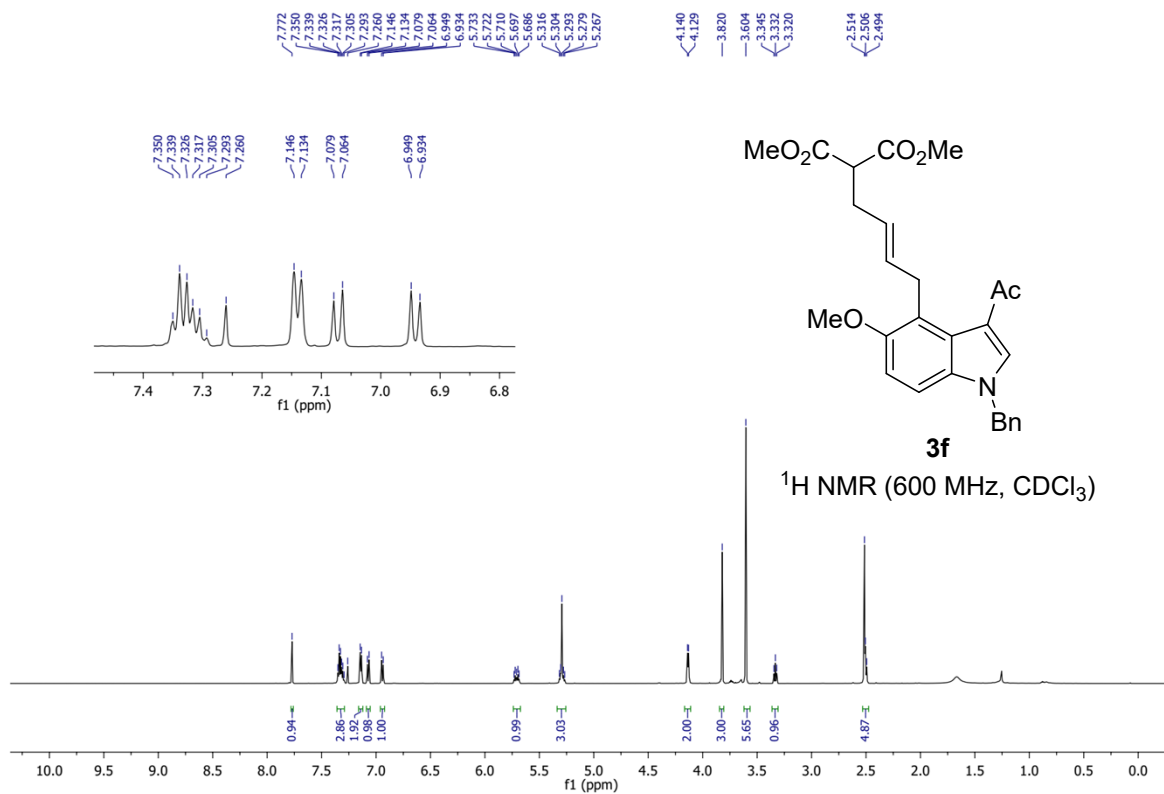



SBT-5OME-VCP-13C

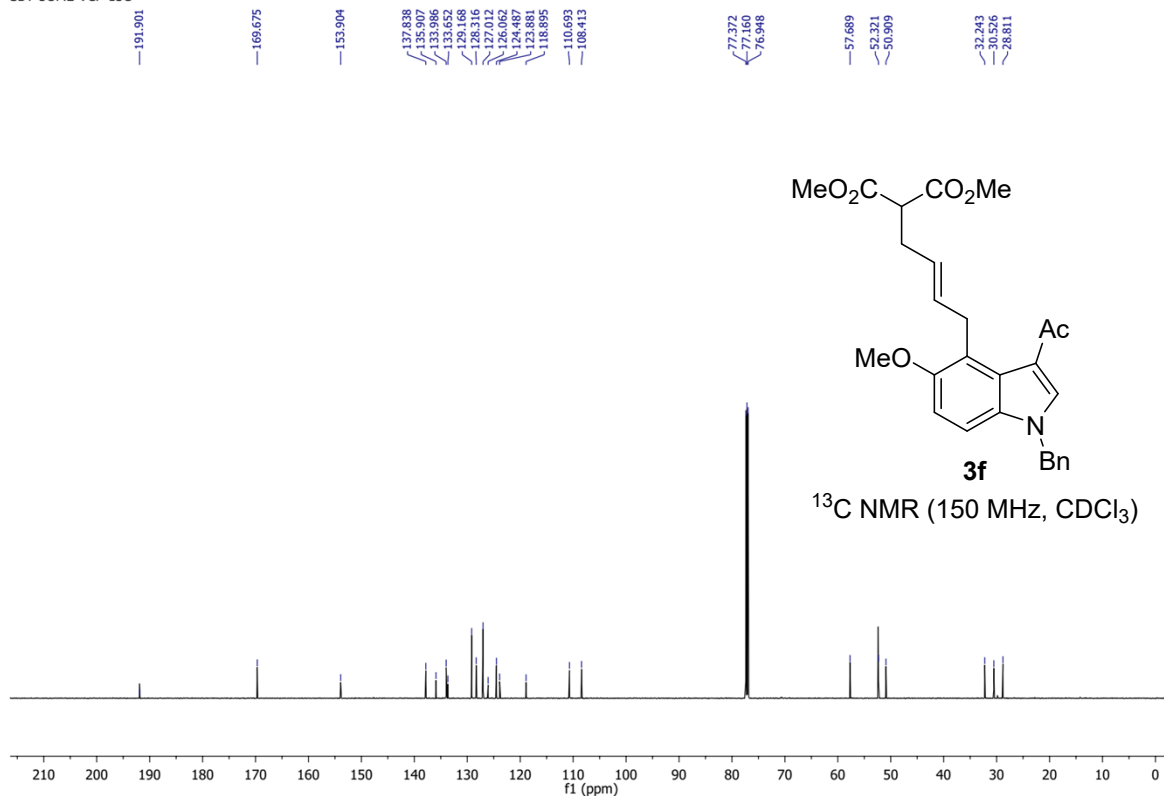

SBT-6-Br-VCP-1H

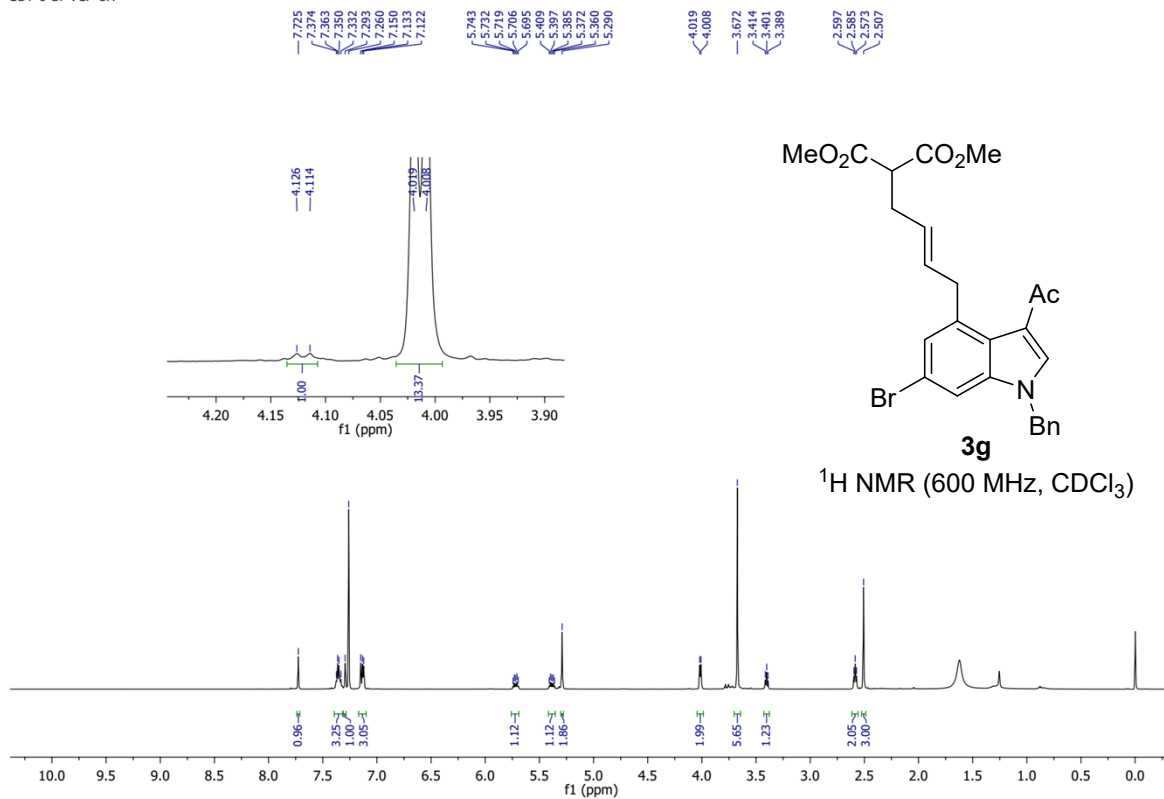

SBT-6-Br-VCP-13C

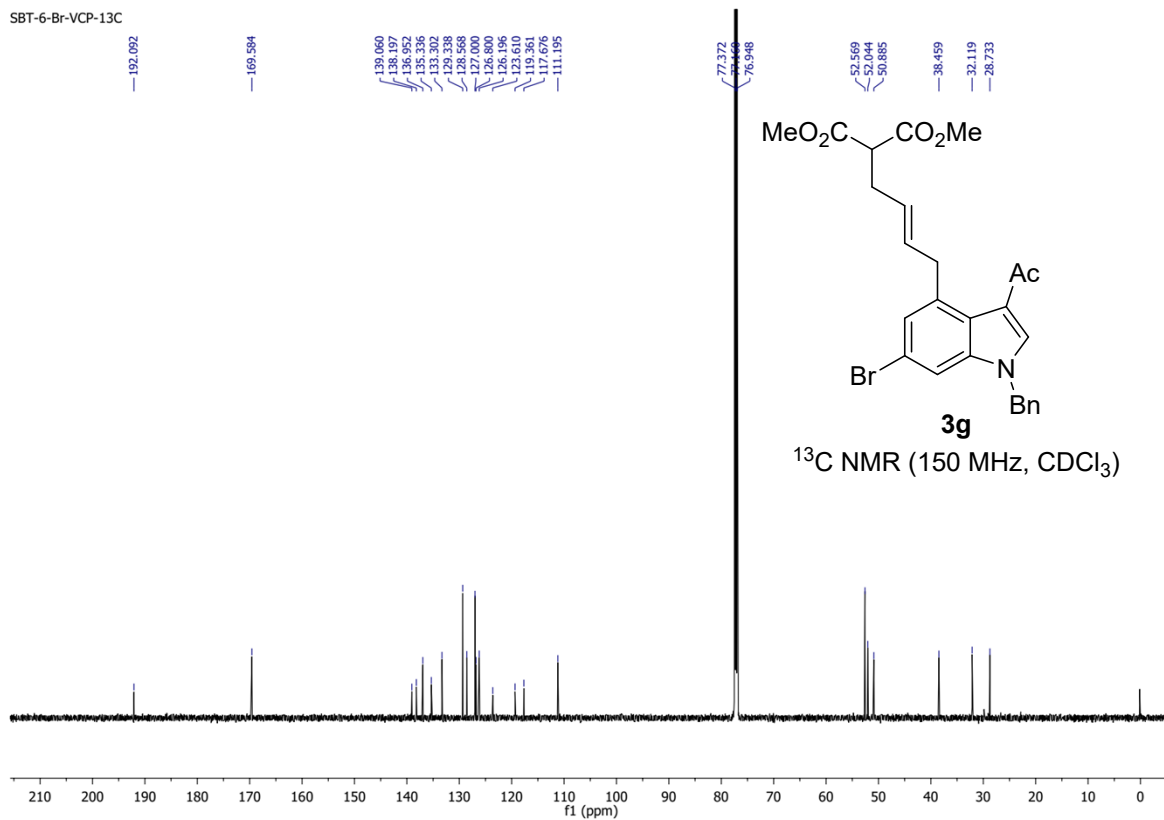

SBT-6Cl-VCP-1H

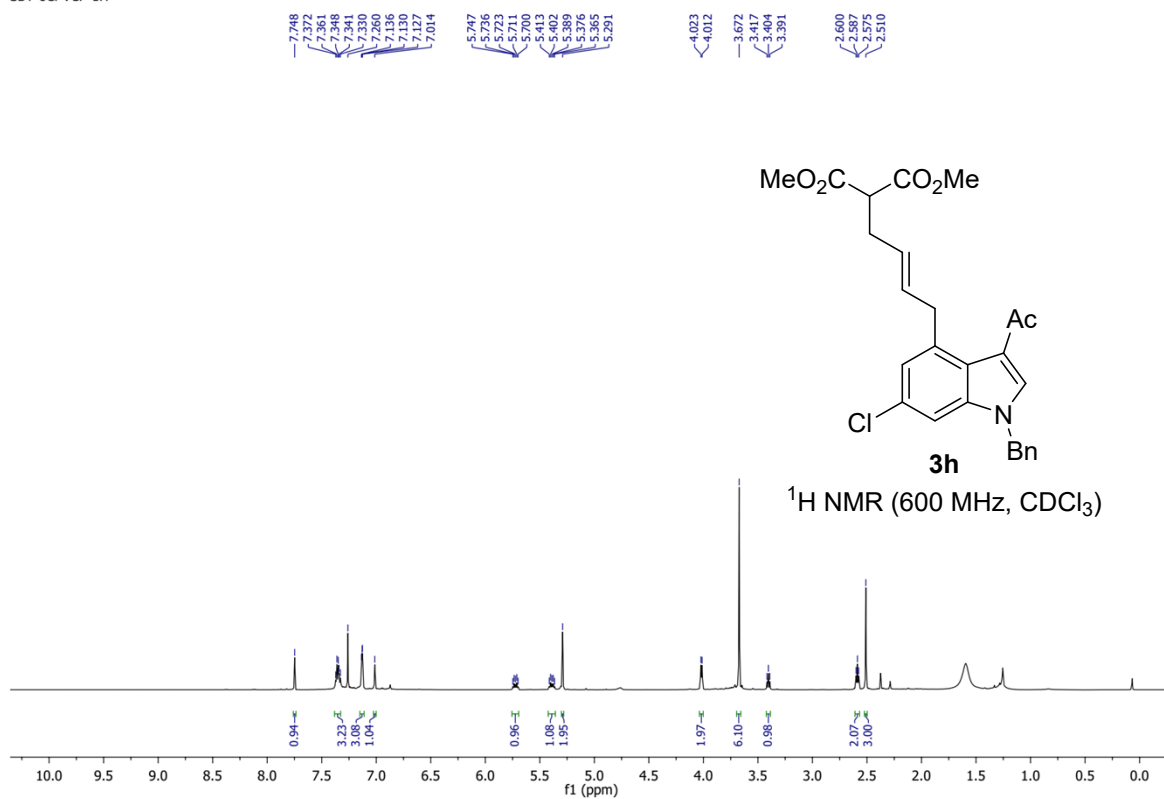

SBT-6Cl-VCP-13C

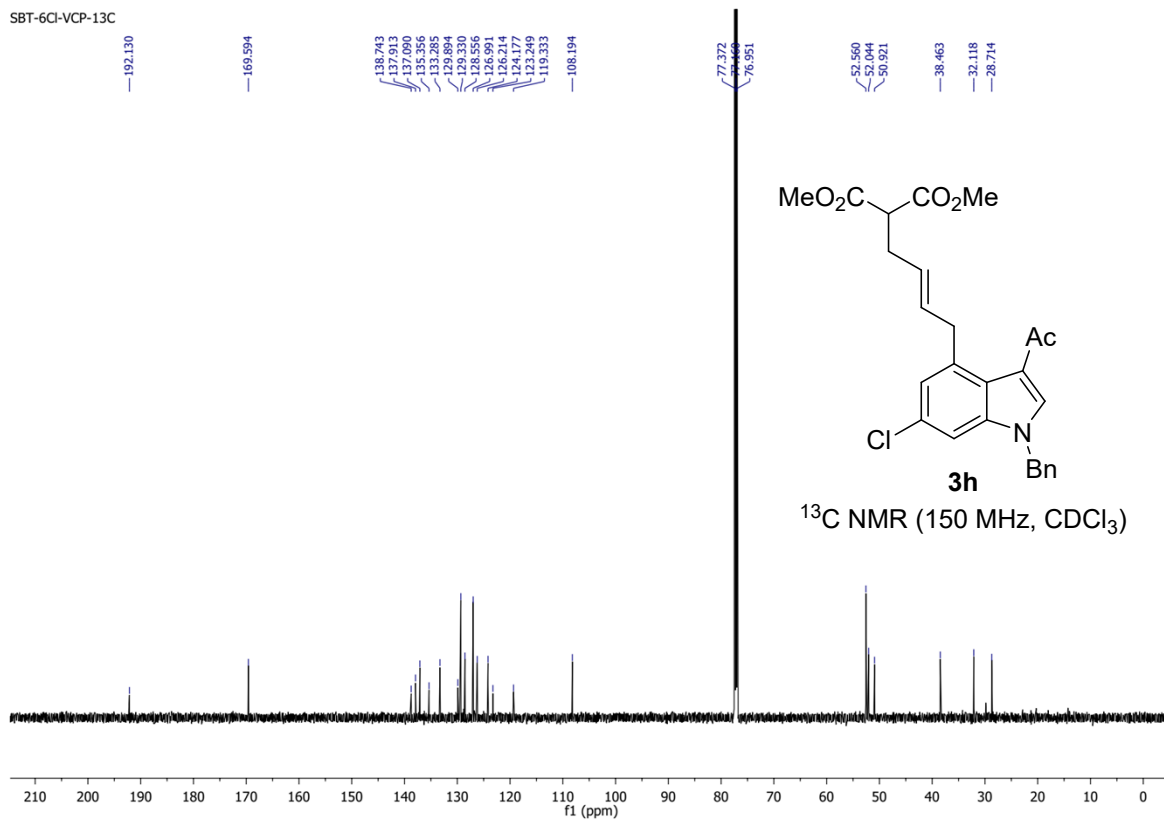

SBT-6F-VCP-1H

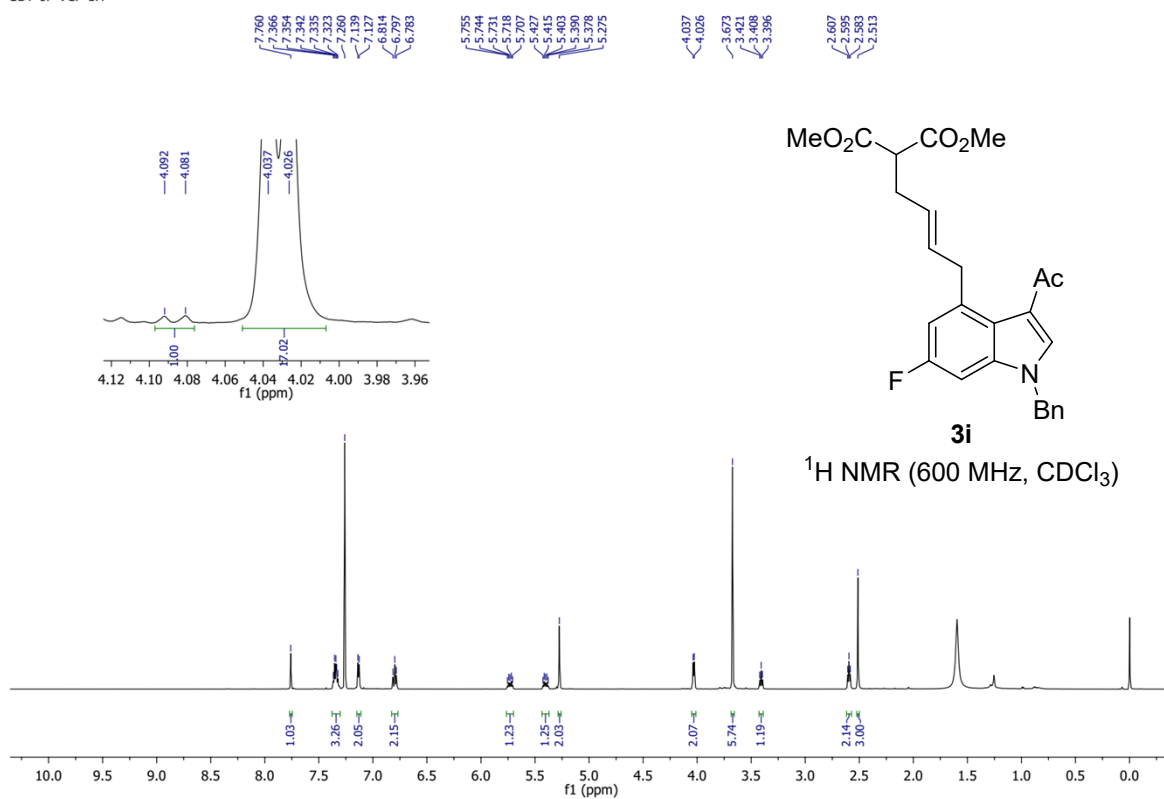

SBT-6F-VCP-13C

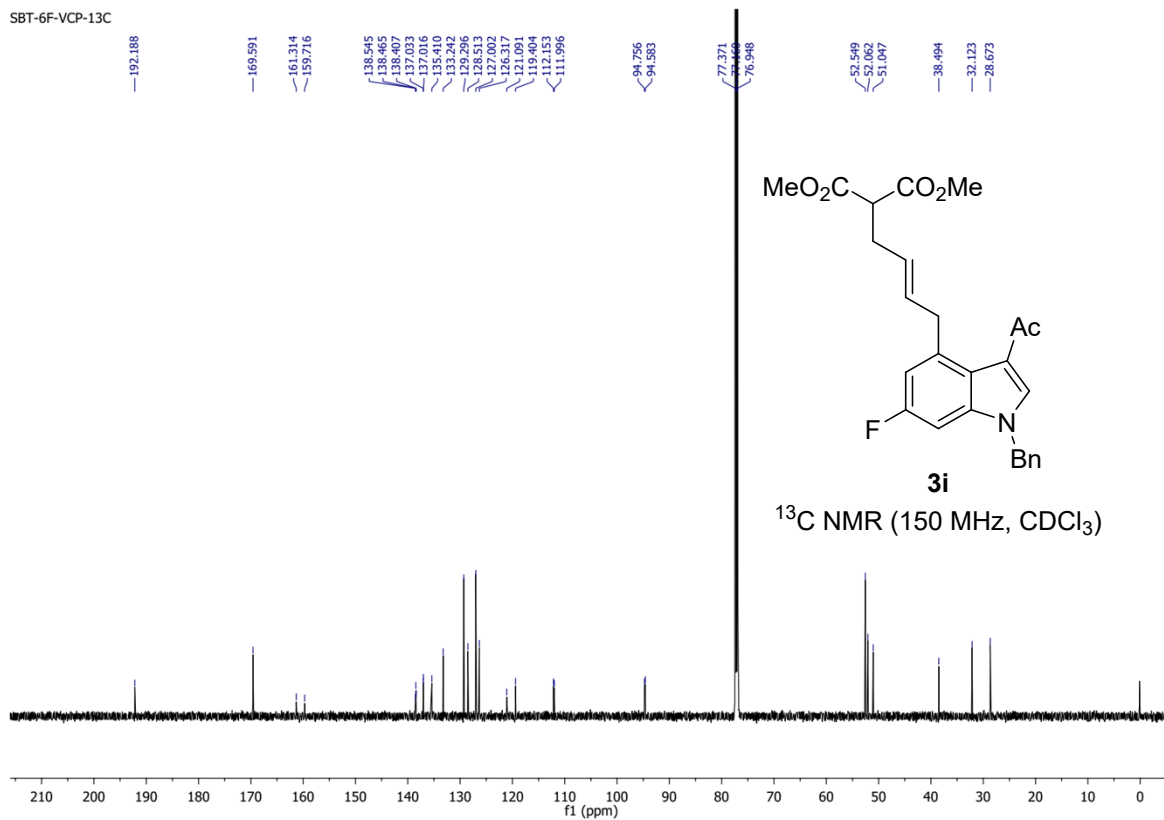

SBT-6F-VCP-19F

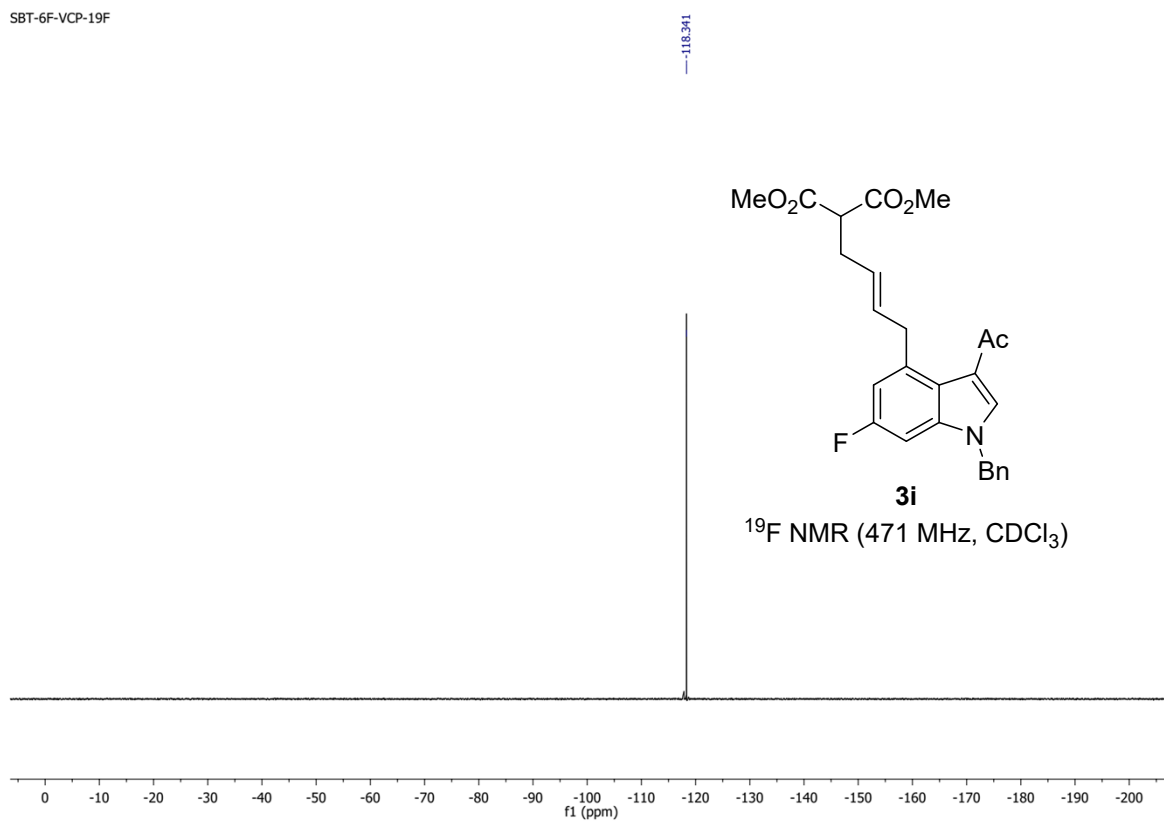

SBT-6PMP-VCP-1H

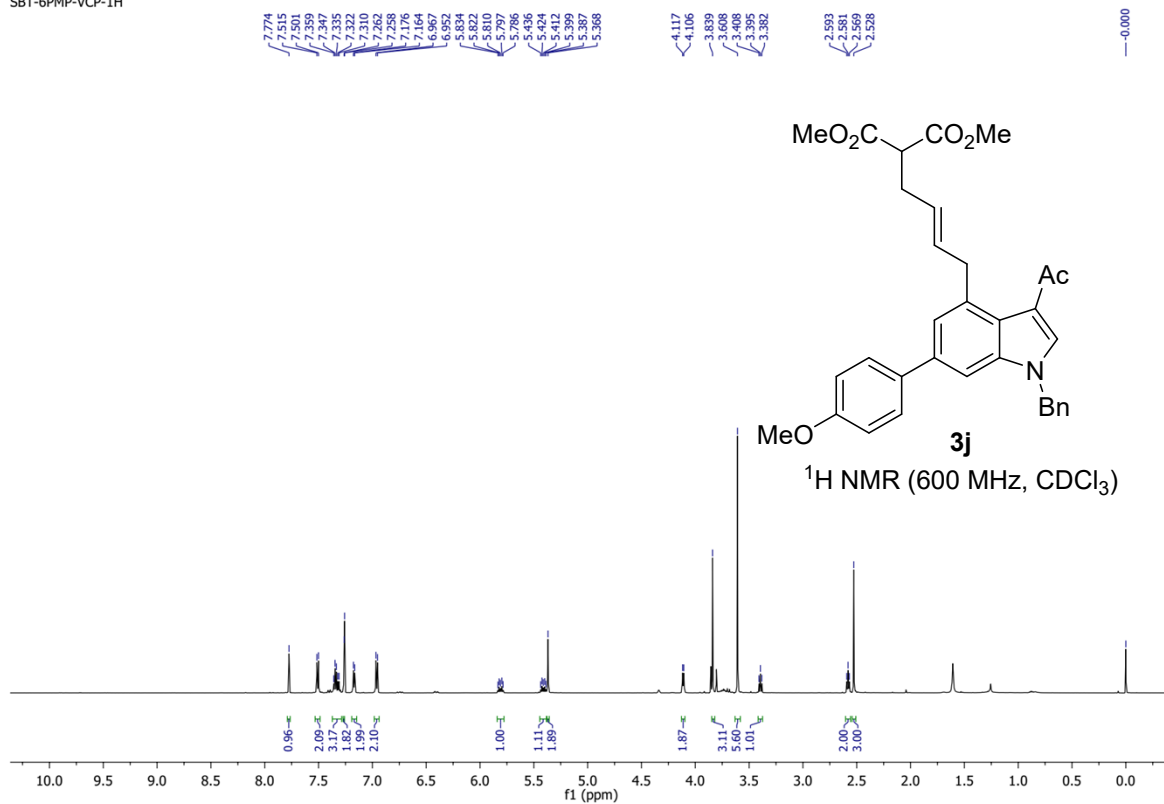

SBT-6PMP-VCP-13C

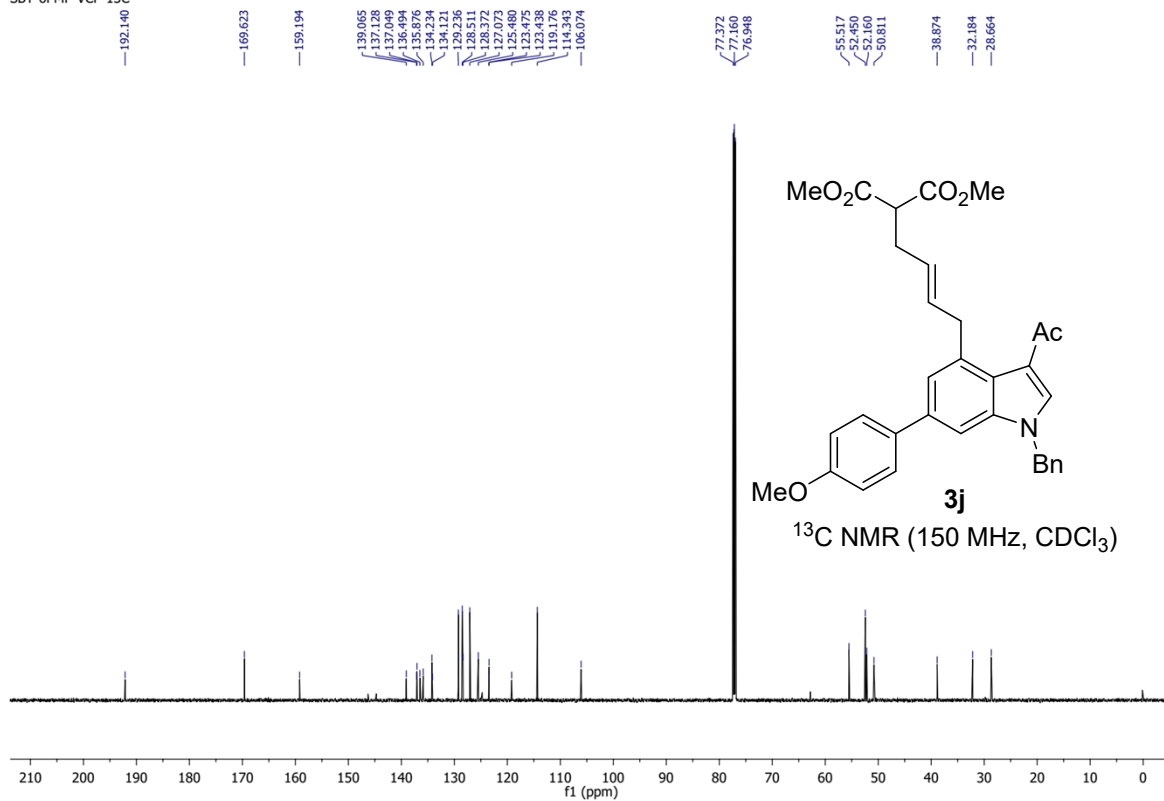

SBT-7Cl-VCP-1H

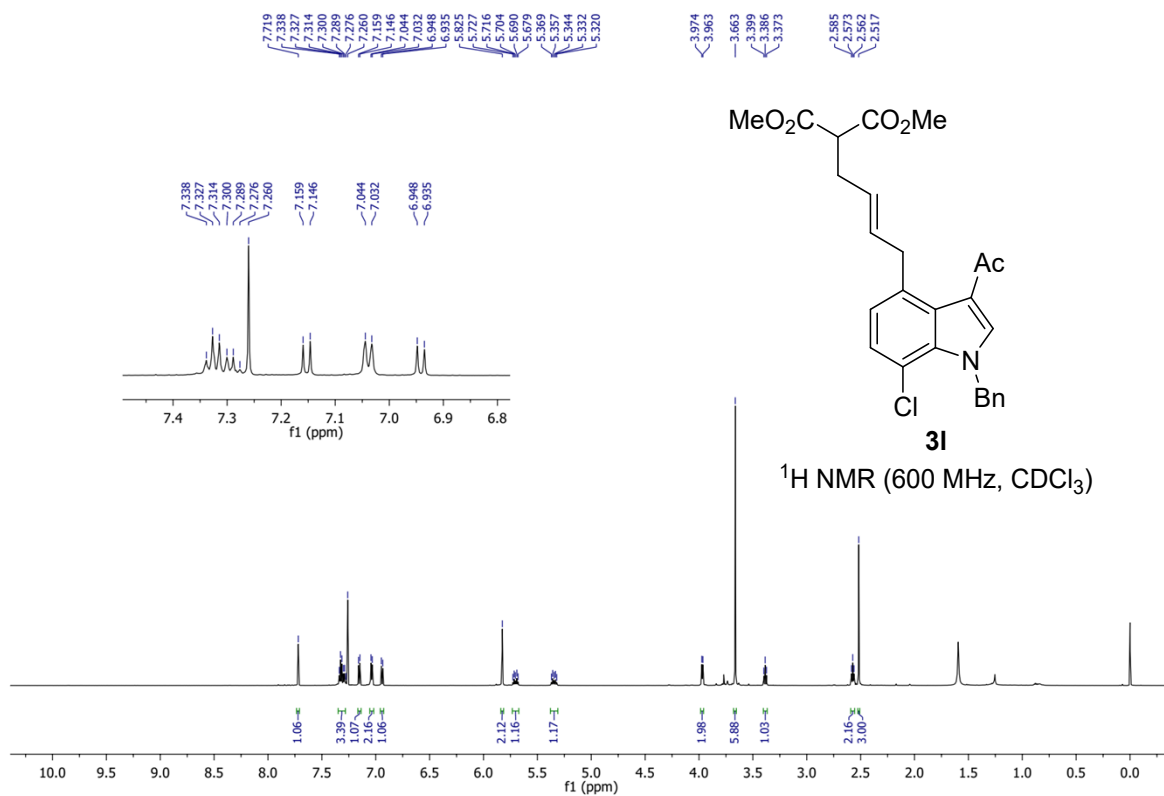

SBT-7Cl-VCP-13C

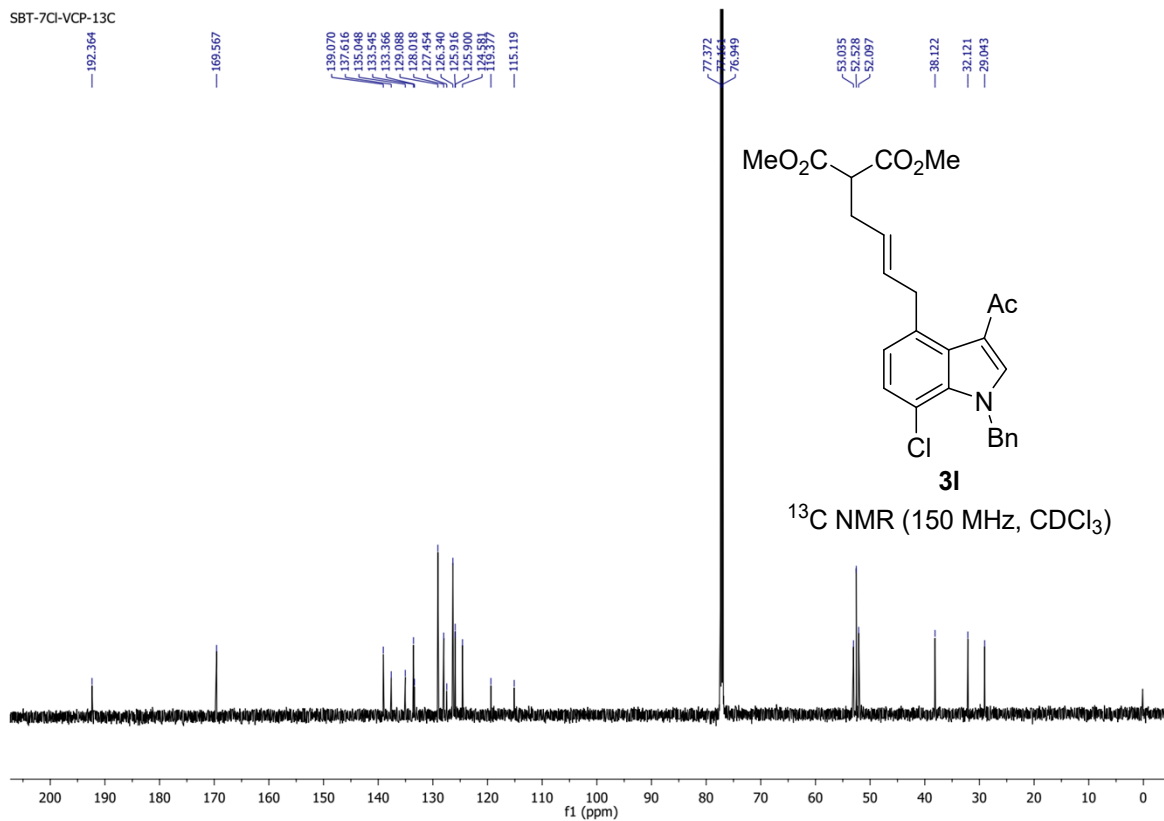

SBT-7OME-VCP-1H

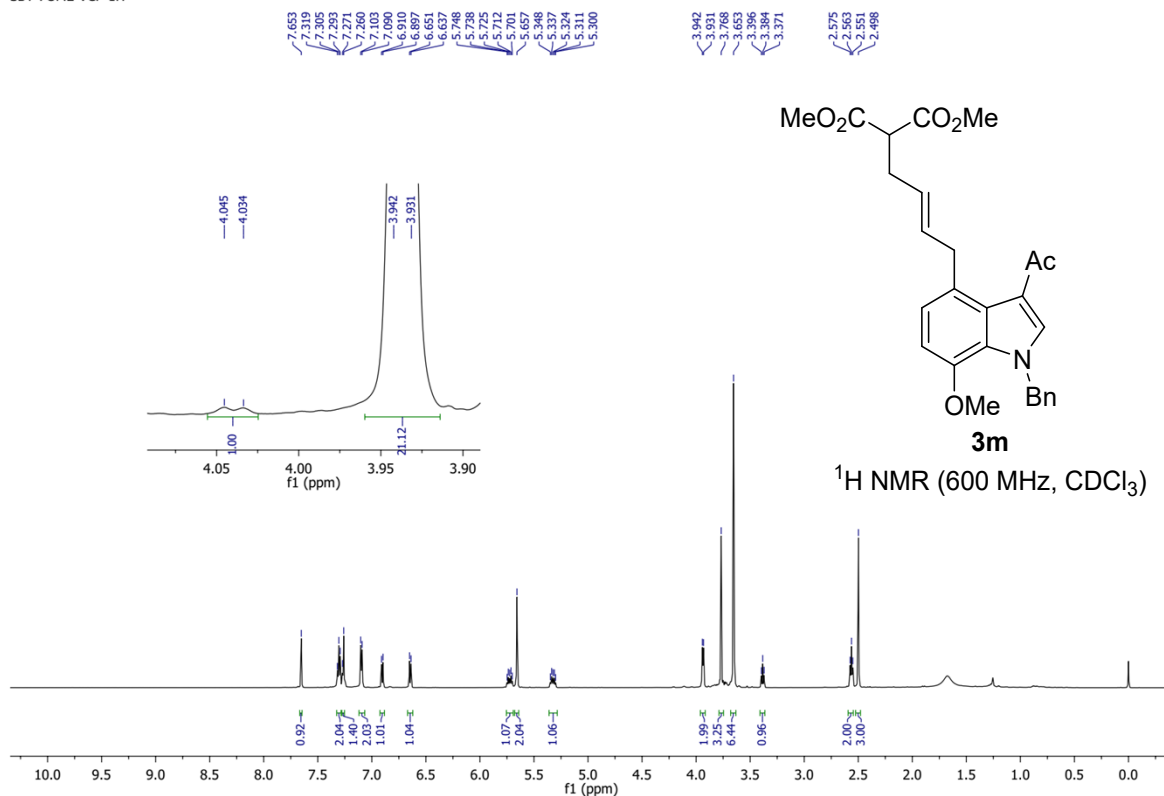

SBT-7OME-VCP-13C

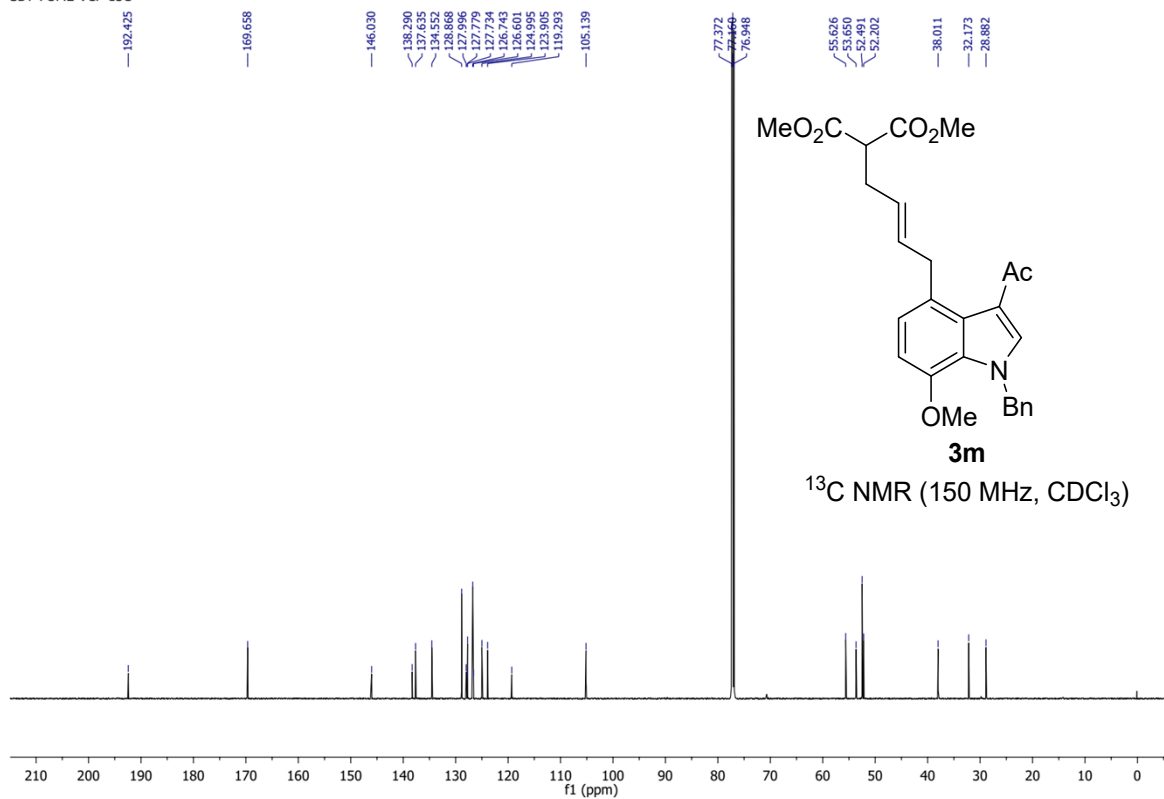

SBT-7ME-VCP-1H

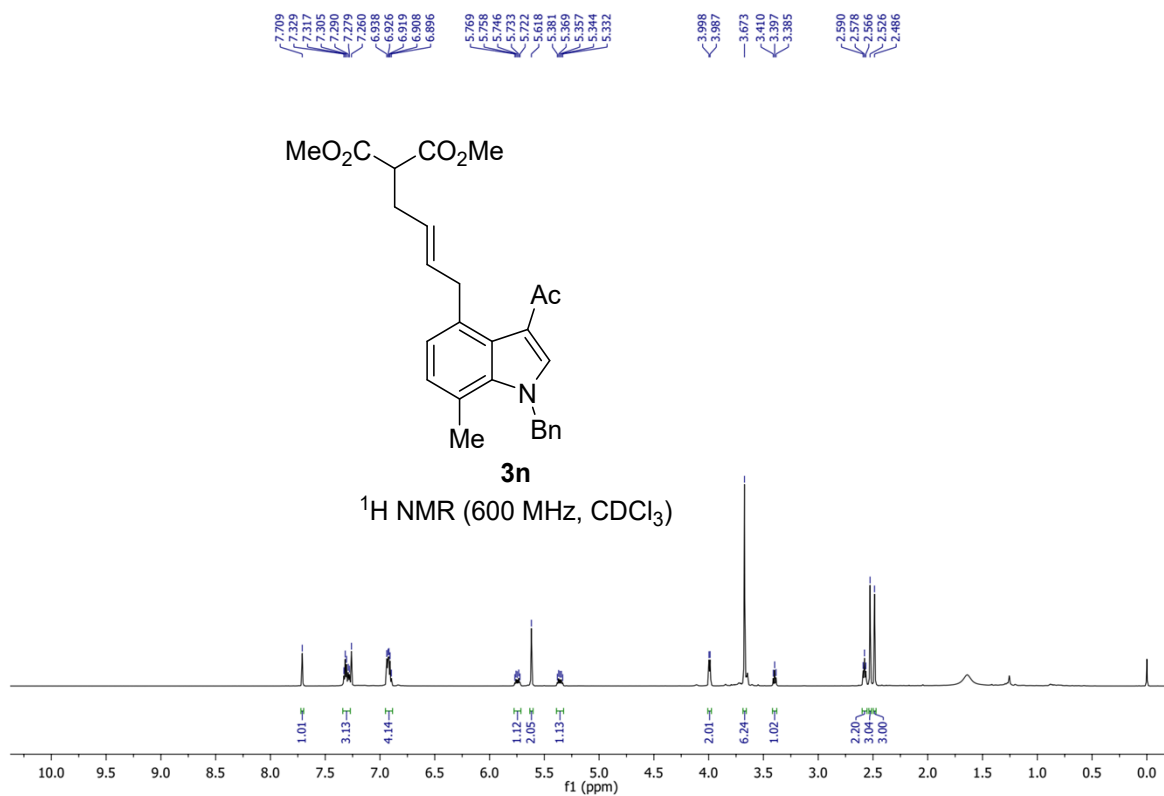

SBT-7ME-VCP-13C

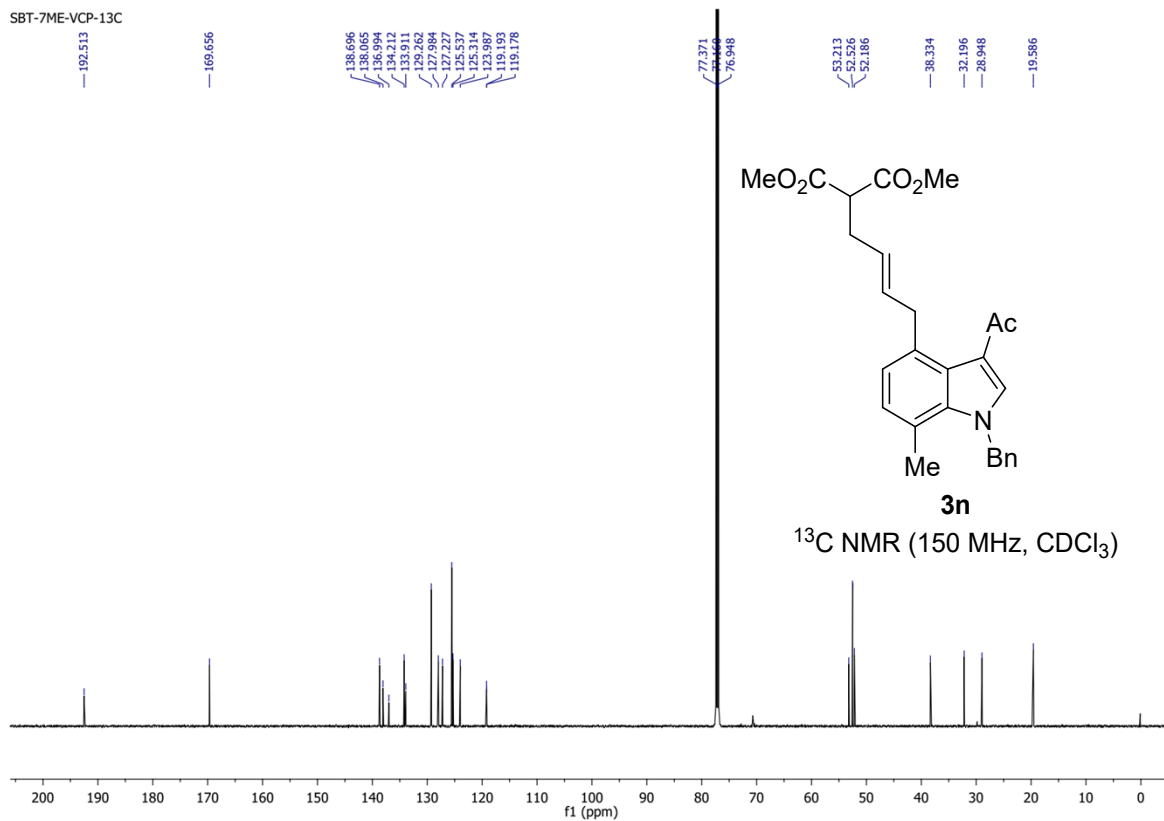



SBT-PENTA g-VCP-1H

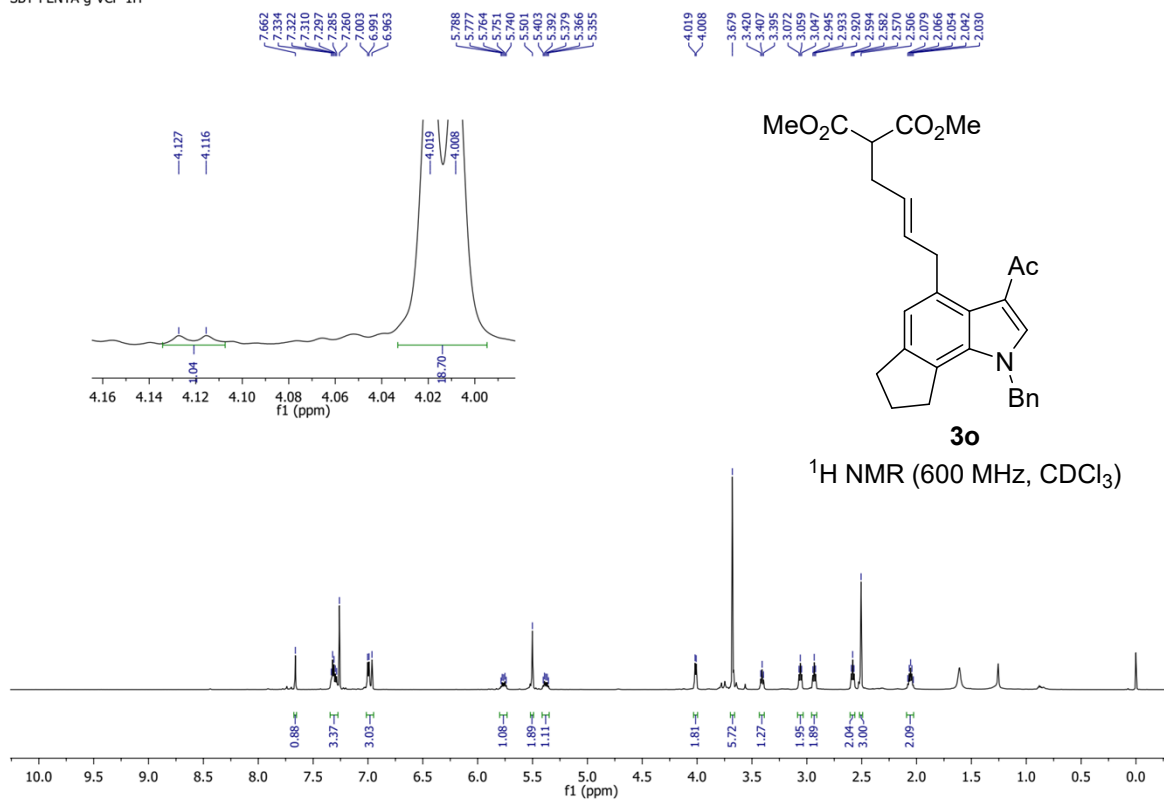

SBT-PENTA g-VCP-13C

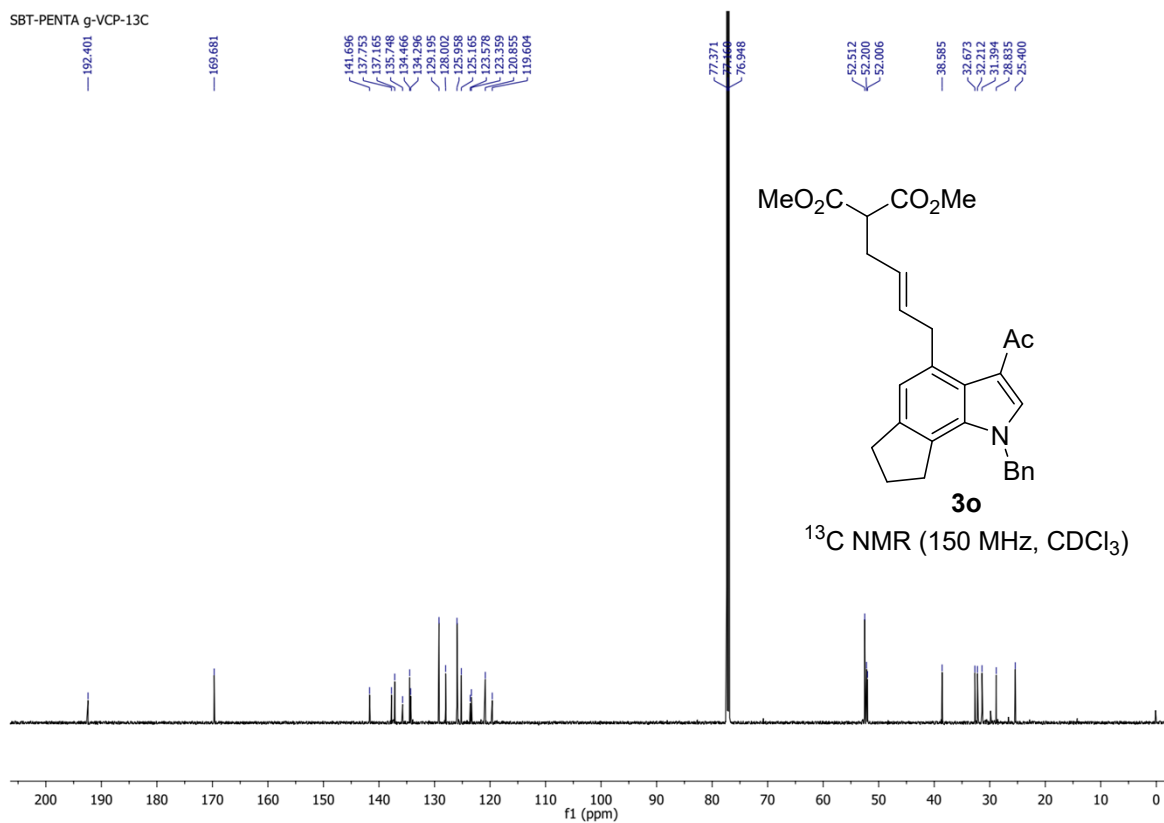

SBT-BENZO g-VCP-1H

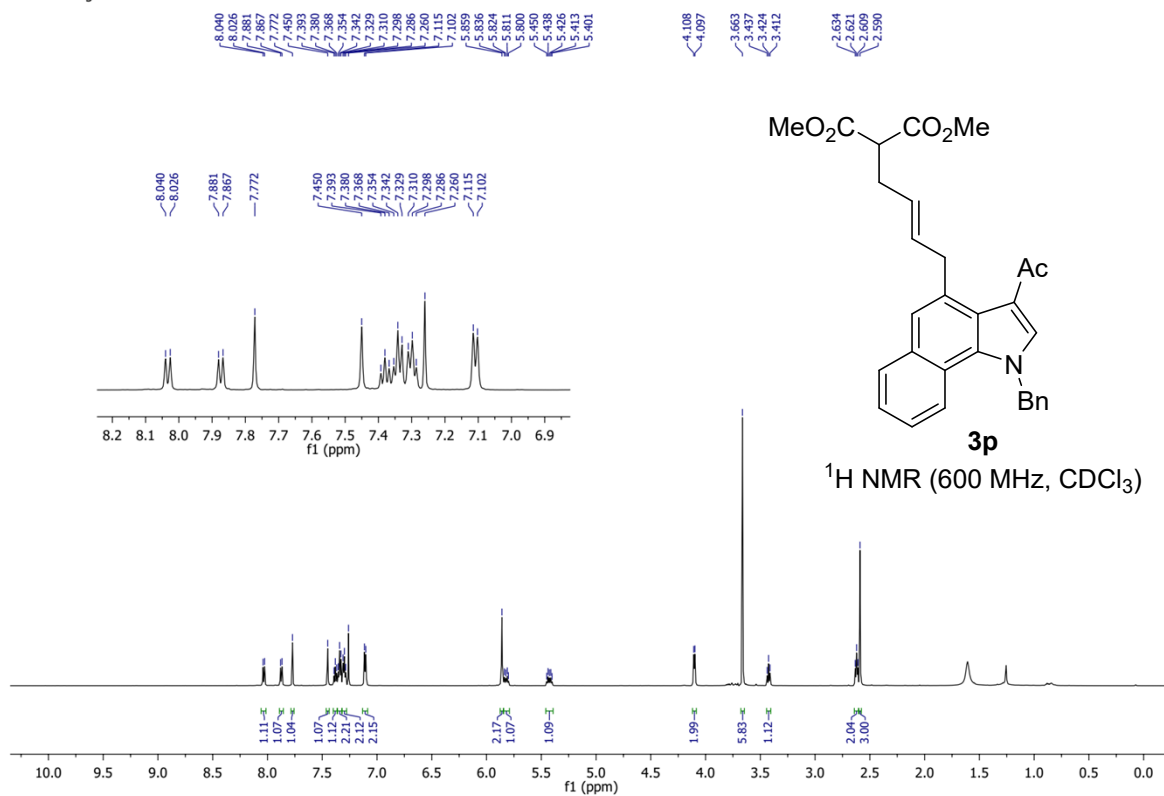

SBT-BENZO g-VCP-13C

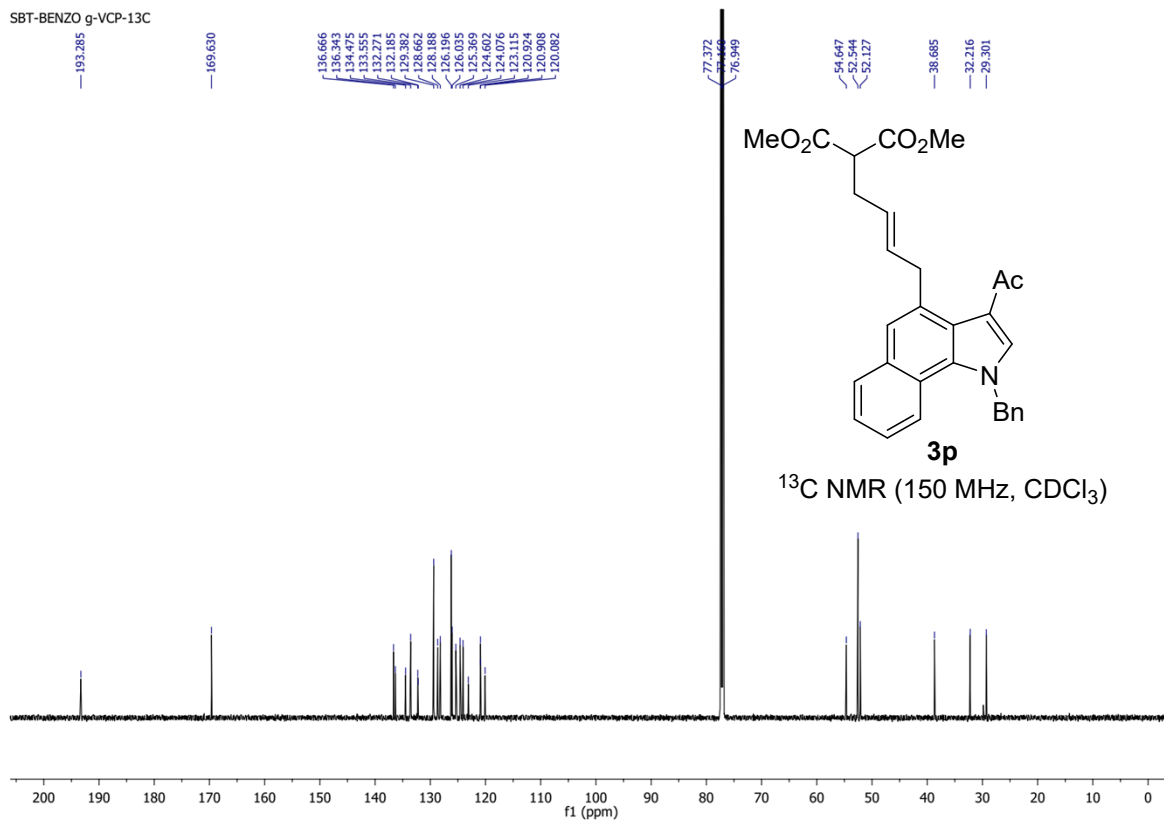

SBT-NH-AC-VCP-1H

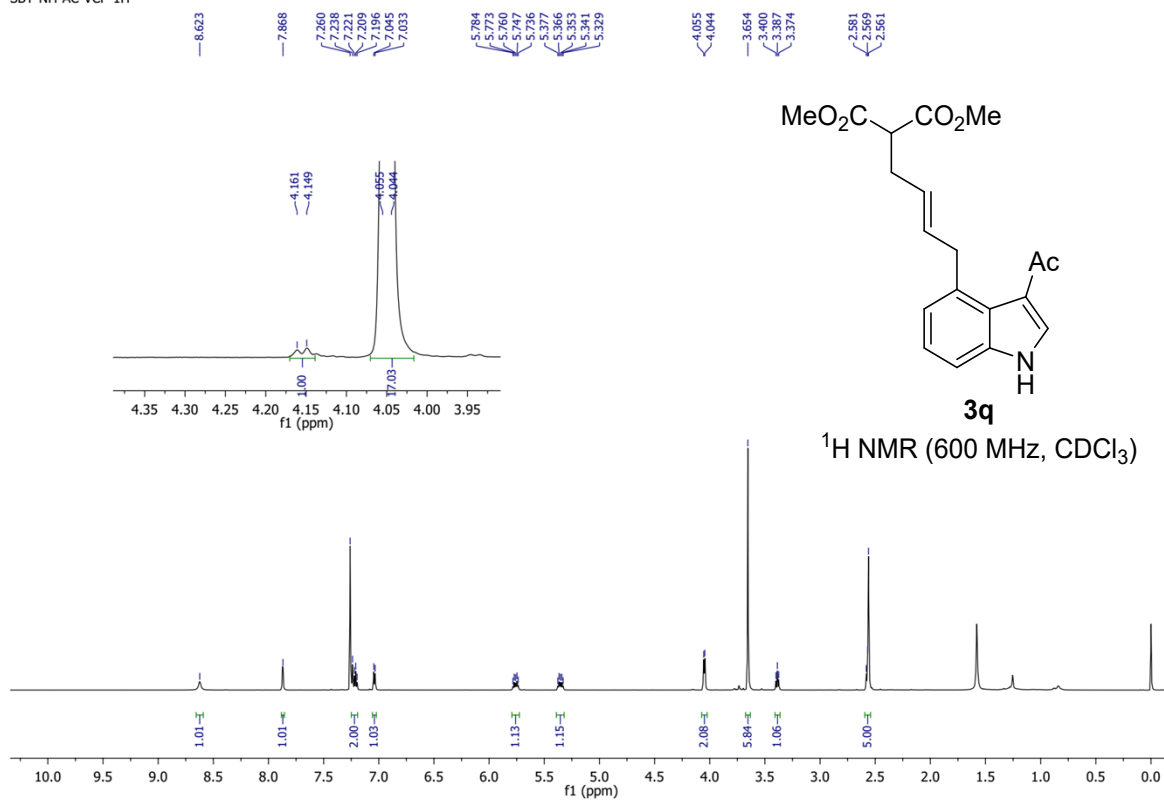

SBT-NH-AC-VCP-13C

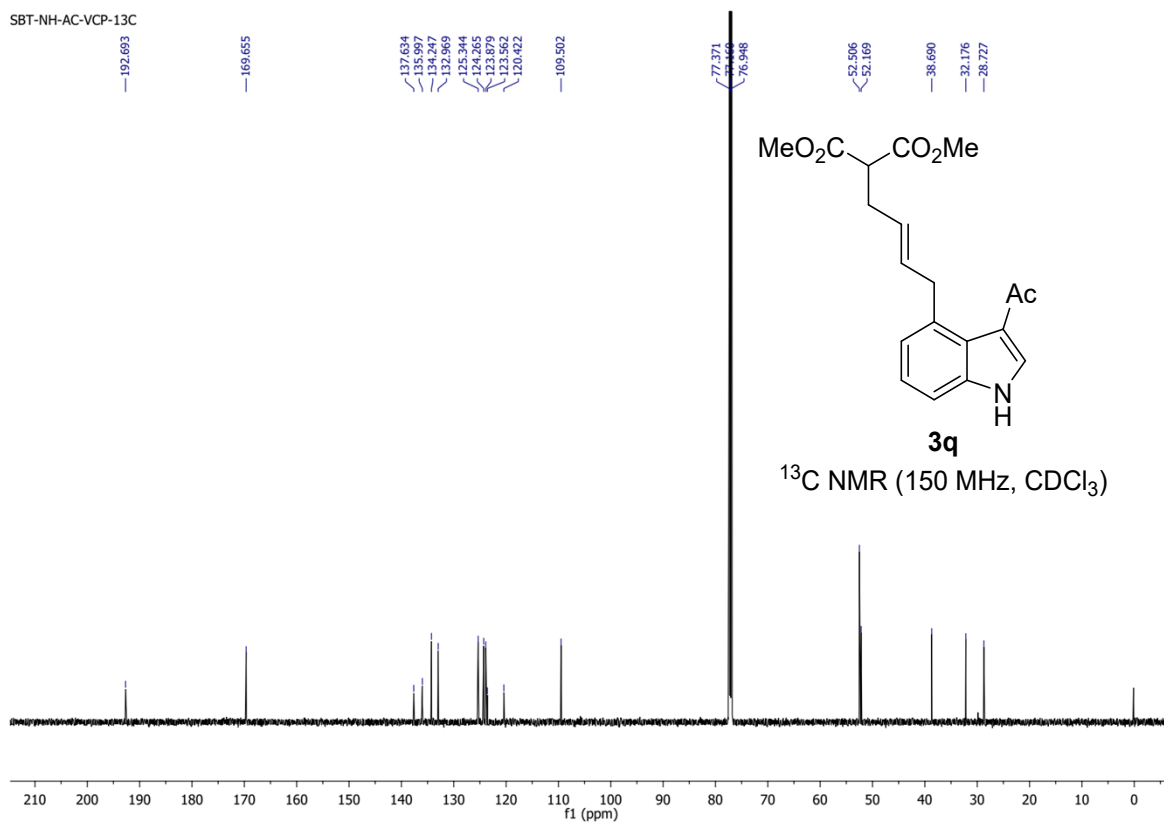

SBT-N-OCT-VCP-1H

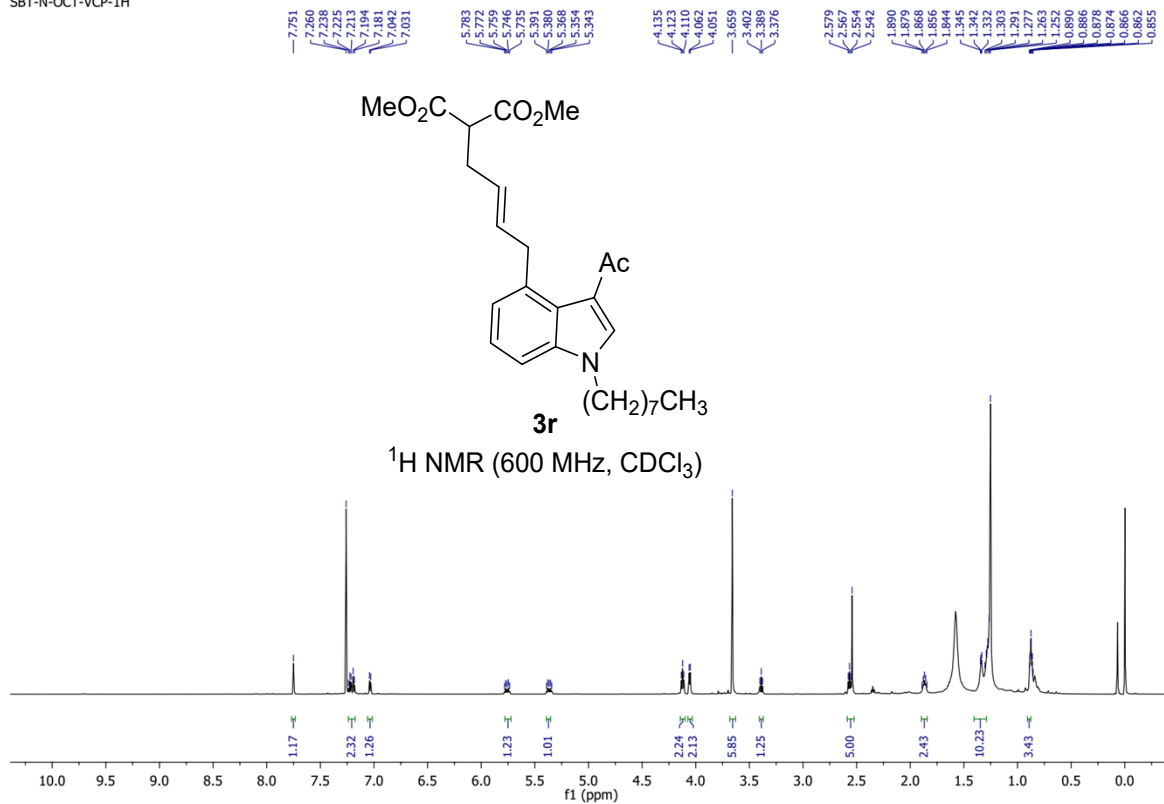

SBT-N-OCT-VCP-13C

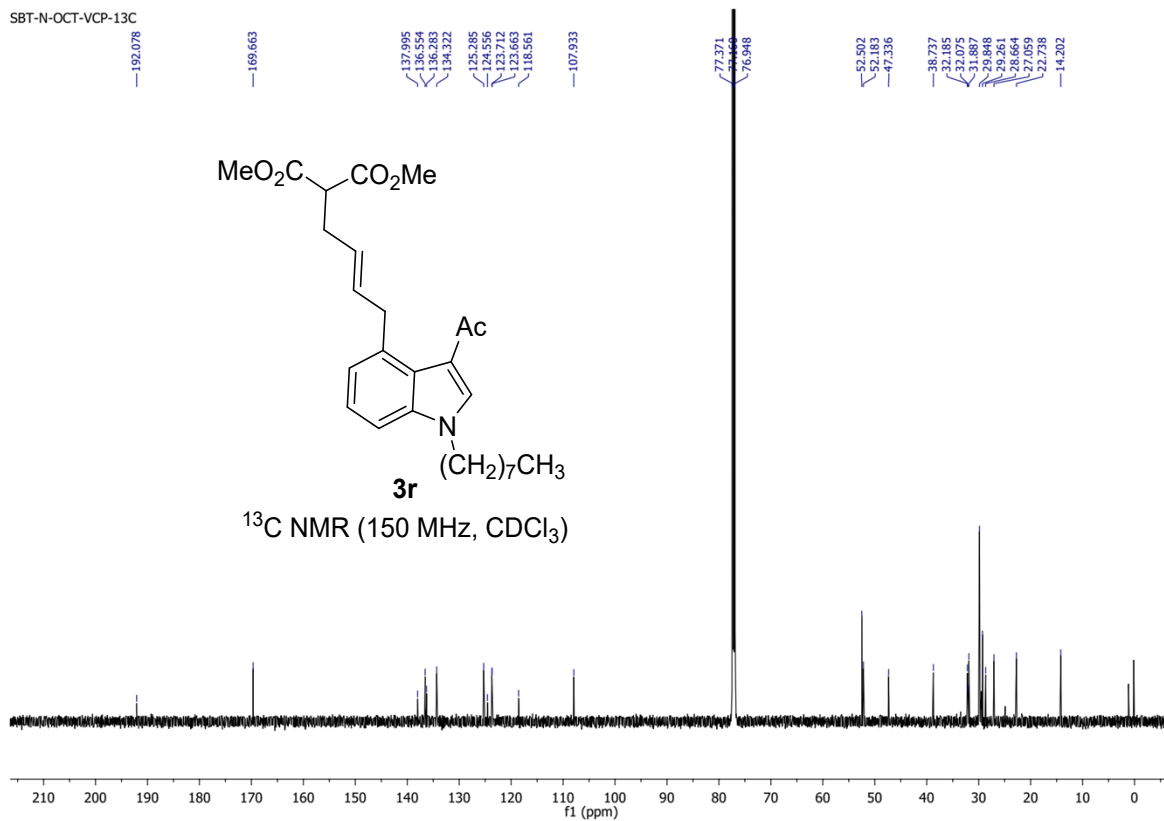

SBT-hexanoyl DG-VCP-1H

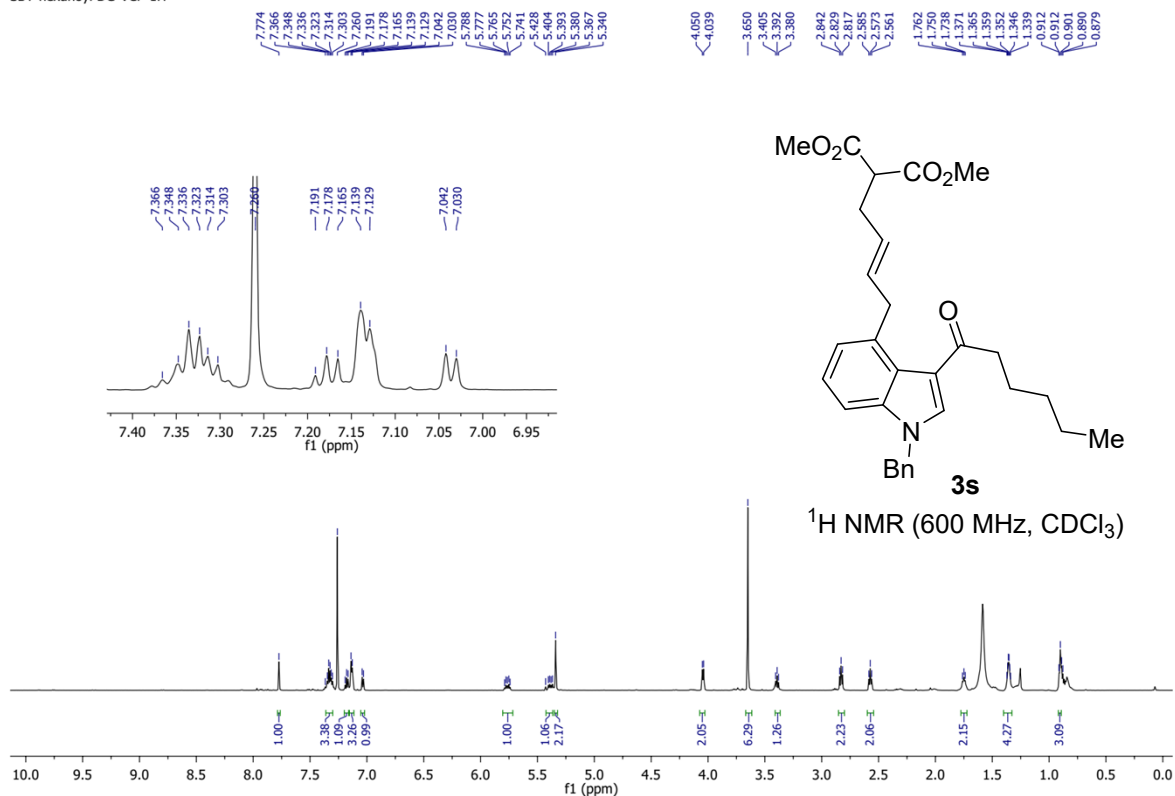

SBT-hexanoyl DG-VCP-13C

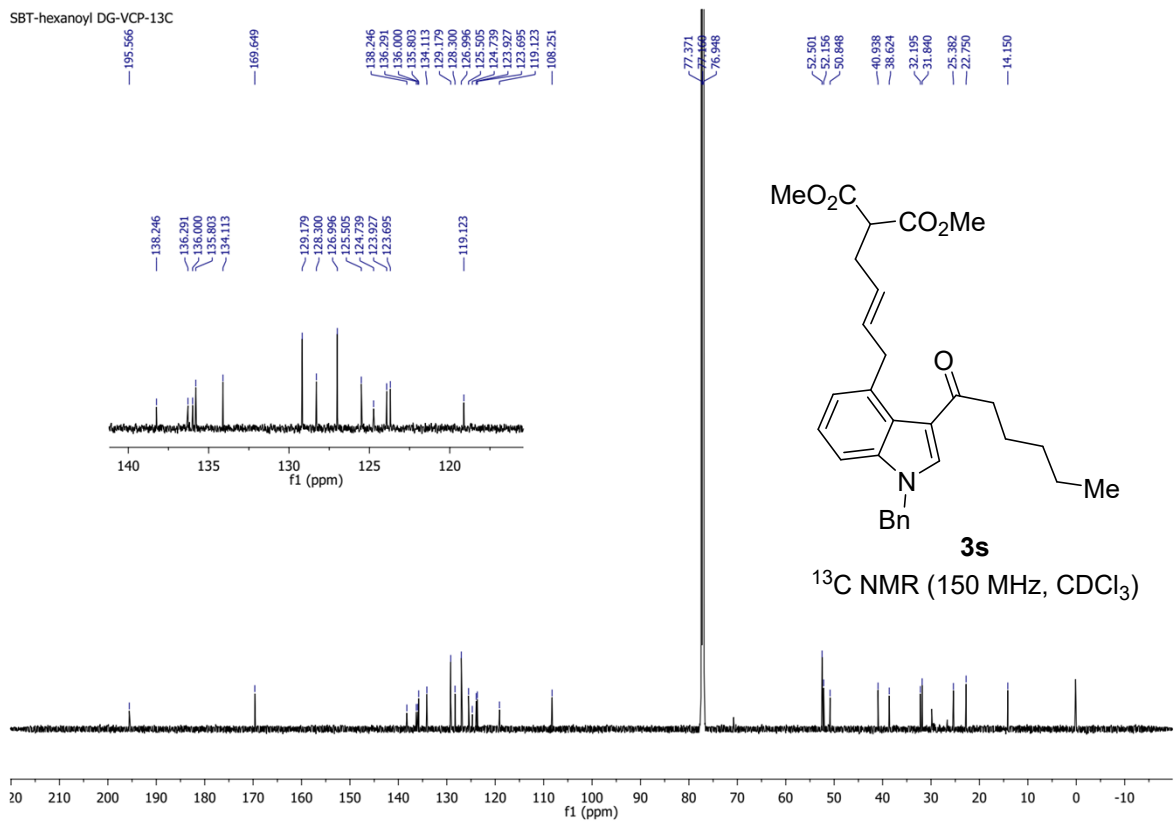

SBT-SESA-VCP-1H

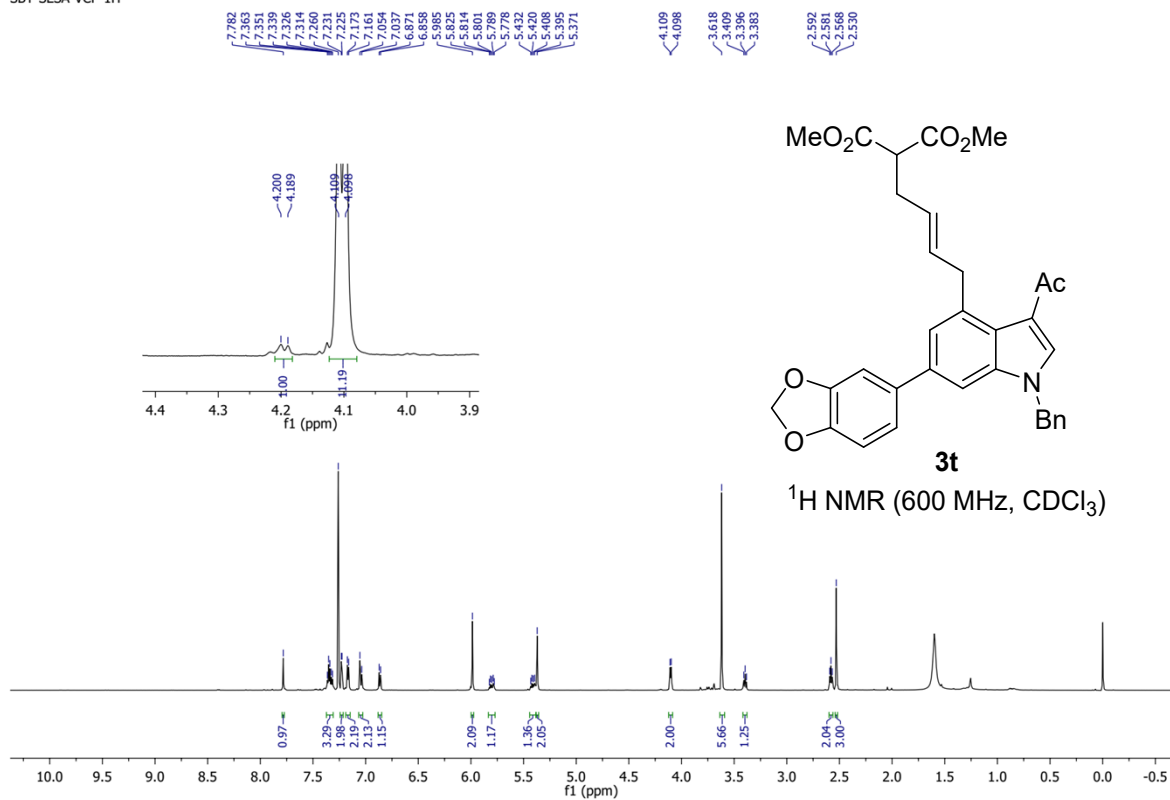

SBT-SESA-VCP-13C

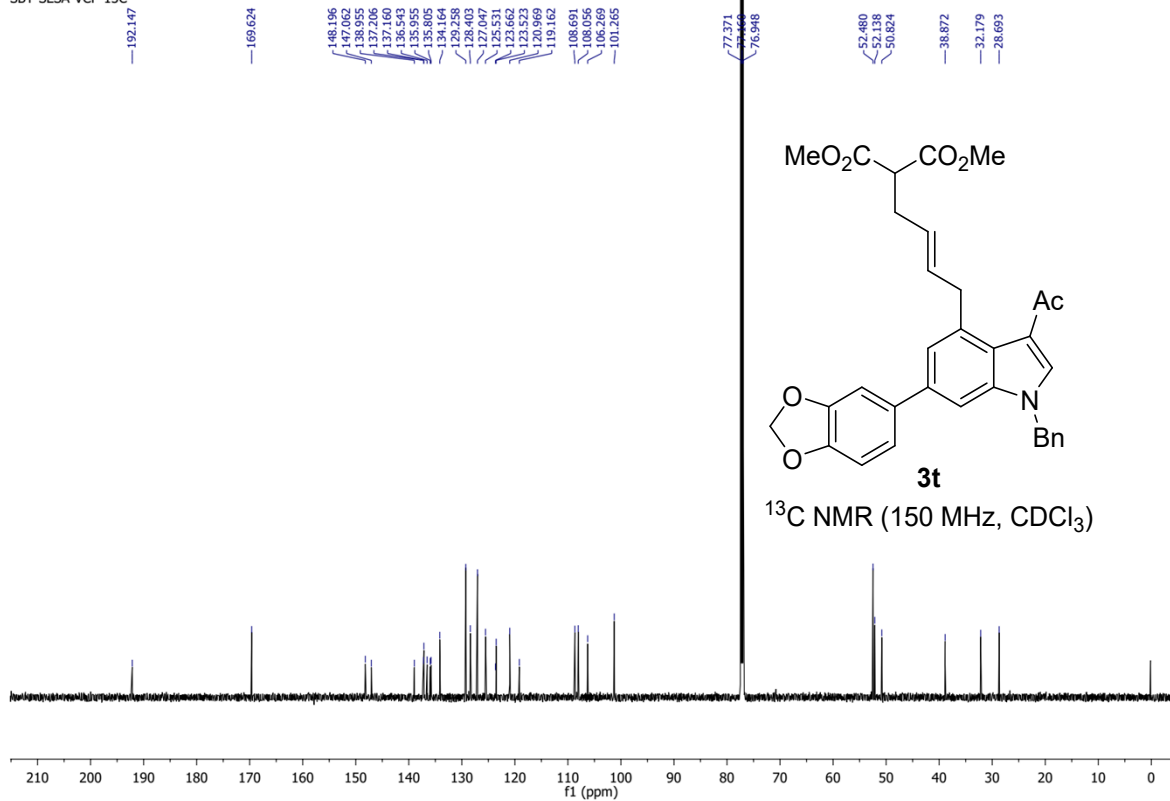

SBT-GEMFI-VCP-1H

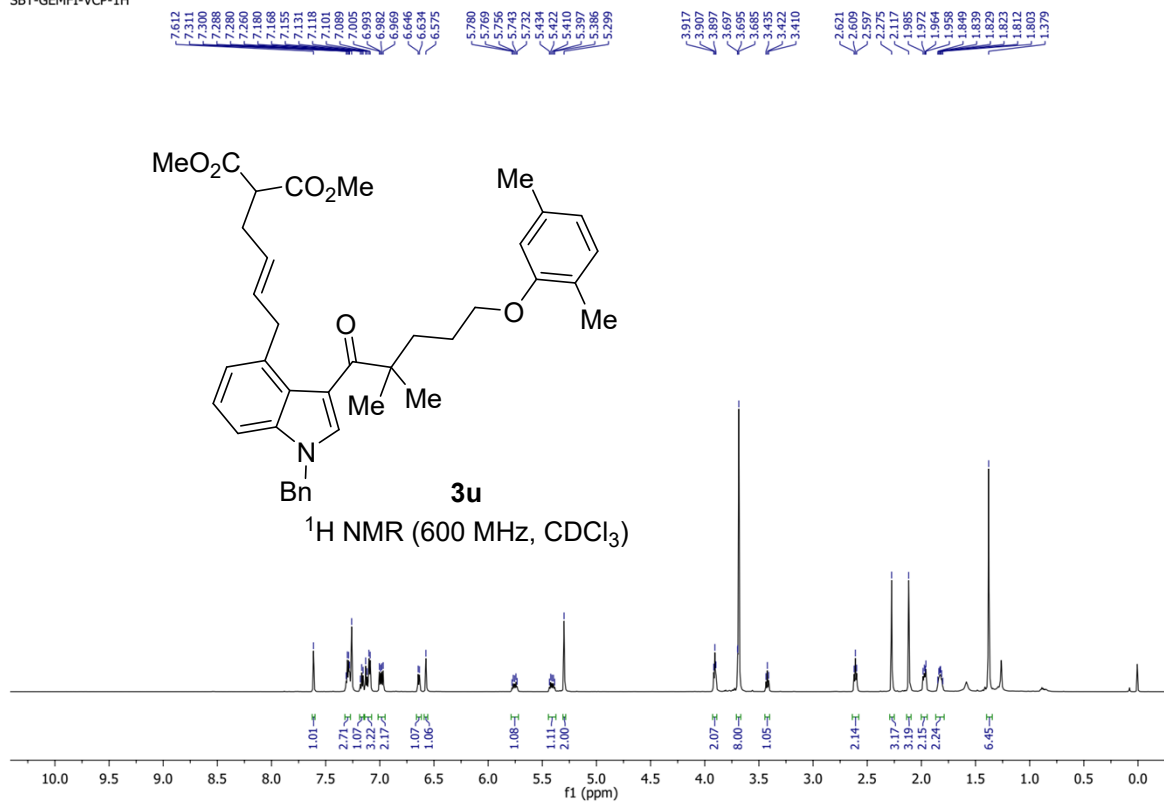

SBT-GEMFI-VCP-13C

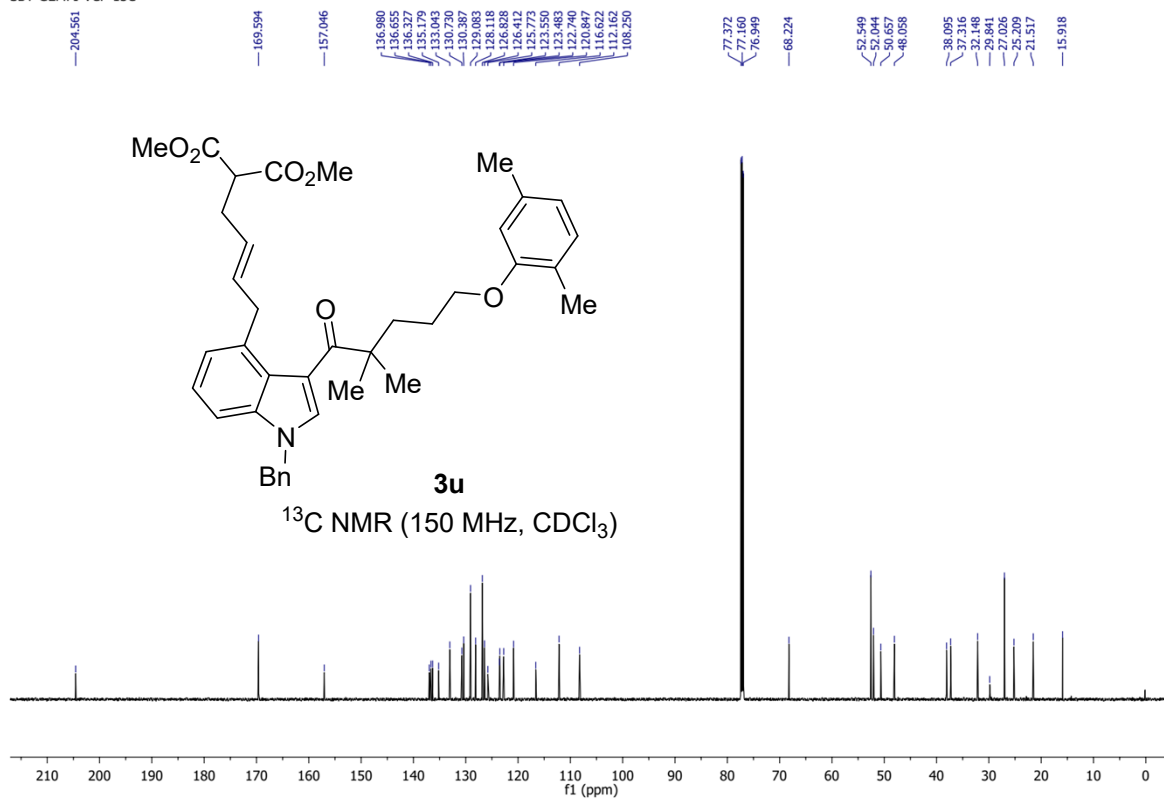

SBT-AC-Bn\_VCP-1H

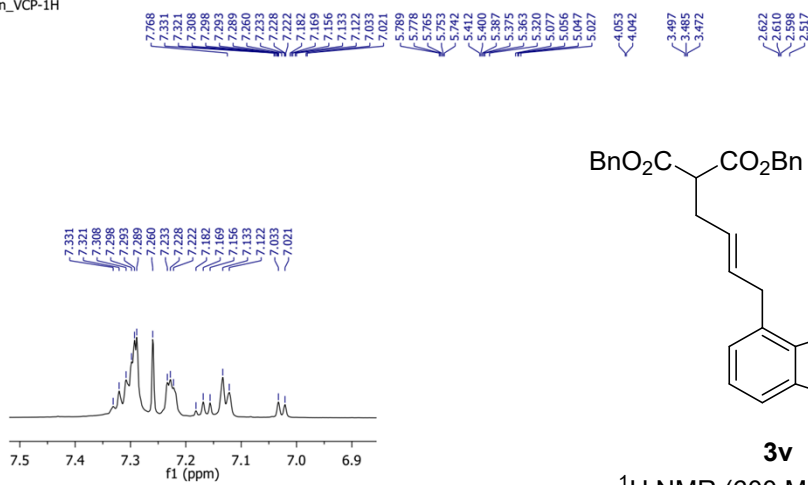

<sup>1</sup>H NMR (600 MHz, CDCl<sub>3</sub>)

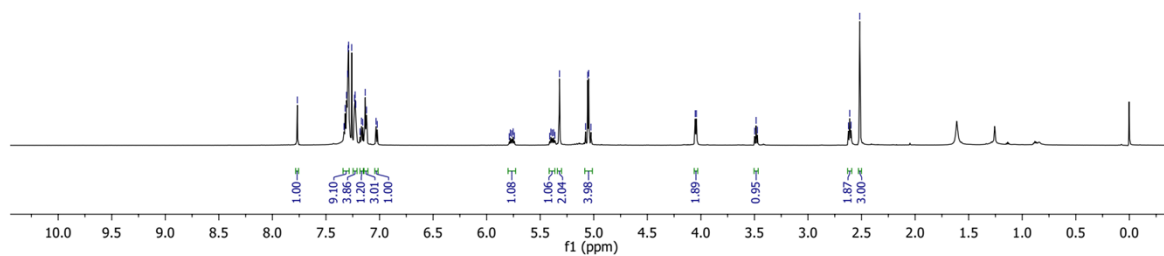

<sup>13</sup>C NMR (150 MHz, CDCl<sub>3</sub>)

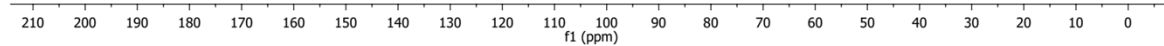



SBT-AC-ET-VCP-1H

7.775  
7.352  
7.340  
7.328  
7.319  
7.298  
7.286  
7.193  
7.180  
7.167  
7.151  
7.139  
7.126  
7.054  
5.789  
5.778  
5.765  
5.753  
5.742  
5.499  
5.397  
5.385  
5.371  
5.360  
5.337  
4.149  
4.137  
4.125  
4.115  
4.104  
4.092  
4.086  
4.082  
3.358  
3.345  
3.333  
2.579  
2.567  
2.555  
2.536  
1.202  
1.190  
1.178

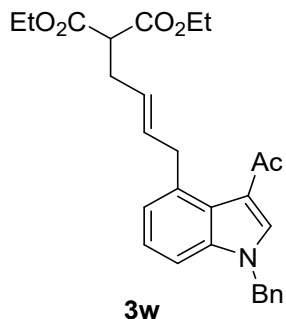

<sup>1</sup>H NMR (600 MHz, CDCl<sub>3</sub>)

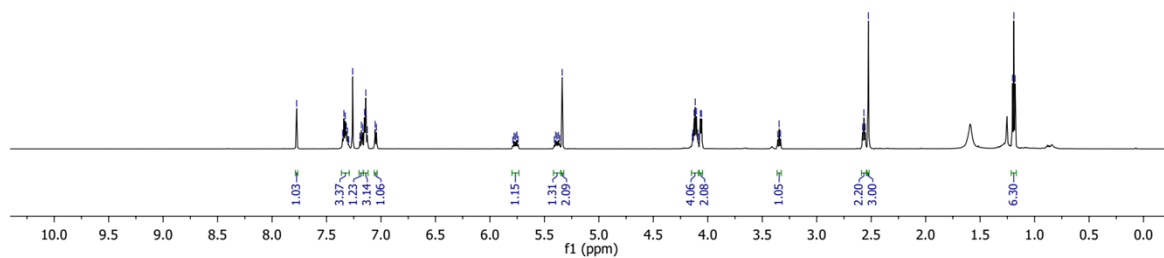

SBT-AC-ET-VCP-13C

192.238  
169.267  
138.308  
136.997  
135.886  
135.886  
133.989  
129.190  
128.333  
127.050  
125.611  
124.603  
123.902  
119.251  
108.248  
77.372  
76.949  
61.373  
52.492  
50.863  
38.704  
32.106  
28.743  
14.173

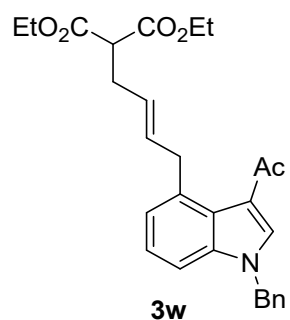

<sup>13</sup>C NMR (150 MHz, CDCl<sub>3</sub>)

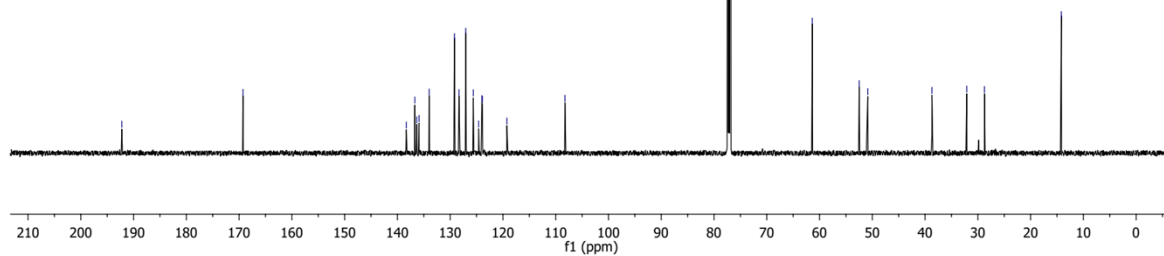

SBT-AC-Di-*i*Pr-VCP-1H

7.782, 7.775, 7.404, 7.391, 7.389, 7.357, 7.355, 7.349, 7.338, 7.335, 7.317, 7.305, 7.280, 7.188, 7.188, 7.175, 7.162, 7.147, 7.134, 7.120, 7.110, 7.100, 7.085, 7.044, 7.044, 6.082, 6.068, 6.056, 6.045, 5.777, 5.776, 5.752, 5.740, 5.729, 5.426, 5.404, 5.392, 5.382, 5.367, 5.355, 5.340, 5.333, 5.079, 5.069, 5.059, 5.049, 5.038, 5.000, 5.000, 4.990, 4.979, 4.969, 4.959, 4.949, 4.188, 4.066, 4.055, 3.400, 3.387, 3.375, 3.286, 3.274, 3.261, 3.261, 3.274, 3.261, 3.261, 2.555, 2.543, 2.526, 2.514, 2.510, 2.395, 2.383, 2.371, 2.359, 2.138, 2.126, 2.110, 2.101, 2.101, 1.252, 1.247, 1.240, 1.237, 1.229, 1.174, 1.174, 1.165, 1.154

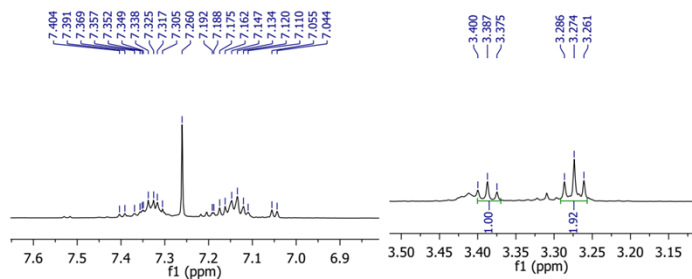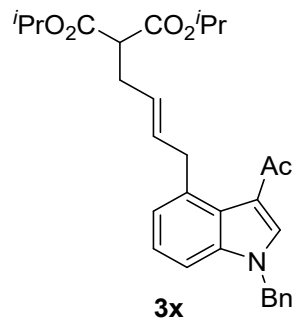

<sup>1</sup>H NMR (600 MHz, CDCl<sub>3</sub>)

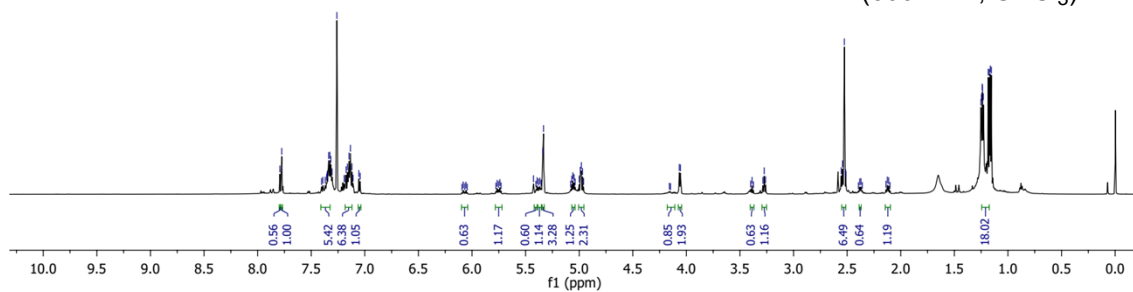

SBT-AC-Di-*i*Pr-VCP-13C

192.320, 192.278, 169.304, 168.814, 138.415, 138.380, 138.056, 136.666, 136.340, 135.911, 135.882, 135.911, 133.831, 133.831, 133.728, 132.986, 129.946, 129.360, 129.179, 128.320, 127.059, 126.946, 126.946, 124.607, 124.036, 124.006, 123.662, 120.383, 120.383, 119.265, 108.968, 108.225, 77.371, 77.371, 76.948, 68.815, 68.780, 52.824, 52.824, 50.882, 50.882, 38.674, 31.967, 31.054, 28.750, 28.721, 21.804, 21.767, 21.676, 21.679

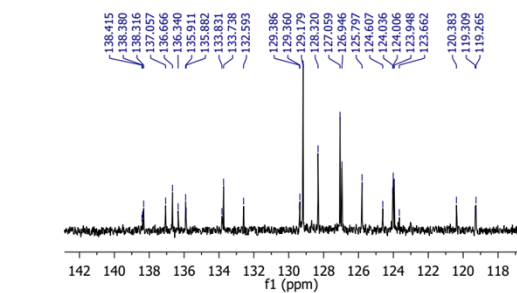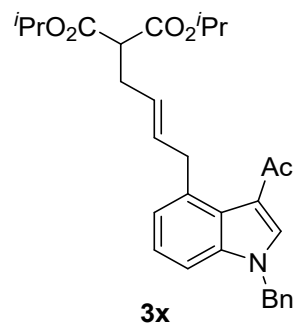

<sup>13</sup>C NMR (150 MHz, CDCl<sub>3</sub>)

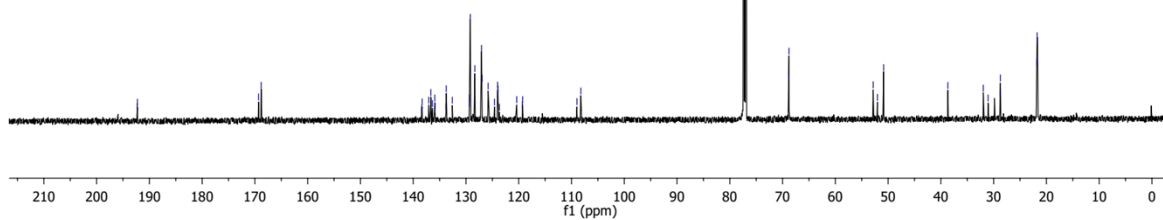

SBT-AC-Di-isoamyl-VCP-1H

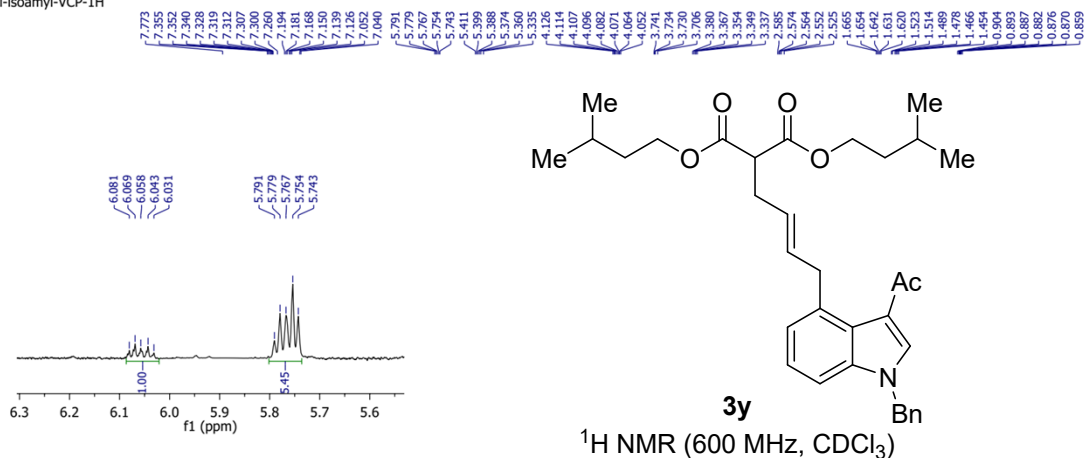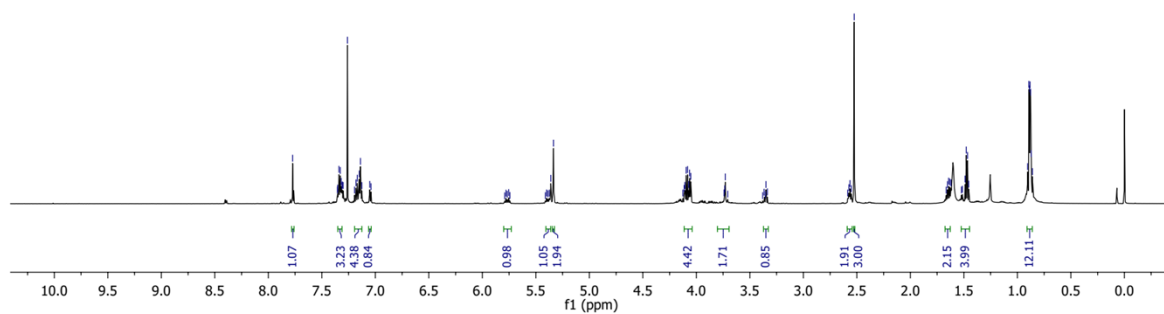

SBT-AC-Di-isoamyl-VCP-13C

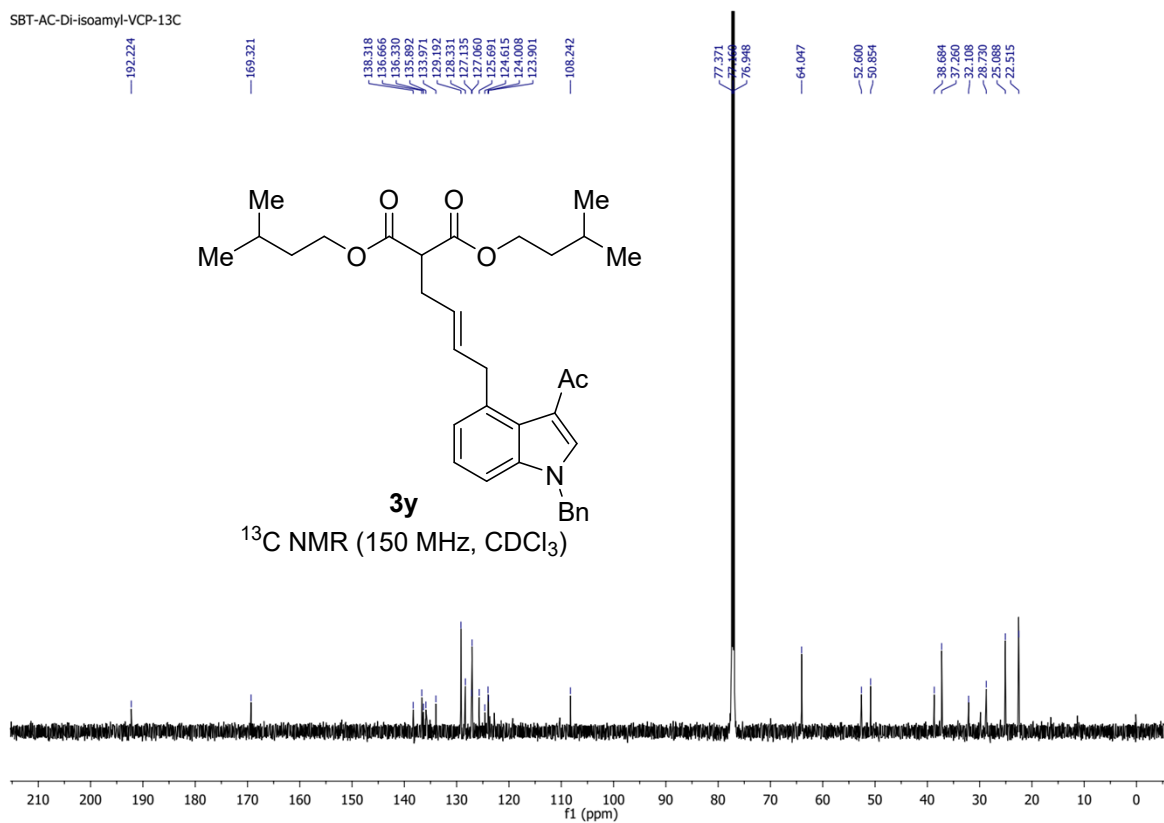

SBT-AC-Di-SO2Ph-VCP-1H

7.911, 7.892, 7.889, 7.811, 7.648, 7.645, 7.641, 7.631, 7.626, 7.622, 7.610, 7.607, 7.595, 7.576, 7.551, 7.490, 7.471, 7.344, 7.330, 7.317, 7.316, 7.282, 7.260, 7.202, 7.185, 7.179, 7.175, 7.158, 7.141, 7.110, 7.007, 6.994, 6.990, 5.627, 5.626, 5.598, 5.572, 5.353, 5.335, 5.317, 5.296, 5.280, 4.426, 4.410, 4.395, 4.015, 3.999, 2.823, 2.807, 2.791, 2.530

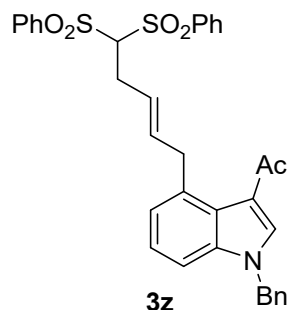

<sup>1</sup>H NMR (400 MHz, CDCl<sub>3</sub>)

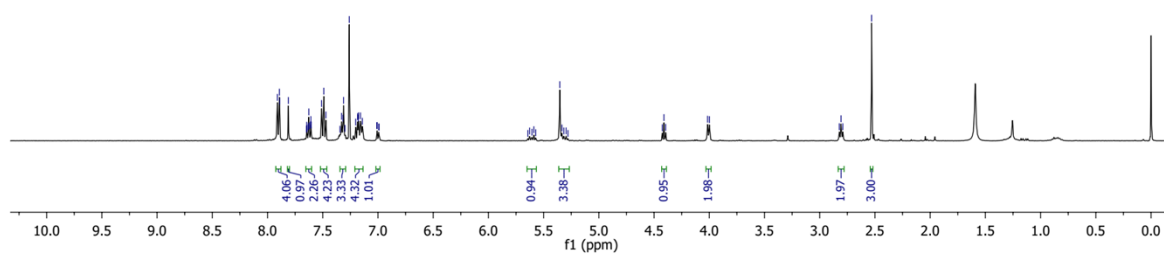

SBT-AC-Di-SO2Ph-VCP-13C

192.211, 138.373, 138.129, 137.926, 135.854, 135.854, 135.817, 135.621, 134.574, 129.865, 129.221, 129.183, 128.381, 127.043, 124.642, 124.253, 124.061, 123.497, 123.472, 108.486, 84.259, 77.371, 77.044, 76.946, 50.937, 38.727, 29.899, 29.674, 28.761

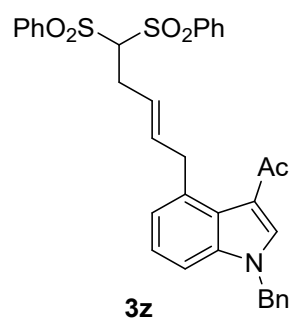

<sup>13</sup>C NMR (150 MHz, CDCl<sub>3</sub>)

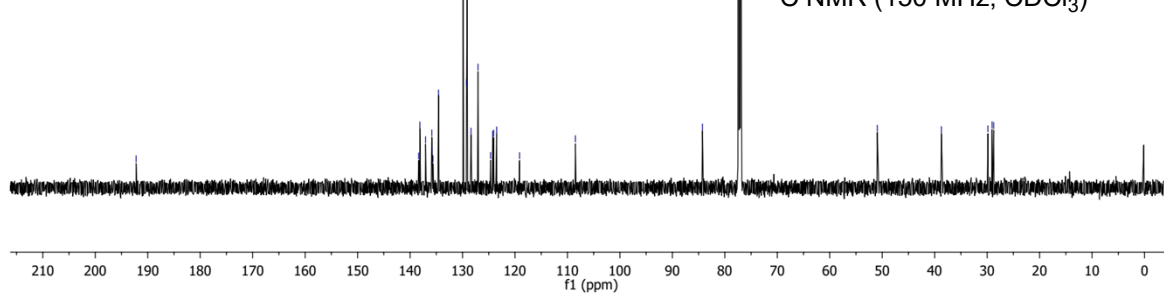

SBT-AC-EAA-VCP-1H

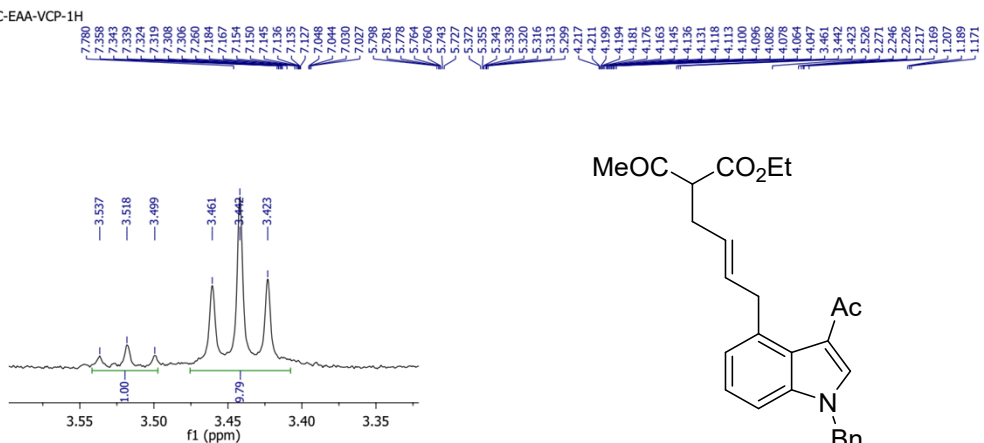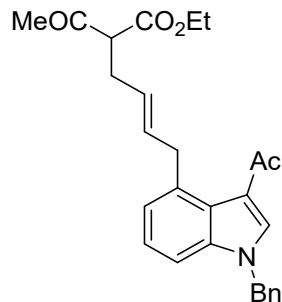

**3ad**

<sup>1</sup>H NMR (400 MHz, CDCl<sub>3</sub>)

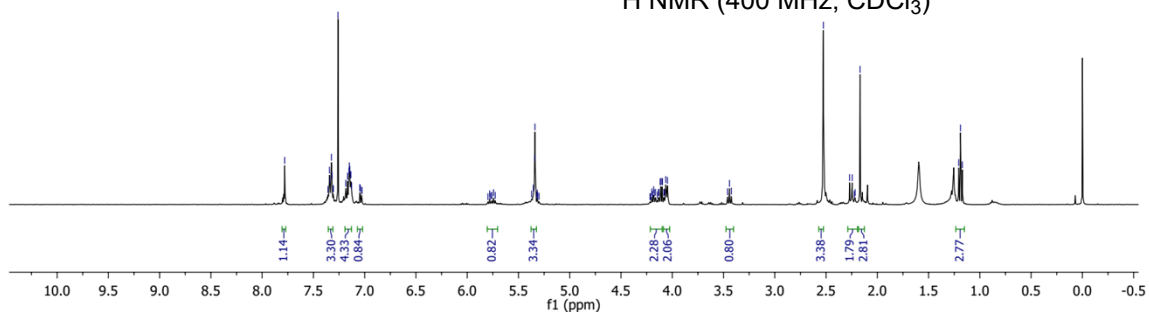

SBT-AC-EAA-VCP-13C

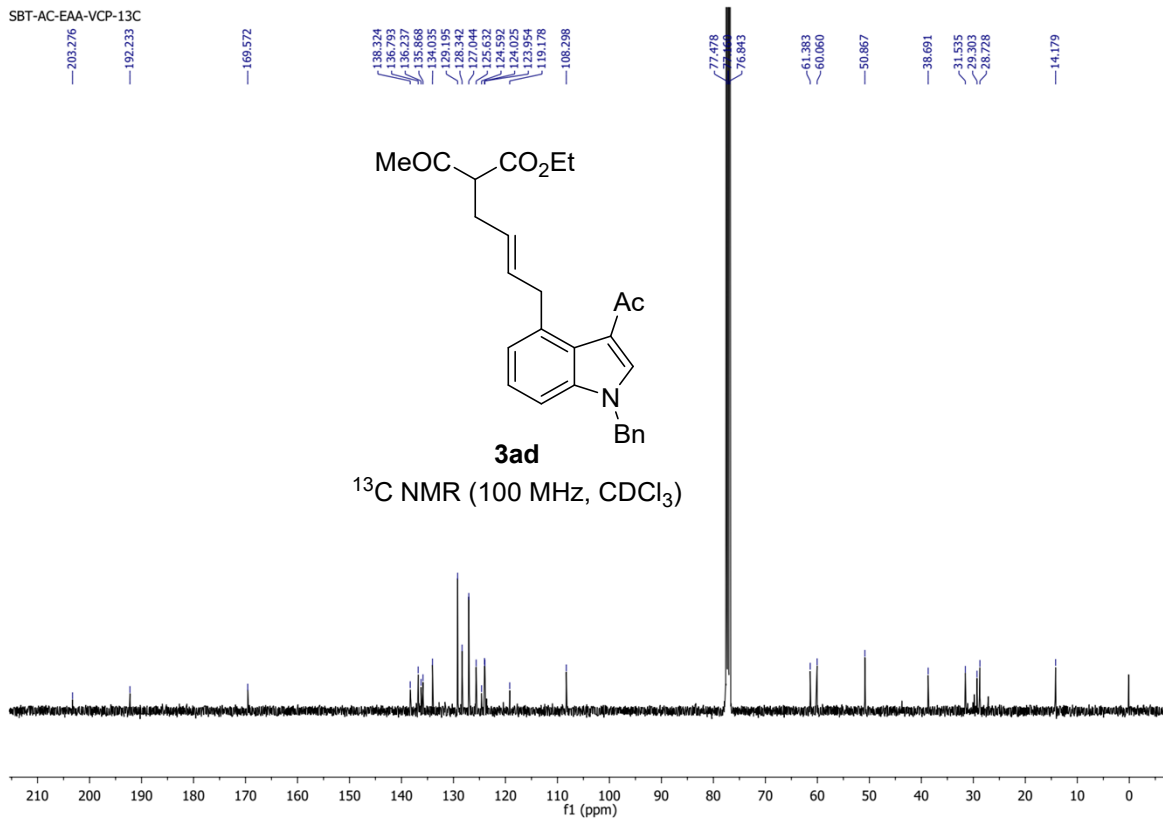

**3ad**  
<sup>13</sup>C NMR (100 MHz, CDCl<sub>3</sub>)

SBT-AC-CO2Me\_vit E-VCP-1H

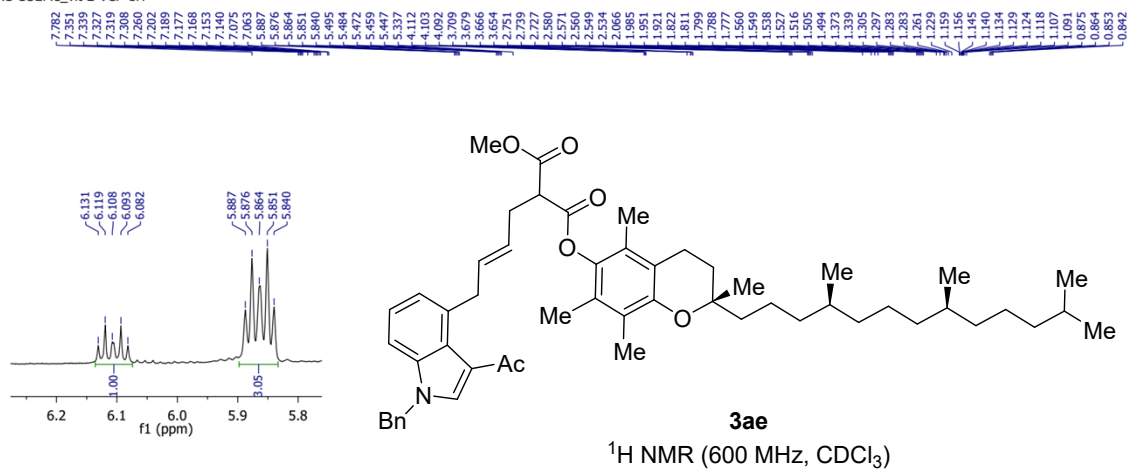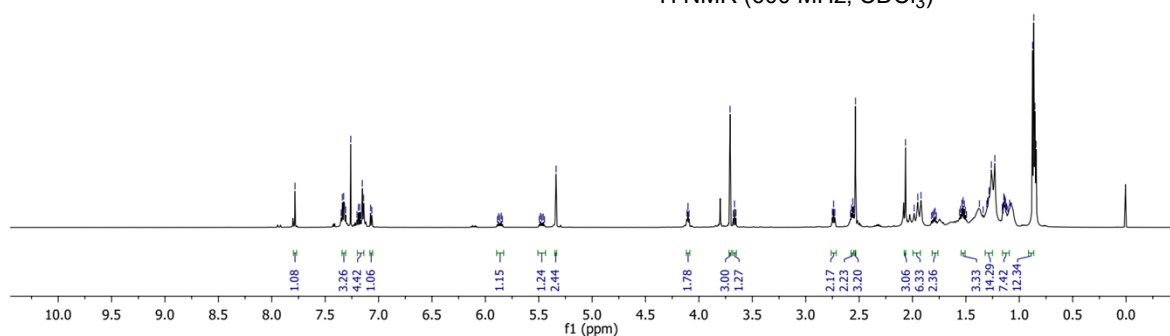

SBT-AC-CO2Me\_vit E-VCP-13C

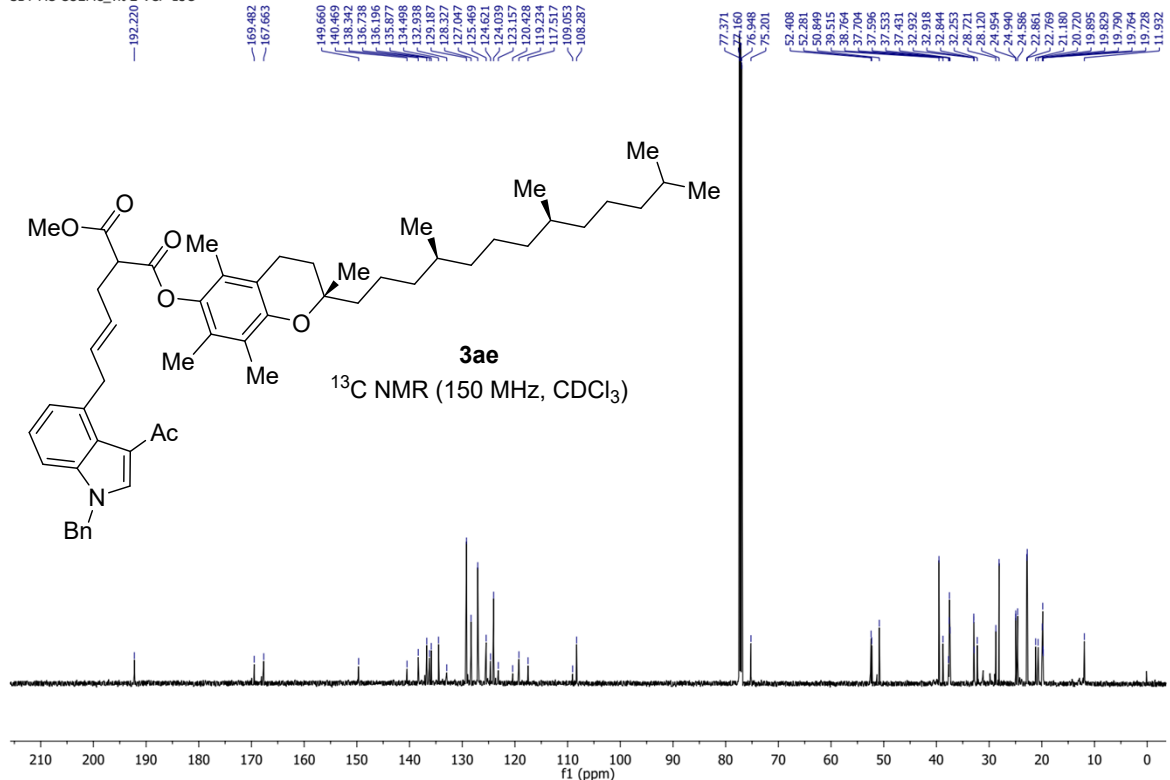

SBT-AC-VAZ-1H

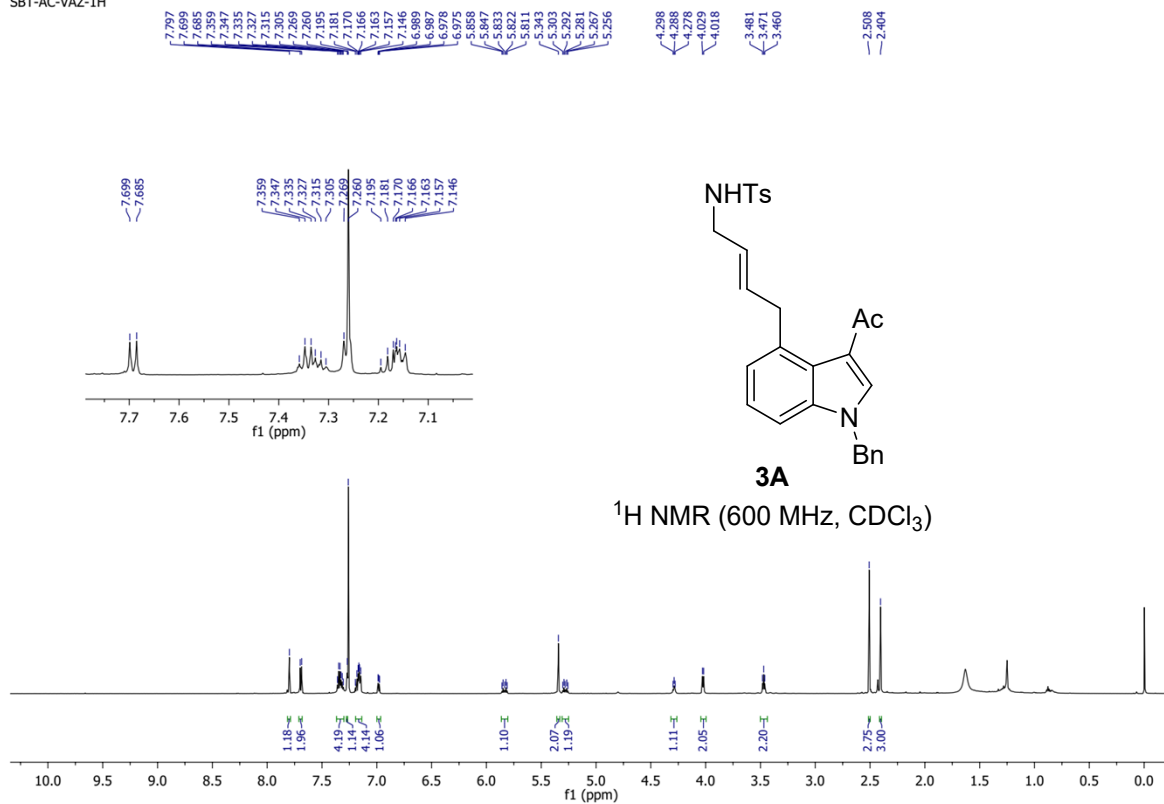

SBT-AC-VAZ-13C

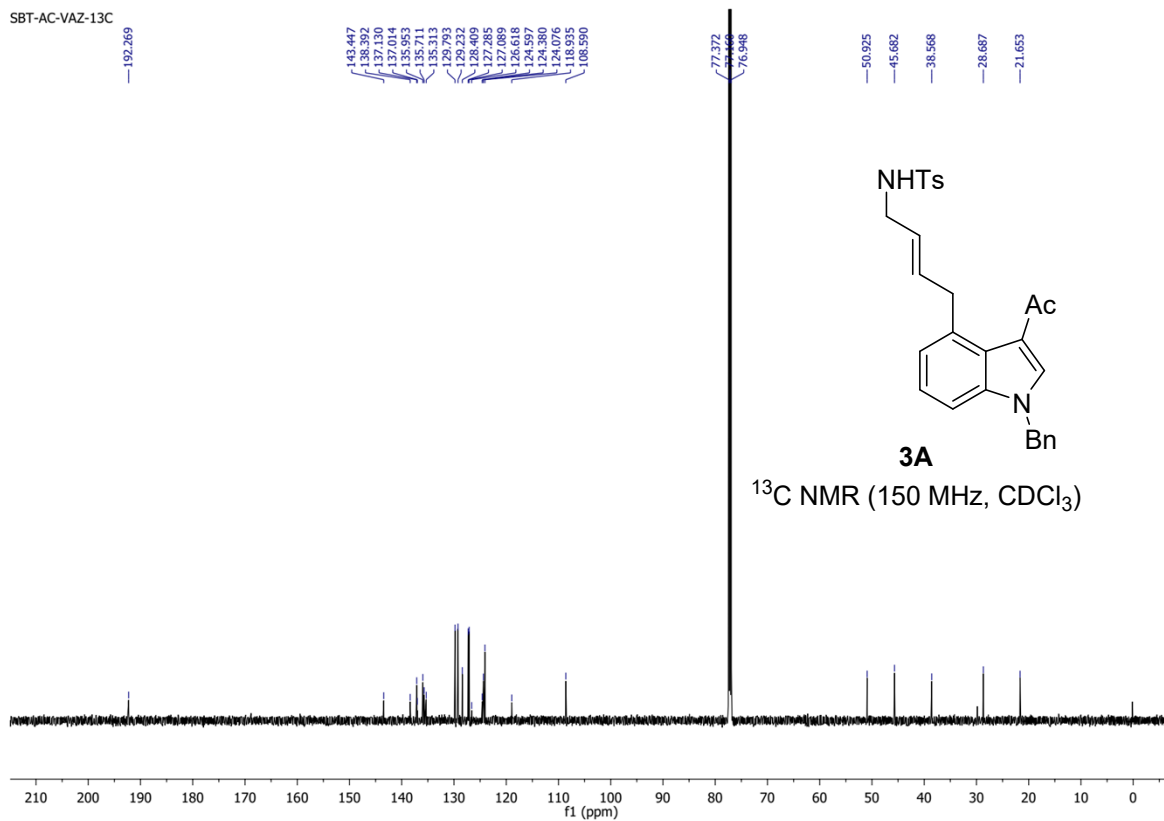

SBT-PIV DG-VCP-1H

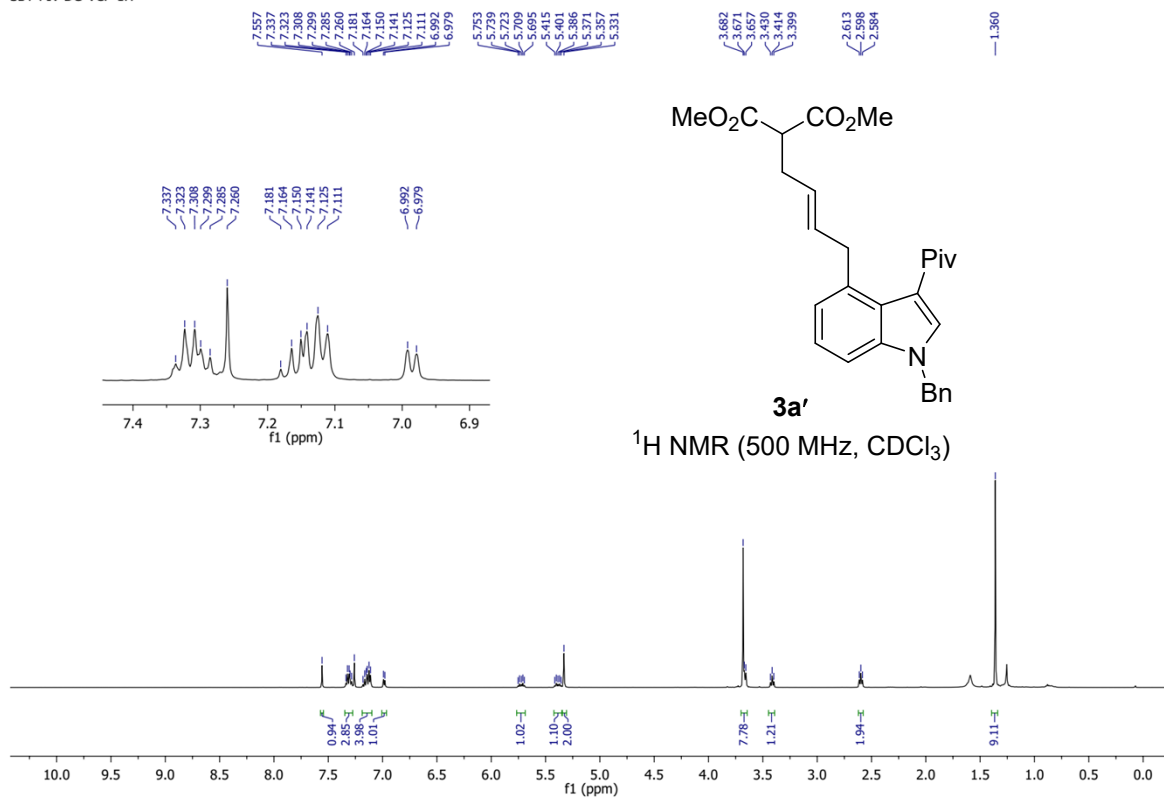

SBT-PIV DG-VCP-13C

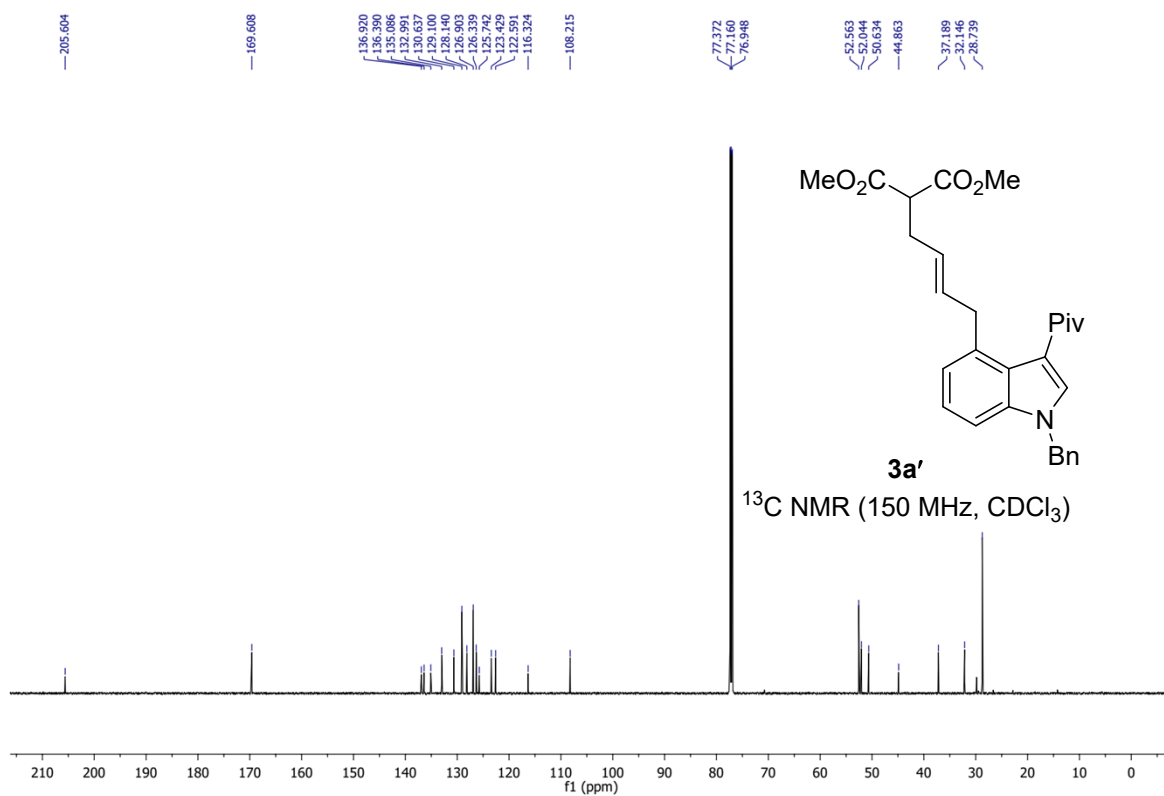



SBT-CHO DG-VCP-1H

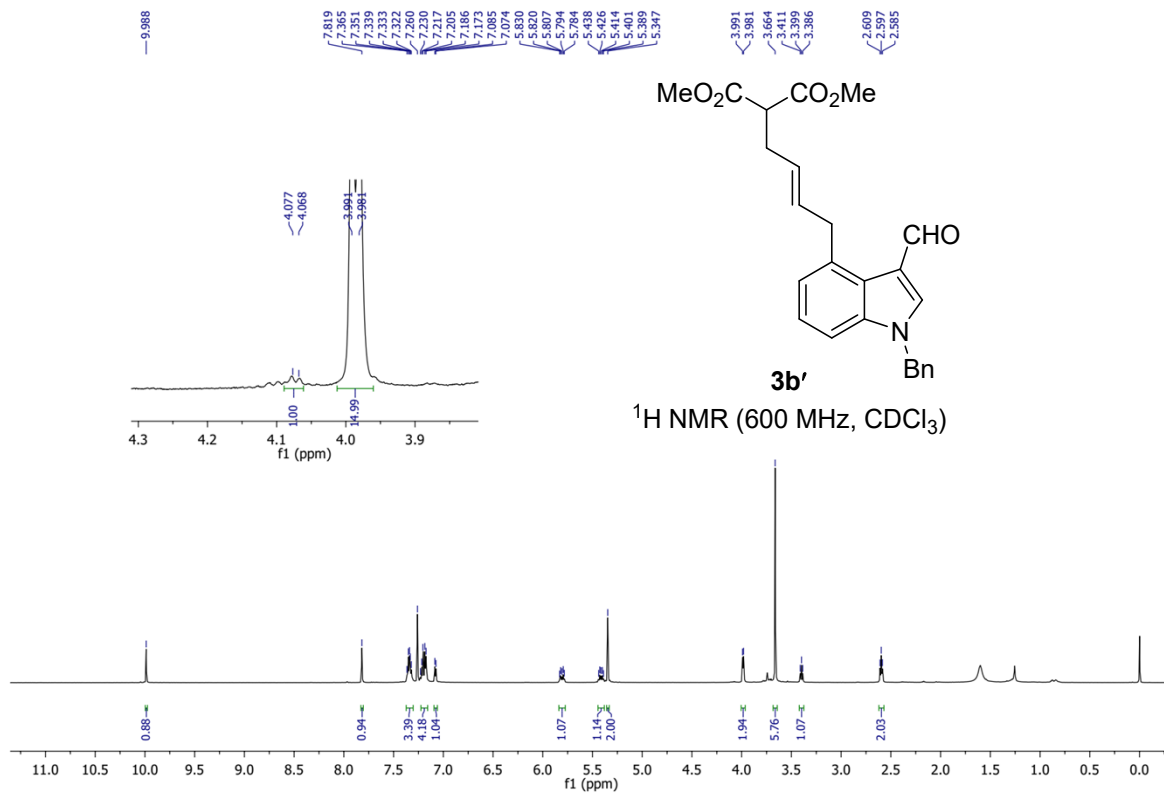

SBT-CHO DG-VCP-13C

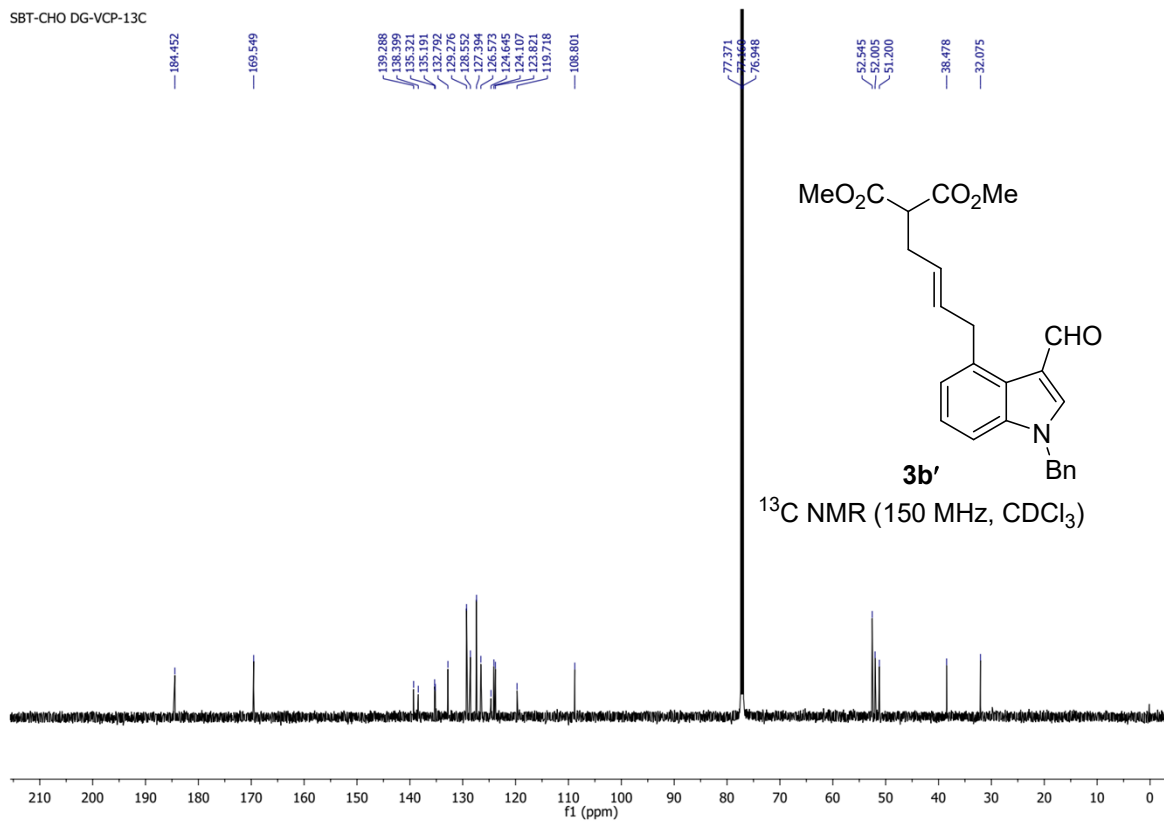

SBT-THIA-AC-VCP-1H

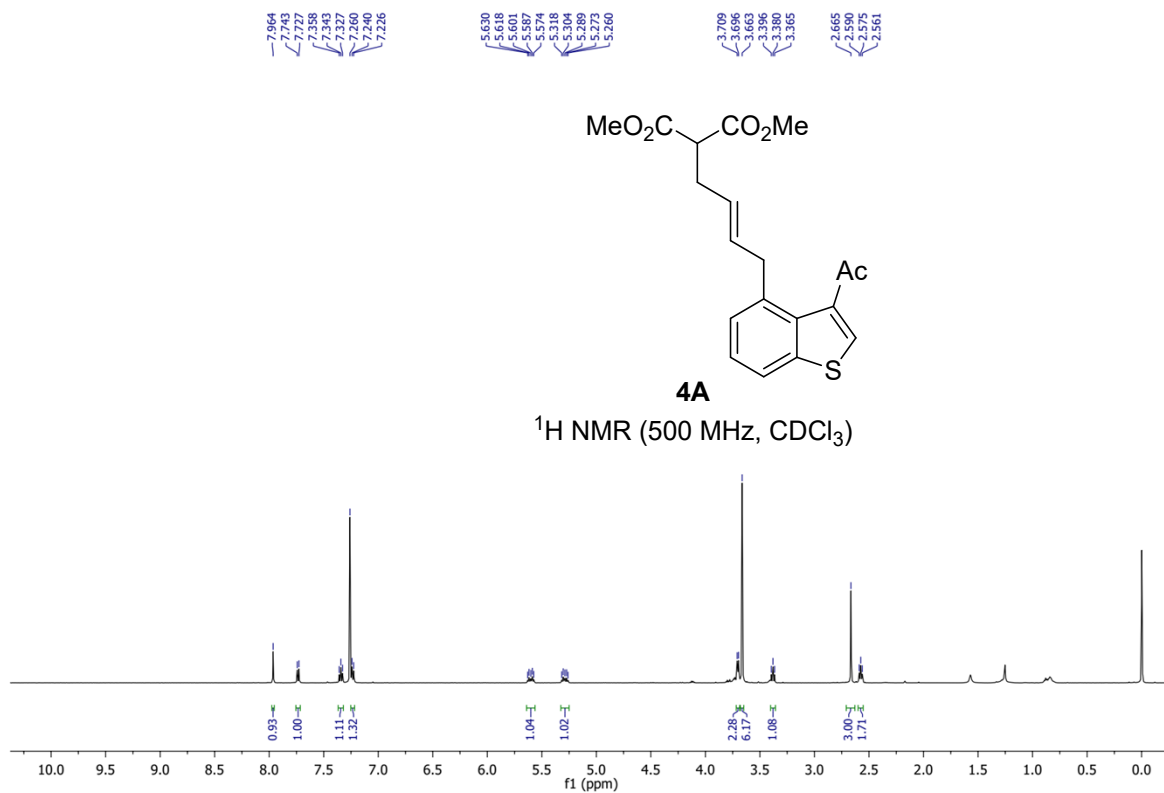

SBT-THIA-AC-VCP-13C

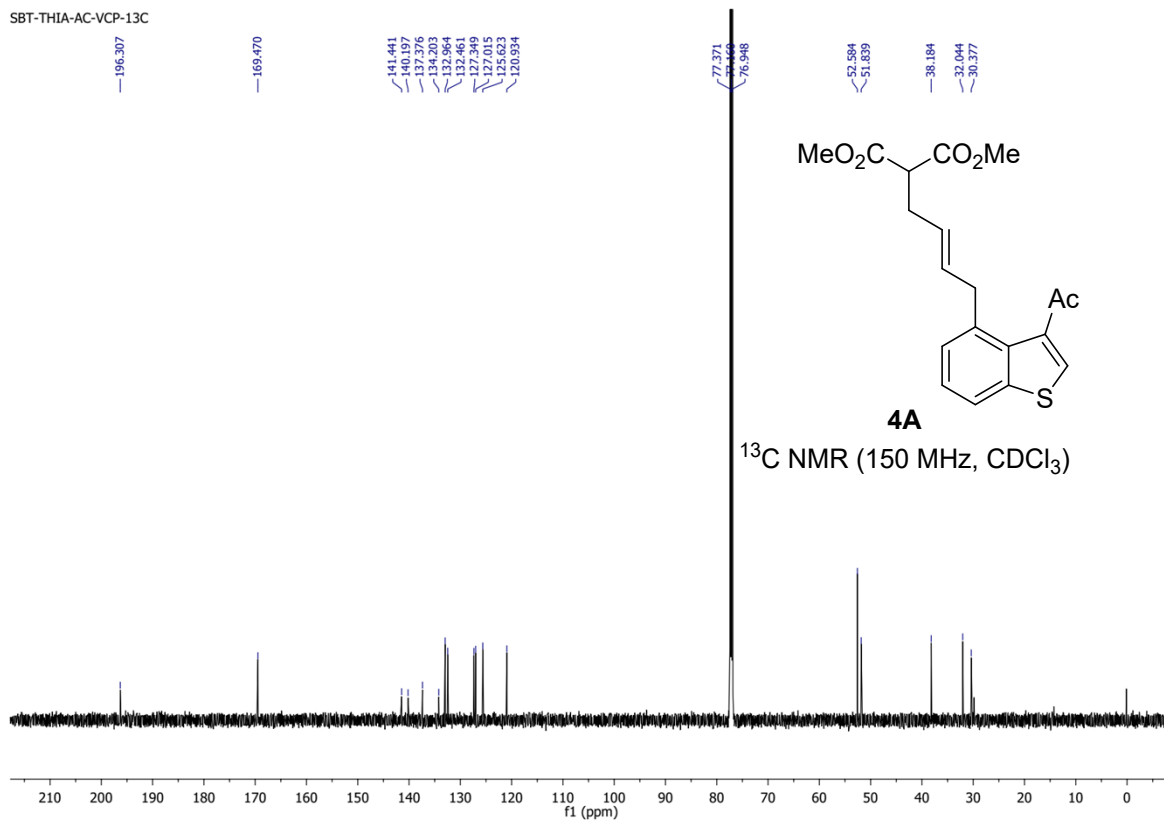

SBT-N-AC DG-VCP-1H

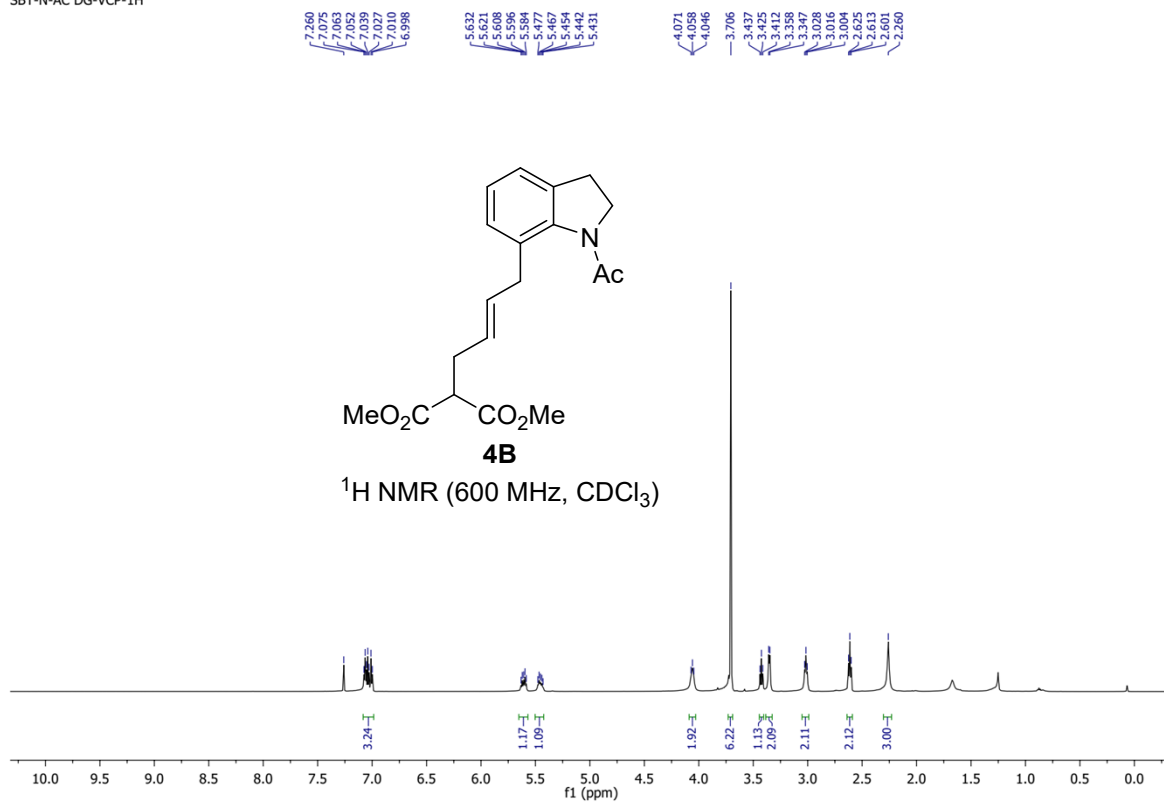

SBT-N-AC DG-VCP-13C

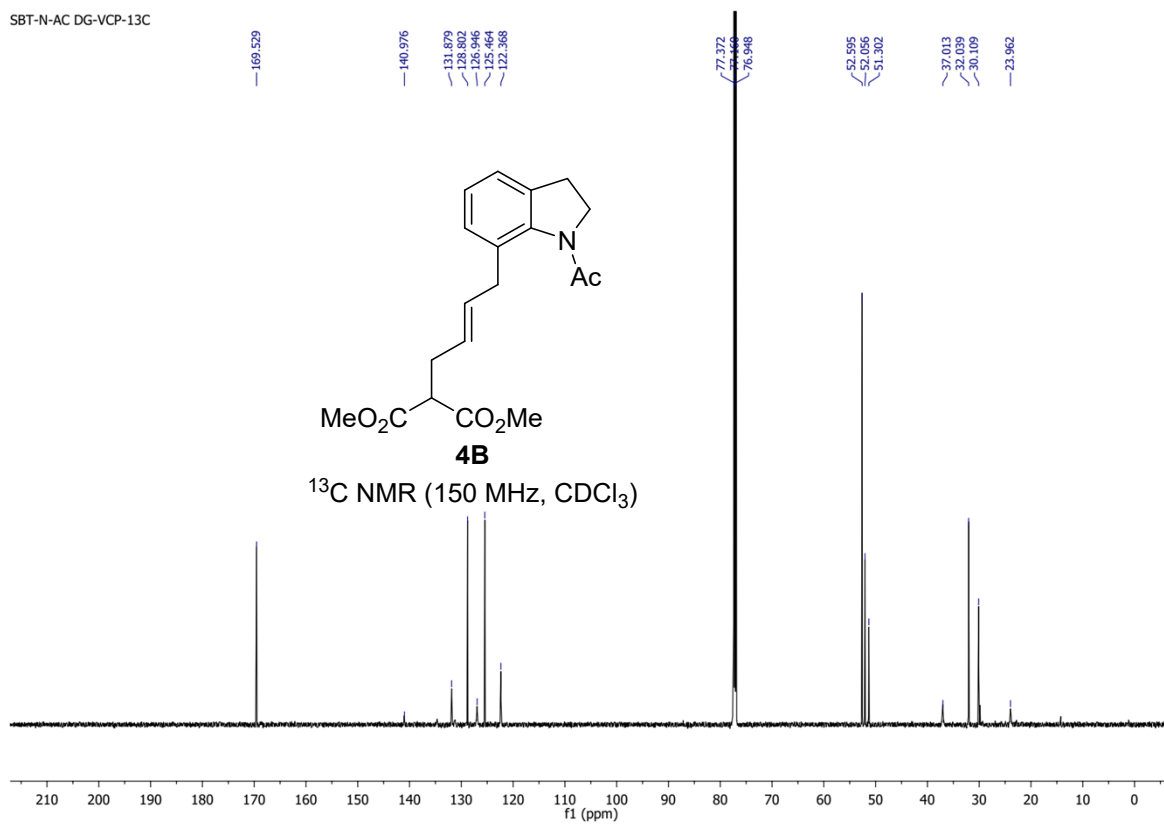

SBT-THQ-AC DG-VCP-1H

7.260  
7.170  
7.158  
7.145  
7.112  
7.098  
7.087  
7.068  
7.056  
7.039  
7.004  
5.589  
5.579  
5.570  
5.564  
5.553  
5.552  
5.542  
5.479  
5.468  
5.442  
5.430  
4.810  
4.801  
4.795  
4.789  
4.786  
4.780  
4.773  
4.764  
3.740  
3.735  
3.714  
3.706  
3.708  
3.703  
3.436  
3.434  
3.424  
3.411  
3.405  
3.363  
3.347  
3.337  
3.210  
3.198  
3.184  
3.172

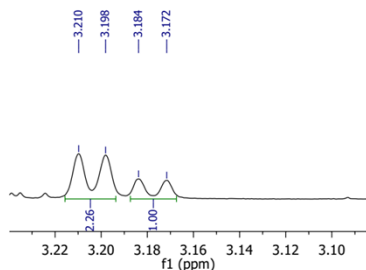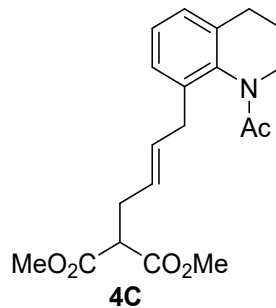

<sup>1</sup>H NMR (600 MHz, CDCl<sub>3</sub>)

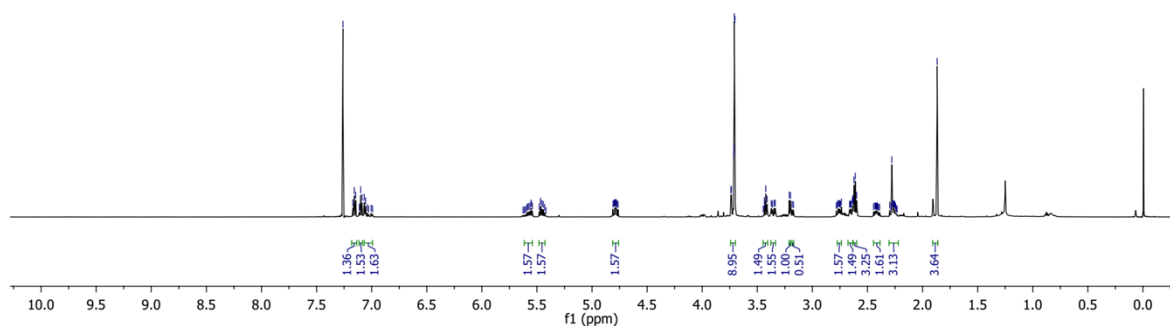

SBT-THQ-AC DG-VCP-13C

171.132  
171.105  
169.430  
169.405  
139.509  
137.783  
135.604  
132.182  
131.770  
130.529  
128.125  
127.769  
127.413  
127.034  
126.982  
126.598  
126.449  
126.237  
125.881  
122.991  
77.372  
76.948  
52.655  
52.632  
52.606  
51.856  
46.413  
34.543  
34.049  
32.063  
31.924  
26.676  
26.653  
24.758  
22.687  
21.624

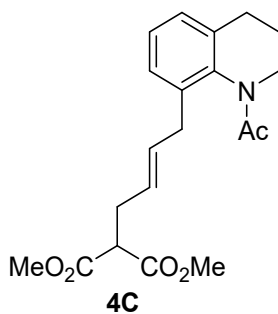

<sup>13</sup>C NMR (150 MHz, CDCl<sub>3</sub>)

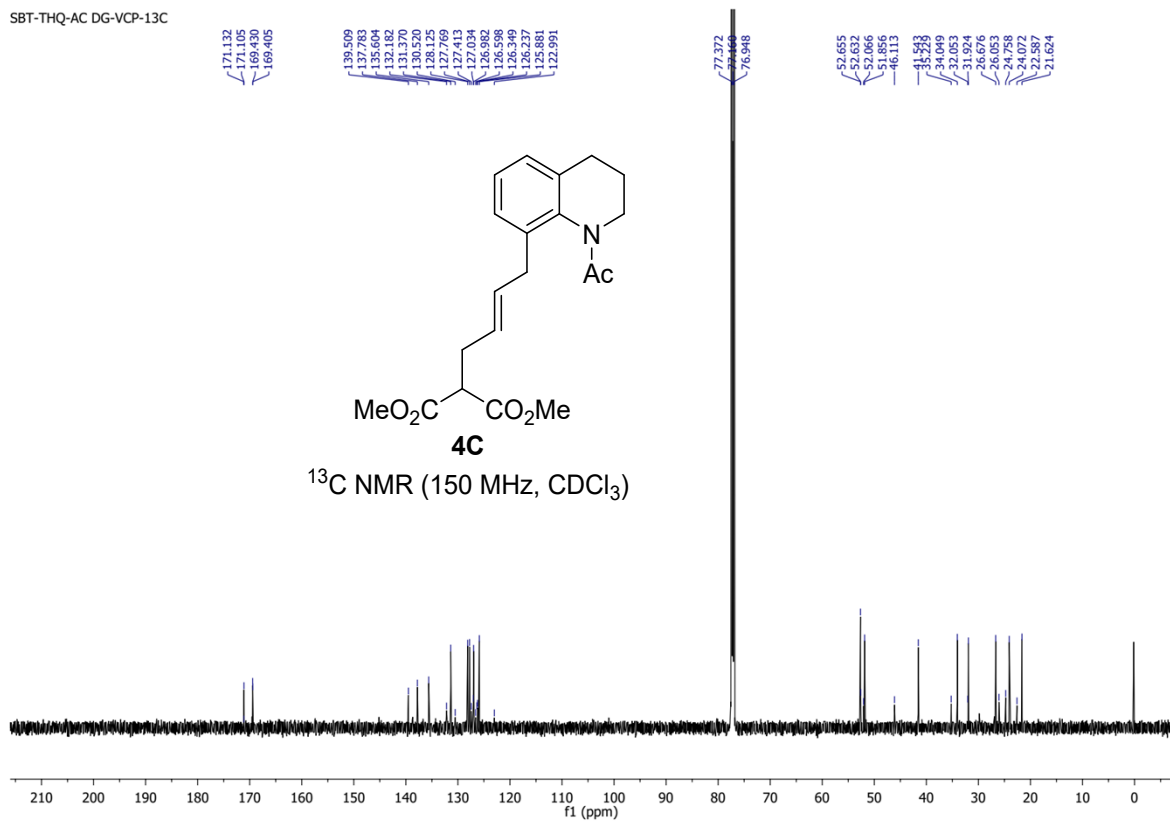

SBT-TETRA-VCP-1H

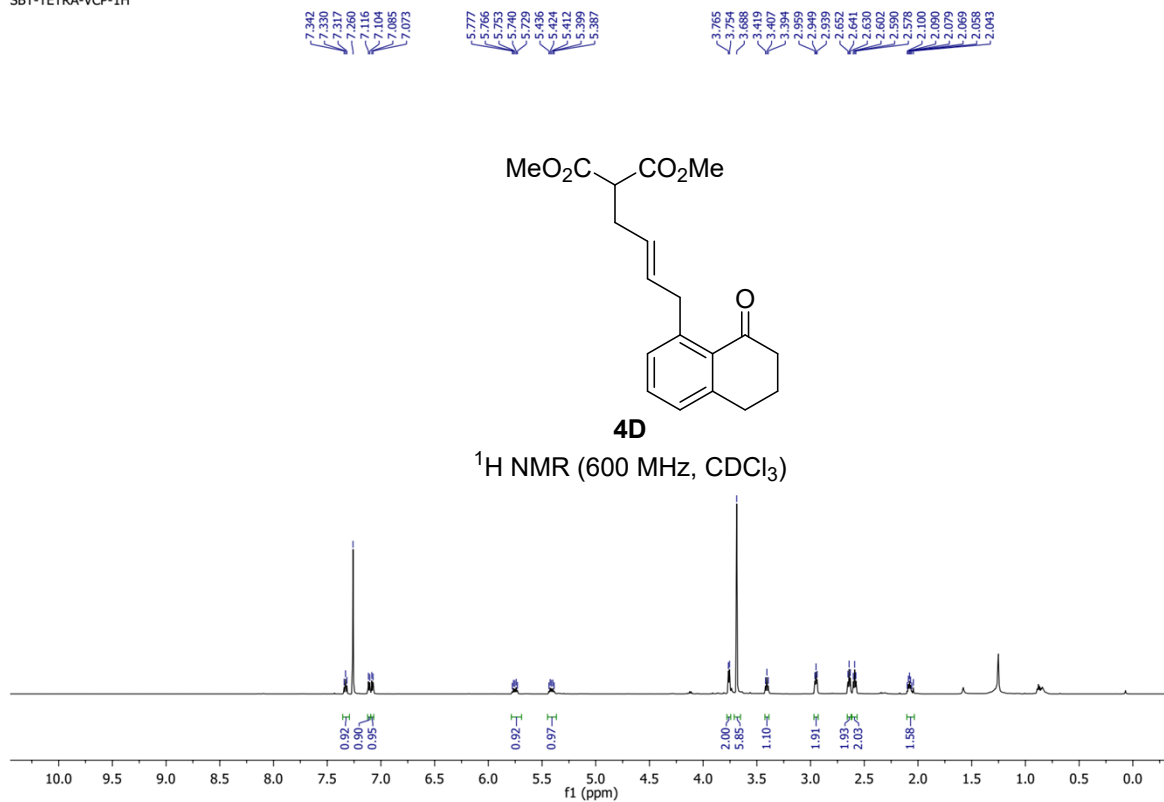

SBT-TETRA-VCP-13C

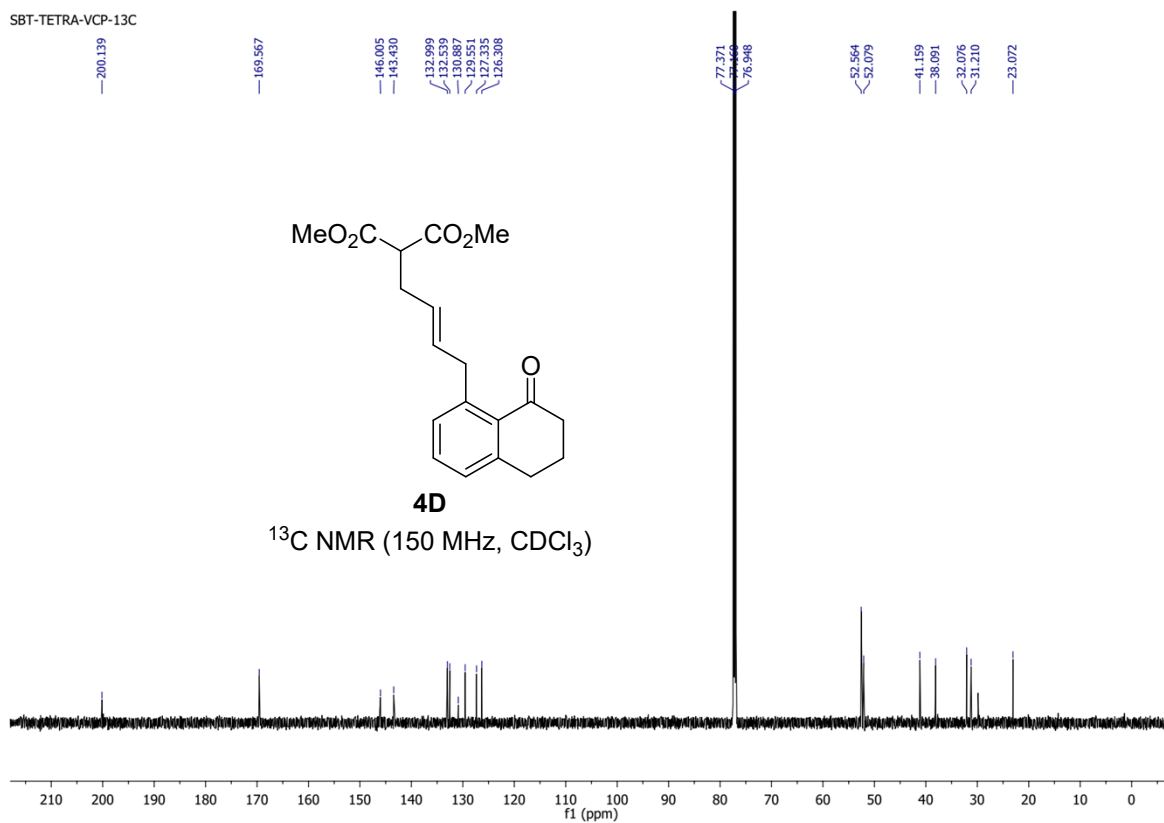

SBT-CARBA DG-VCP-1H

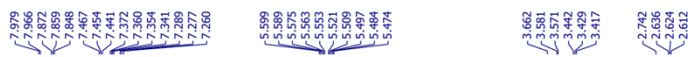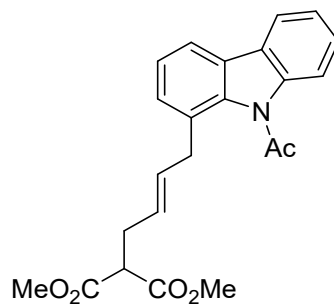

**4E**

<sup>1</sup>H NMR (600 MHz, CDCl<sub>3</sub>)

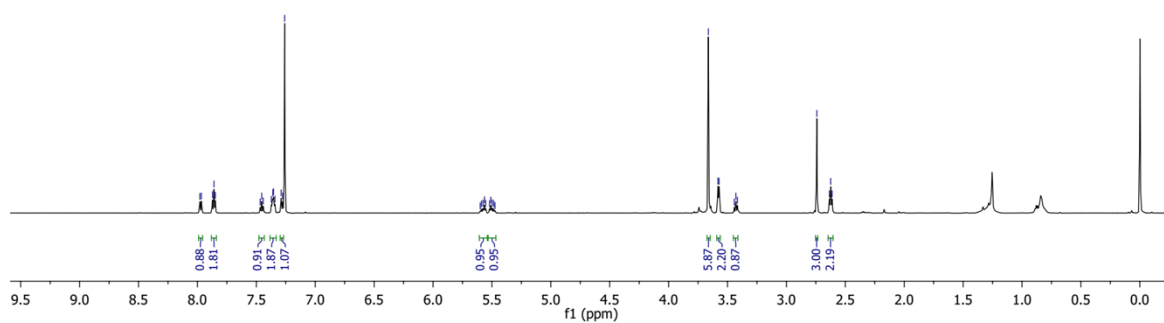

SBT-CARBA DG-VCP-13C

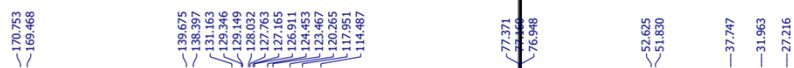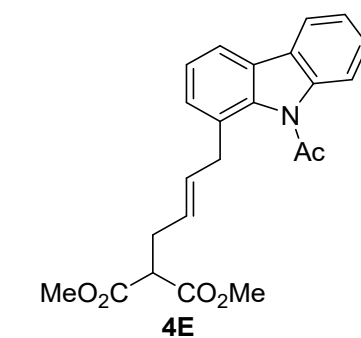

<sup>13</sup>C NMR (150 MHz, CDCl<sub>3</sub>)

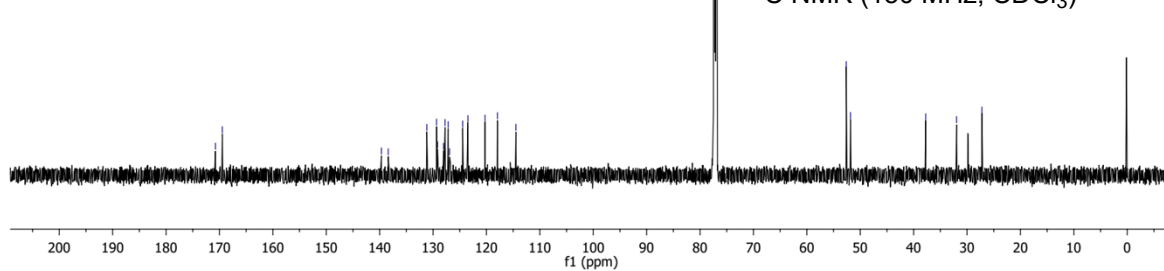

SBT-APP-DG removal-1H

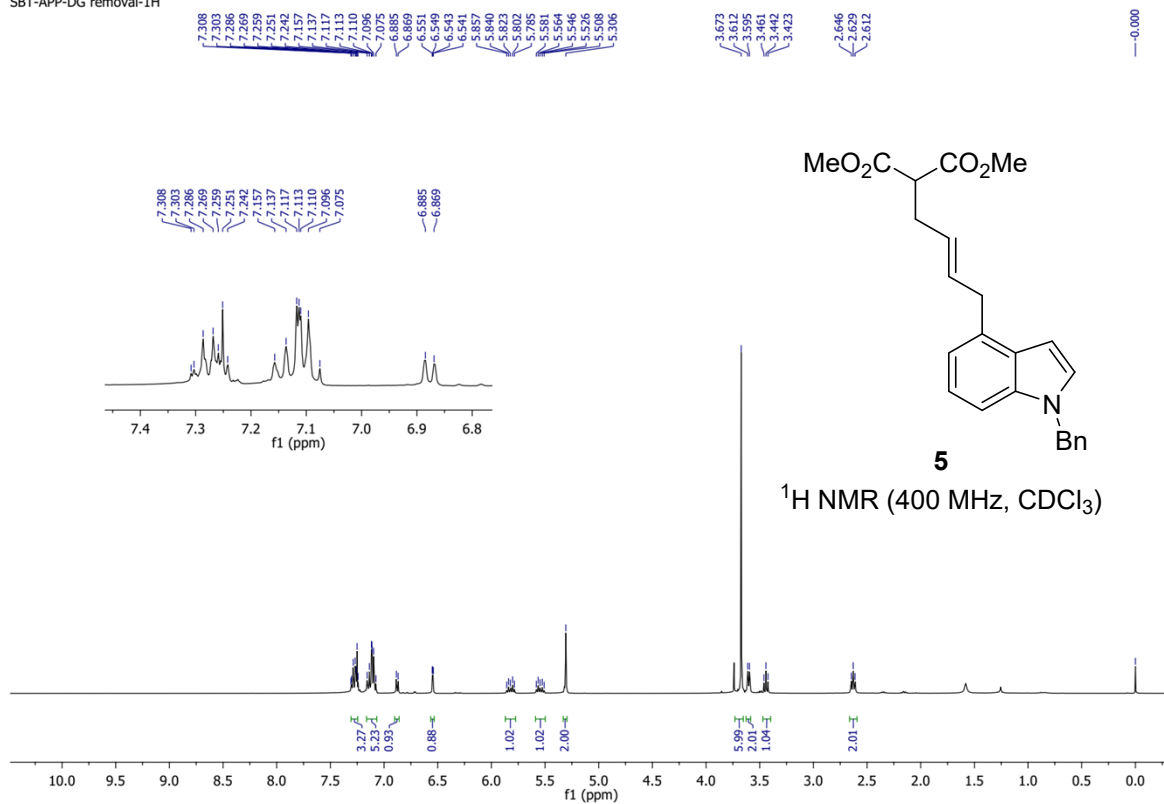

SBT-APP-DG removal-13C

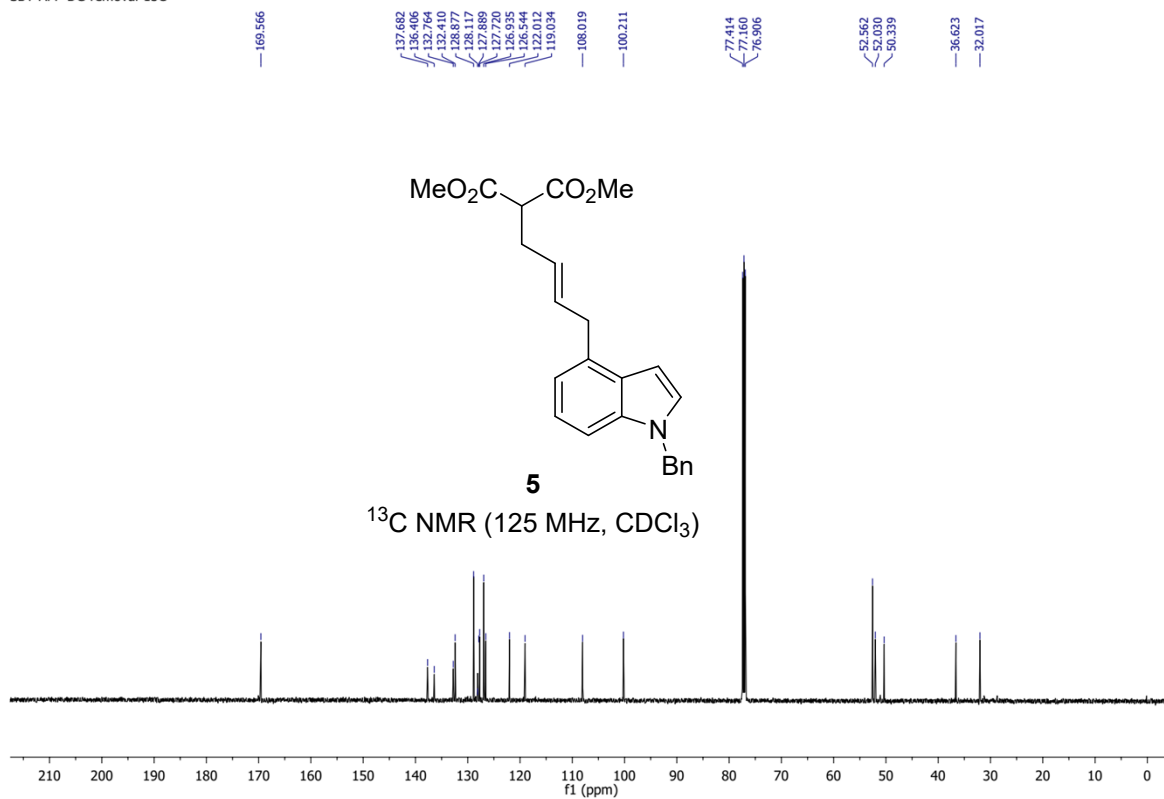

SBT-APP-Krapcho-1H

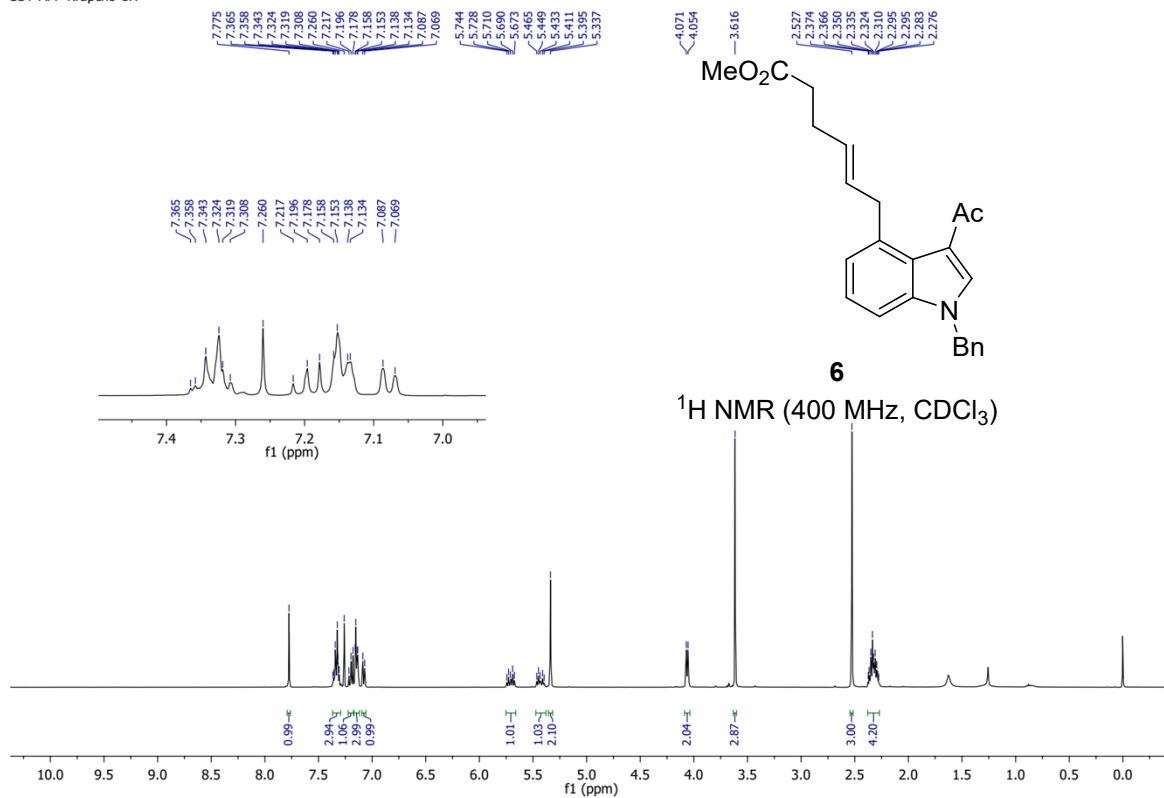

SBT-APP-Krapcho-13C

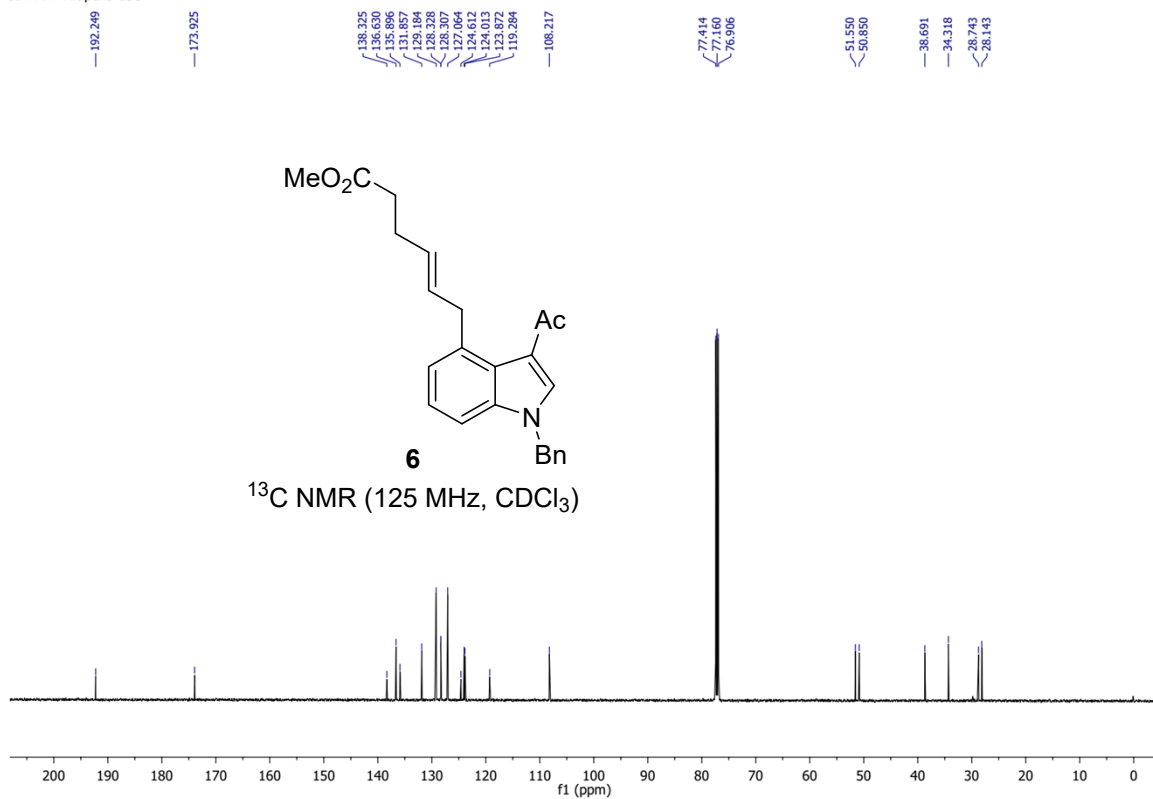



SBT-APP-SCE-1H

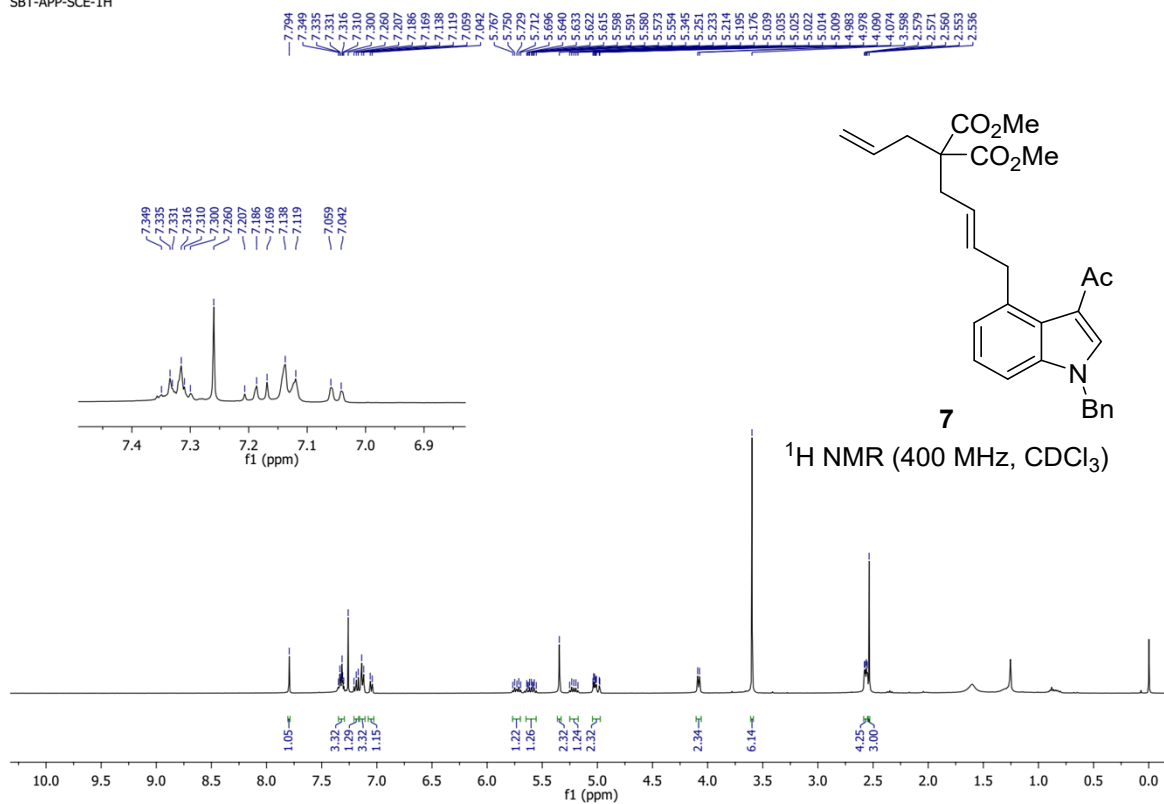

SBT-APP-SCE-13C

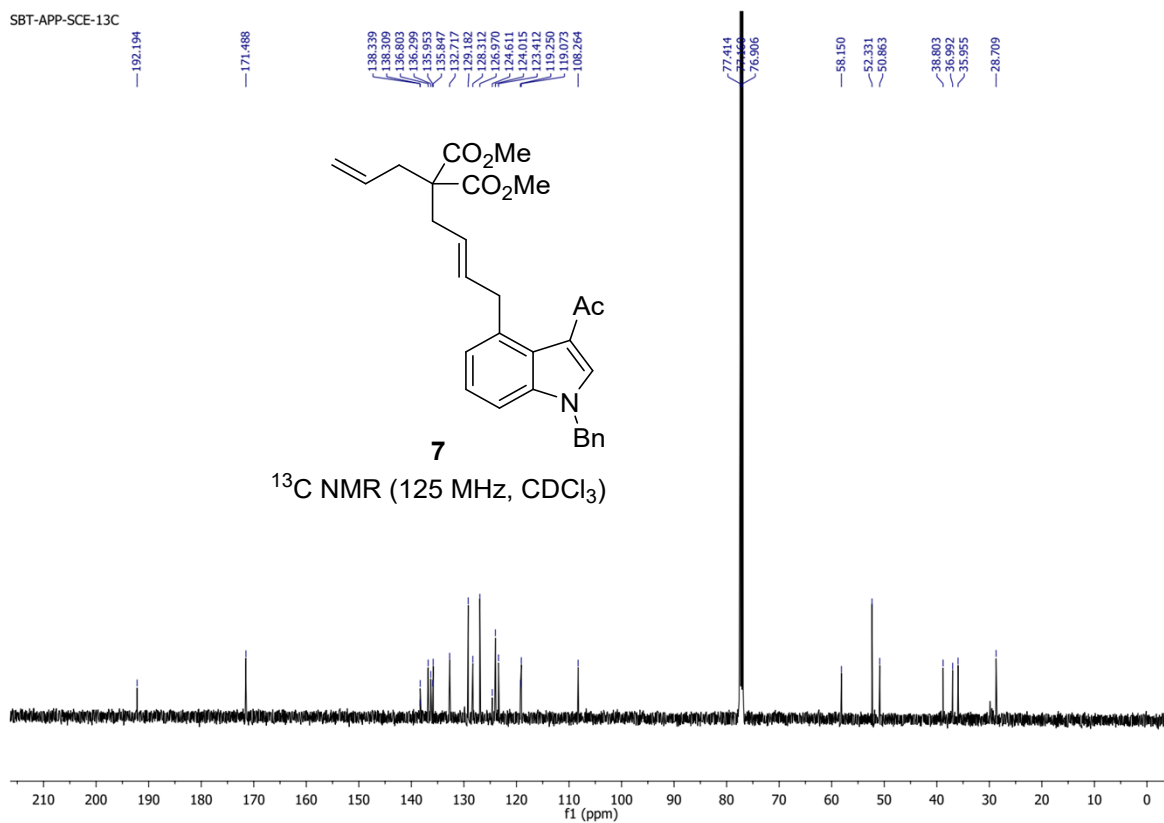

SBT-HDEX-W 2a-RSM-1H

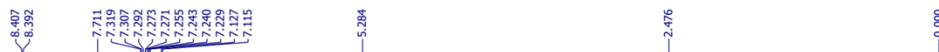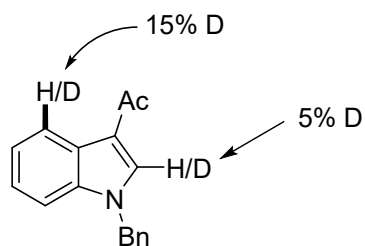

<sup>1</sup>H NMR (500 MHz, CDCl<sub>3</sub>)

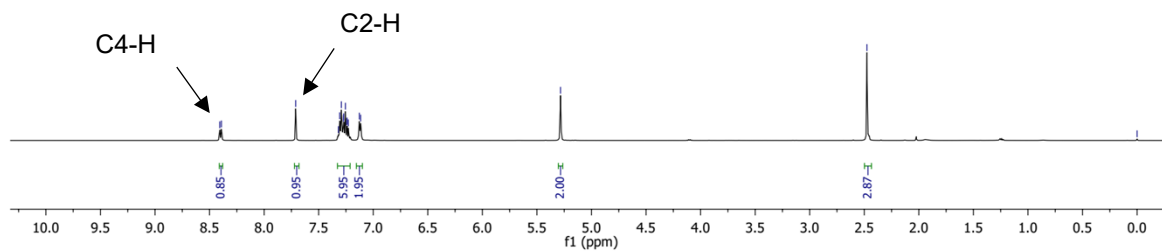

SBT-HDEX-Wo 2a-RSM-1H

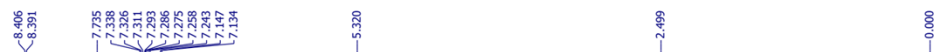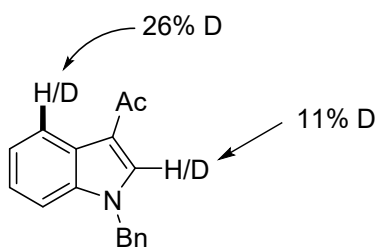

<sup>1</sup>H NMR (500 MHz, CDCl<sub>3</sub>)

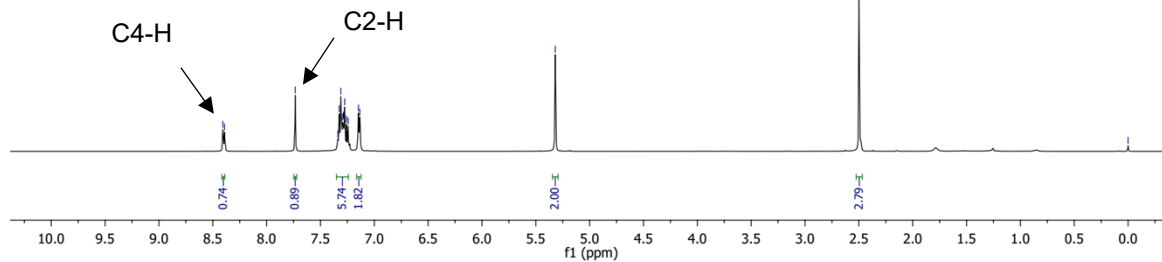

SBT-D2-1a-1H

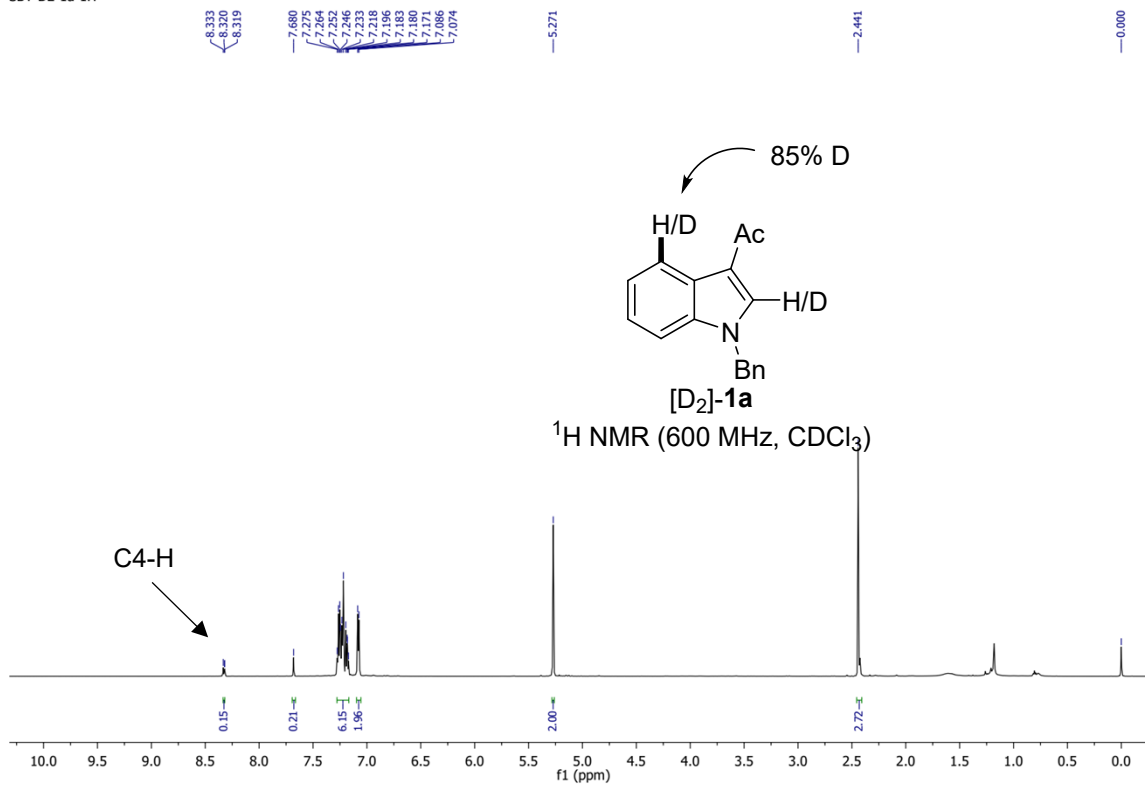

SBT-308-KHKD-RSM-1H

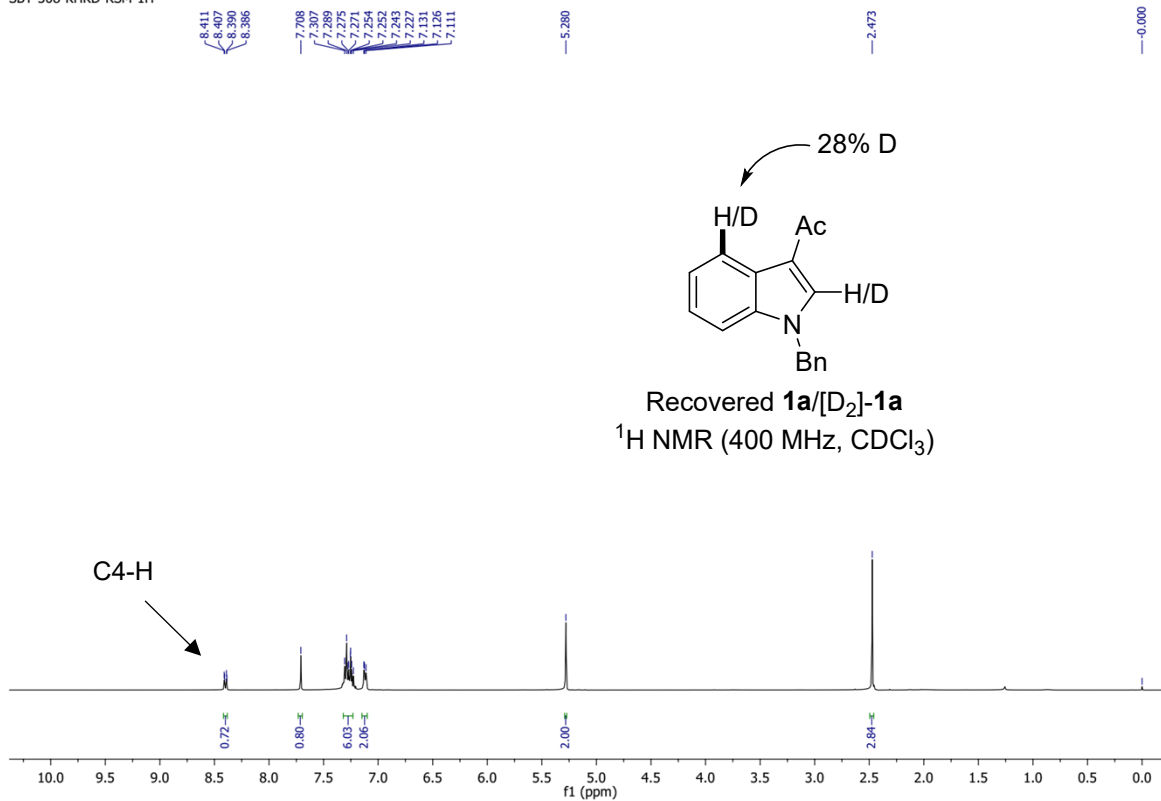

Supplement: d3cc03614f1.pdf [file d3cc03614f1.pdf]
